# Supplementary material
Source: publisher site journal article supplement (https://www.dovepress.com/article/397491)
Supplement: Supplementary file 1 [file get_supplementary_file.php]

Supplementary Figures


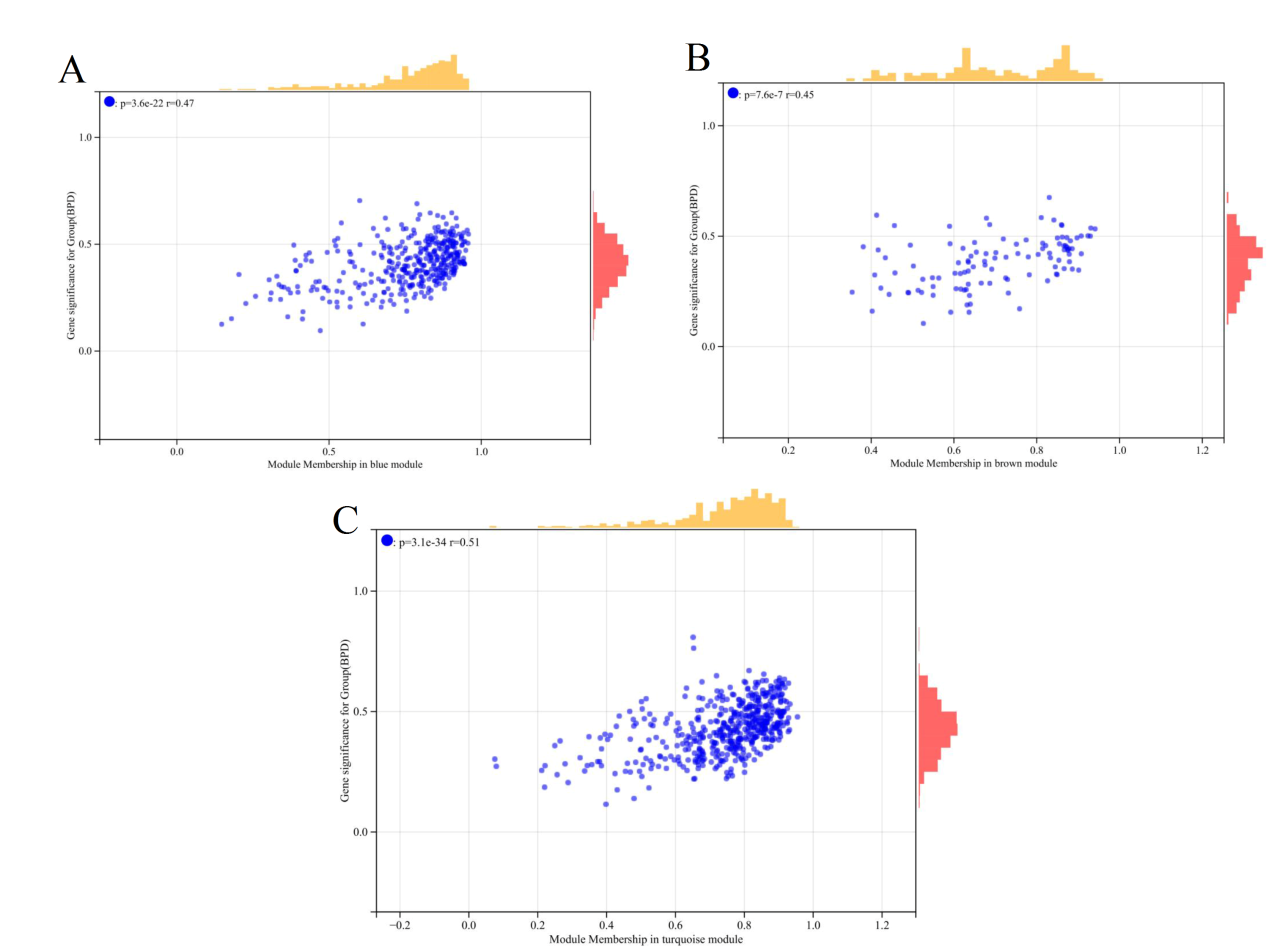


**Figure S1** Scatter plot for correlation analysis between gene significance and gene module membership in blue (A), brown (B), and turquoise (C) modules.


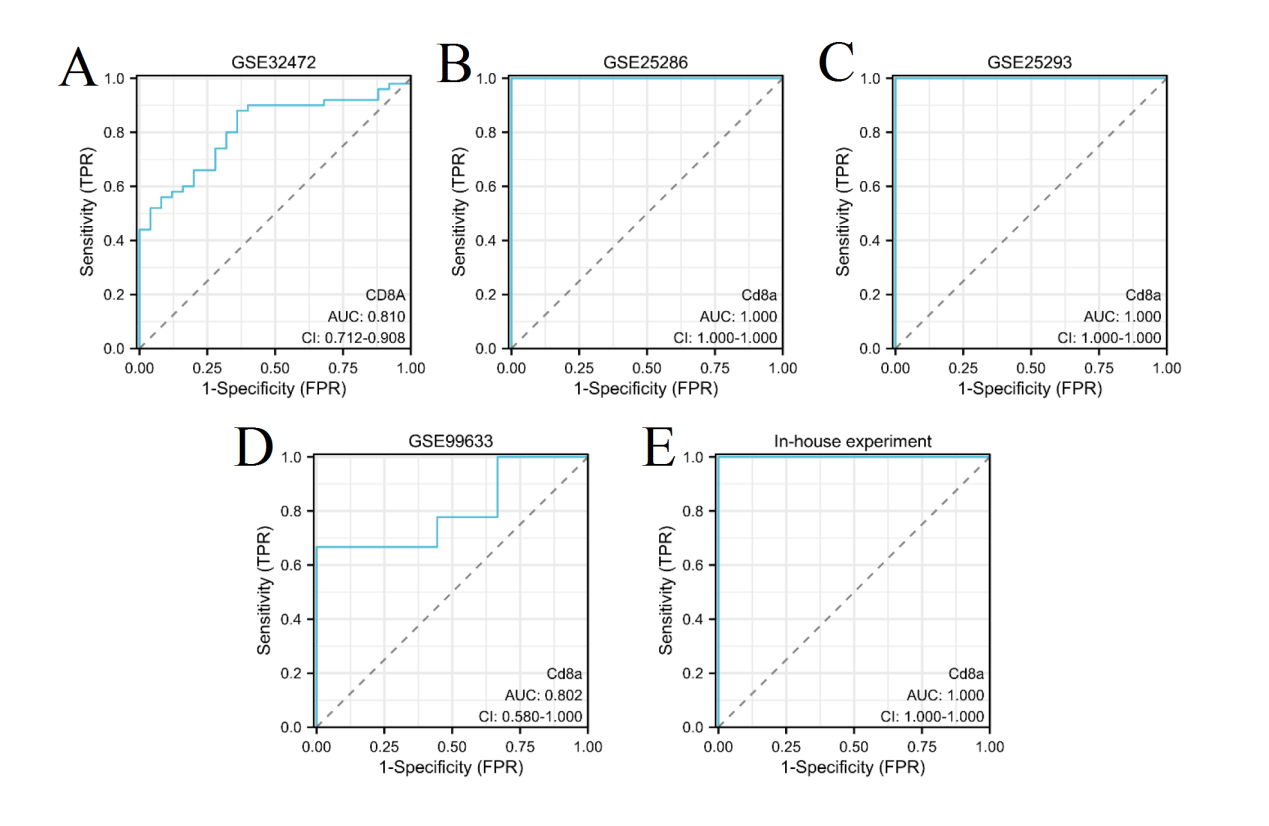


**Figure S2** The receiver manipulation characteristic (ROC) curves for CD8A. ROC curve analysis of CD8A gene in GSE32472 (A), GSE25286 (B), GSE25293 (C), GSE99633 (D), and in-house experiment (E).


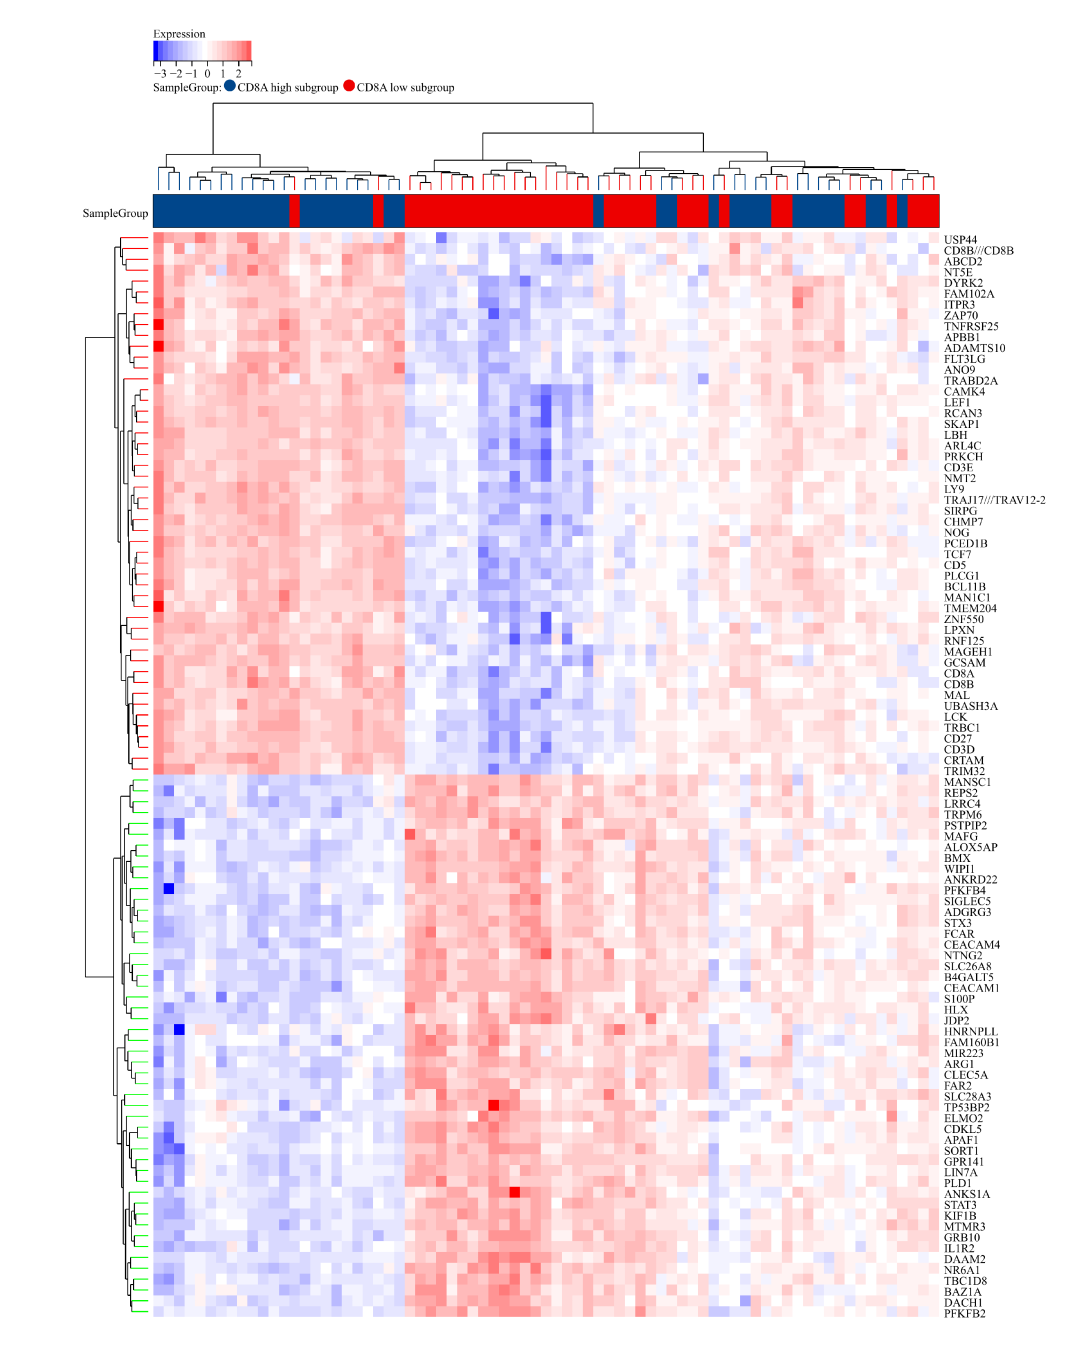


**Figure S3** The top 50 DEGs between CD8A low and high groups in the GSE32472 dataset. Differentially expressed genes (DEGs).

Supplementary Tables

**Table S1.** Sequences of primers used quantitative real-time PCR.

| Gene | Forward primer (5' to 3') | Reverse primer (5' to 3') |
| --- | --- | --- |
| *Cd8a* | AGGTTTCCGGACAGTTACAGTTG | CACCTCCTGGCCAATTTCA |
| β-actin | AAGTCCCTCACCCTCCCAAAAG | AAGCAATGCTGTCACCTTCCC |

**Table S2** The list of 2000 DEGs.

| ID | adj.P.Val | P.Value | t | B | logFC | Gene.symbol |
| --- | --- | --- | --- | --- | --- | --- |
| 7922029 | 3.60E-10 | 2.17E-14 | 8.761045 | 22.185761 | 8.47E-01 | GPA33 |
| 8169263 | 4.20E-10 | 5.56E-14 | 8.582501 | 21.283594 | 7.97E-01 | VSIG1 |
| 7902452 | 4.20E-10 | 6.18E-14 | 8.562616 | 21.18332 | 9.31E-01 | AK5 |
| 7978824 | 4.20E-10 | 6.41E-14 | 8.555731 | 21.148612 | 7.17E-01 | RPS29 |
| 8008627 | 4.23E-10 | 1.18E-13 | 8.439534 | 20.563625 | 9.94E-01 | NOG |
| 7899029 | 4.23E-10 | 1.37E-13 | 8.410972 | 20.420072 | 5.22E-01 | MAN1C1 |
| 7940391 | 4.23E-10 | 1.39E-13 | 8.407879 | 20.404534 | 6.95E-01 | CD6 |
| 8070629 | 4.23E-10 | 1.40E-13 | 8.407248 | 20.401365 | 5.79E-01 | ERVH48-1 |
| 7997453 | 6.31E-10 | 2.37E-13 | -8.306401 | 19.895353 | -4.47E-01 | PLCG2 |
| 7953333 | 6.31E-10 | 2.47E-13 | 8.299047 | 19.858505 | 9.20E-01 | CD27 |
| 8047702 | 8.46E-10 | 3.75E-13 | 8.219092 | 19.458331 | 9.54E-01 | ICOS |
| 7904287 | 8.46E-10 | 3.82E-13 | 8.215651 | 19.441127 | 9.20E-01 | CD2 |
| 7899023 | 1.30E-09 | 6.26E-13 | 8.120853 | 18.96785 | 6.19E-01 | LDLRAP1 |
| 7930921 | 1.50E-09 | 7.78E-13 | 8.078968 | 18.759156 | 3.98E-01 | BAG3 |
| 8136727 | 1.50E-09 | 8.23E-13 | 8.068275 | 18.705916 | 6.13E-01 | TRBC1 |
| 8064485 | 1.50E-09 | 8.85E-13 | 8.054126 | 18.635496 | 6.96E-01 | SIRPG |
| 7992293 | 1.50E-09 | 9.04E-13 | 8.050047 | 18.615205 | 6.24E-01 | TMEM204 |
| 8068788 | 2.87E-09 | 1.81E-12 | 7.916331 | 17.951336 | 7.74E-01 | UBASH3A |
| 8089478 | 3.25E-09 | 2.15E-12 | 7.883263 | 17.787603 | 7.44E-01 | GCSAM |
| 8147012 | 3.36E-09 | 2.41E-12 | 7.860543 | 17.675215 | 5.10E-01 | PKIA |
| 8042066 | 3.36E-09 | 2.43E-12 | 7.859429 | 17.669706 | 5.43E-01 | CFAP36 |
| 7952056 | 3.42E-09 | 2.57E-12 | 7.848504 | 17.615694 | 9.50E-01 | CD3D |
| 8135488 | 4.17E-09 | 3.32E-12 | 7.79887 | 17.370577 | 1.25 | LRRN3 |
| 7981242 | 4.17E-09 | 3.44E-12 | 7.791713 | 17.33527 | 6.32E-01 | BCL11B |
| 7898957 | 4.92E-09 | 4.29E-12 | 7.749083 | 17.125137 | 6.85E-01 | RCAN3 |
| 8120927 | 6.04E-09 | 5.52E-12 | 7.700114 | 16.884164 | 3.92E-01 | RWDD2A |
| 7923889 | 6.04E-09 | 5.73E-12 | 7.692863 | 16.848522 | 4.31E-01 | EIF2D |
| 7999903 | 6.04E-09 | 5.82E-12 | 7.689908 | 16.833995 | 4.42E-01 | KNOP1 |
| 8008064 | 6.34E-09 | 6.29E-12 | 7.674529 | 16.758437 | 4.04E-01 | PNPO |
| 8081341 | 6.52E-09 | 6.67E-12 | 7.663247 | 16.703036 | 4.64E-01 | FAM172BP |
| 8000236 | 7.03E-09 | 7.40E-12 | 7.643035 | 16.60384 | 5.45E-01 | CDR2 |
| 7932227 | 7.51E-09 | 8.48E-12 | 7.616418 | 16.473333 | 6.46E-01 | NMT2 |
| 7966441 | 7.51E-09 | 8.59E-12 | 7.613992 | 16.461441 | 6.25E-01 | MAPKAPK5-AS1 |
| 8072328 | 7.58E-09 | 8.89E-12 | 7.607261 | 16.428466 | 3.44E-01 | SEC14L2 |
| 8143781 | 7.70E-09 | 9.27E-12 | 7.599065 | 16.388318 | 6.57E-01 | GIMAP6 |
| 8114536 | 8.90E-09 | 1.10E-11 | 7.566012 | 16.226552 | 4.14E-01 | TMEM173 |
| 8096808 | 9.26E-09 | 1.17E-11 | 7.553444 | 16.1651 | 7.78E-01 | MCUB |
| 8115756 | 1.23E-08 | 1.62E-11 | 7.489264 | 15.851777 | 3.75E-01 | KCNMB1 |
| 8169792 | 1.27E-08 | 1.73E-11 | 7.476983 | 15.791915 | 1 | SH2D1A |
| 7927405 | 1.27E-08 | 1.75E-11 | -7.474247 | 15.778585 | -6.46E-01 | WDFY4 |
| 7944185 | 1.29E-08 | 1.82E-11 | 7.466736 | 15.741995 | 1.02 | CD3G |
| 8047677 | 1.30E-08 | 1.87E-11 | 7.461381 | 15.715914 | 8.10E-01 | CD28 |
| 7926900 | 1.30E-08 | 1.92E-11 | -7.456193 | 15.690653 | -4.22E-01 | MAP3K8 |
| 8081676 | 1.32E-08 | 1.99E-11 | 7.449437 | 15.657765 | 4.91E-01 | GTPBP8 |
| 8148476 | 1.60E-08 | 2.49E-11 | -7.40517 | 15.442512 | -7.42E-01 | DENND3 |
| 8100298 | 1.60E-08 | 2.51E-11 | 7.403803 | 15.435873 | 8.18E-01 | OCIAD2 |
| 8173755 | 1.71E-08 | 2.73E-11 | 7.387101 | 15.35477 | 9.07E-01 | ITM2A |
| 7940409 | 1.73E-08 | 2.81E-11 | 7.381243 | 15.326341 | 7.42E-01 | CD5 |
| 8144239 | 1.84E-08 | 3.13E-11 | 7.360203 | 15.224284 | 3.85E-01 | FBXO25 |
| 8149500 | 1.84E-08 | 3.15E-11 | 7.359033 | 15.218613 | 3.74E-01 | MTUS1 |
| 7944179 | 1.95E-08 | 3.41E-11 | 7.343414 | 15.142922 | 8.03E-01 | CD3E |
| 7938608 | 2.91E-08 | 5.16E-11 | 7.261261 | 14.74568 | 4.13E-01 | SPON1 |
| 8180123 | 3.02E-08 | 5.48E-11 | 7.249347 | 14.688199 | 3.12E-01 | VPS52 |
| 8145532 | 3.02E-08 | 5.53E-11 | 7.247363 | 14.678629 | 5.24E-01 | EPHX2 |
| 7946149 | 3.42E-08 | 6.38E-11 | 7.219147 | 14.542636 | 4.66E-01 | APBB1 |
| 7953483 | 4.36E-08 | 8.27E-11 | 7.16761 | 14.294722 | 4.35E-01 | USP5 |
| 8157949 | 4.56E-08 | 9.05E-11 | -7.149713 | 14.208779 | -3.51E-01 | RALGPS1 |
| 8053379 | 5.24E-08 | 1.06E-10 | 7.117622 | 14.054862 | 6.50E-01 | TRABD2A |
| 7976795 | 5.24E-08 | 1.08E-10 | -7.114314 | 14.039011 | -7.23E-01 | MEG3 |
| 7899753 | 5.24E-08 | 1.10E-10 | 7.110088 | 14.018766 | 7.06E-01 | LCK |
| 8167887 | 5.24E-08 | 1.11E-10 | 7.108637 | 14.011813 | 4.54E-01 | MAGEH1 |
| 8027692 | 5.50E-08 | 1.20E-10 | 7.093716 | 13.940368 | 4.71E-01 | ZNF30 |
| 8015031 | 5.50E-08 | 1.21E-10 | 7.092222 | 13.933219 | 7.75E-01 | CCR7 |
| 7921121 | 5.87E-08 | 1.32E-10 | 7.073618 | 13.844223 | 4.32E-01 | MRPL24 |
| 8043504 | 6.04E-08 | 1.38E-10 | 7.065492 | 13.805376 | 6.96E-01 | MAL |
| 8030339 | 6.76E-08 | 1.57E-10 | 7.040167 | 13.684414 | 3.87E-01 | FLT3LG |
| 8134730 | 6.98E-08 | 1.67E-10 | 7.027334 | 13.623183 | 3.75E-01 | CNPY4 |
| 8017718 | 6.98E-08 | 1.67E-10 | 7.026867 | 13.620956 | 3.84E-01 | AXIN2 |
| 7915207 | 6.98E-08 | 1.68E-10 | 7.02599 | 13.61677 | 3.88E-01 | PABPC4 |
| 8100231 | 7.63E-08 | 1.86E-10 | -7.005764 | 13.520353 | -5.54E-01 | TEC |
| 8072302 | 8.22E-08 | 2.03E-10 | -6.988316 | 13.437262 | -5.90E-01 | MTMR3 |
| 7984922 | 8.22E-08 | 2.08E-10 | 6.983578 | 13.414714 | 3.95E-01 | MPI |
| 8000413 | 8.22E-08 | 2.08E-10 | 6.98341 | 13.413916 | 4.17E-01 | NSMCE1 |
| 8137240 | 9.79E-08 | 2.53E-10 | 6.943738 | 13.225331 | 6.95E-01 | GIMAP7 |
| 8123695 | 1.06E-07 | 2.81E-10 | 6.922994 | 13.126889 | 5.47E-01 | ECI2 |
| 7944739 | 1.09E-07 | 2.92E-10 | 6.914999 | 13.088979 | 7.52E-01 | CRTAM |
| 8022728 | 1.12E-07 | 3.04E-10 | 6.906618 | 13.049254 | 6.96E-01 | DSC1 |
| 8042843 | 1.13E-07 | 3.10E-10 | 6.903023 | 13.03222 | 4.24E-01 | WDR54 |
| 7912659 | 1.13E-07 | 3.14E-10 | 6.899995 | 13.017875 | 4.71E-01 | AGMAT |
| 7926105 | 1.13E-07 | 3.16E-10 | 6.898907 | 13.012725 | 5.83E-01 | GATA3 |
| 8149399 | 1.21E-07 | 3.41E-10 | -6.883497 | 12.939764 | -4.76E-01 | LONRF1 |
| 7986293 | 1.23E-07 | 3.51E-10 | -6.877604 | 12.911884 | -1.09 | MCTP2 |
| 8175666 | 1.23E-07 | 3.54E-10 | -6.875958 | 12.904094 | -1.08 | GABRE |
| 7918487 | 1.26E-07 | 3.66E-10 | 6.86912 | 12.871753 | 5.61E-01 | DENND2D |
| 8073242 | 1.27E-07 | 3.76E-10 | 6.864042 | 12.847748 | 5.08E-01 | ADSL |
| 8108050 | 1.27E-07 | 3.78E-10 | 6.862711 | 12.841457 | 6.50E-01 | TCF7 |
| 8137675 | 1.27E-07 | 3.80E-10 | 6.861484 | 12.835656 | 3.33E-01 | PRKAR1B |
| 7903920 | 1.47E-07 | 4.46E-10 | 6.829187 | 12.68315 | 8.87E-01 | CHI3L2 |
| 7990528 | 1.56E-07 | 4.80E-10 | 6.814637 | 12.614534 | 3.80E-01 | SNUPN |
| 7990700 | 1.56E-07 | 4.85E-10 | 6.812472 | 12.604333 | 3.44E-01 | WDR61 |
| 8108861 | 1.62E-07 | 5.11E-10 | 6.80189 | 12.554475 | 3.09E-01 | NDFIP1 |
| 8107985 | 1.64E-07 | 5.24E-10 | 6.796715 | 12.5301 | 3.33E-01 | CCNI2 |
| 7992987 | 1.67E-07 | 5.38E-10 | 6.791208 | 12.504176 | 4.30E-01 | HMOX2 |
| 8063427 | 1.68E-07 | 5.44E-10 | 6.788927 | 12.49344 | 4.33E-01 | MOCS3 |
| 8111136 | 1.72E-07 | 5.75E-10 | 6.777916 | 12.441635 | 6.26E-01 | FAM134B |
| 7904293 | 1.74E-07 | 5.88E-10 | 6.773367 | 12.42024 | 3.10E-01 | PTGFRN |
| 7920123 | 1.79E-07 | 6.10E-10 | 6.765806 | 12.384698 | 5.56E-01 | S100A10 |
| 7966448 | 1.79E-07 | 6.14E-10 | 6.764506 | 12.378586 | 3.49E-01 | TMEM116 |
| 7961693 | 1.84E-07 | 6.38E-10 | 6.756611 | 12.341489 | 7.80E-01 | LDHB |
| 8145259 | 1.84E-07 | 6.41E-10 | 6.755844 | 12.33789 | 6.19E-01 | CHMP7 |
| 8036010 | 1.84E-07 | 6.53E-10 | 6.751836 | 12.319064 | 5.62E-01 | PEPD |
| 7951654 | 1.84E-07 | 6.57E-10 | 6.750824 | 12.314314 | 3.69E-01 | FDXACB1 |
| 7927215 | 1.84E-07 | 6.58E-10 | -6.750345 | 12.312064 | -5.23E-01 | ALOX5 |
| 8145652 | 1.90E-07 | 6.94E-10 | 6.739675 | 12.261978 | 4.92E-01 | LEPROTL1 |
| 7915743 | 1.90E-07 | 7.00E-10 | -6.737916 | 12.253722 | -4.16E-01 | CCDC17 |
| 8038395 | 1.90E-07 | 7.07E-10 | 6.735691 | 12.243283 | 5.30E-01 | NOSIP |
| 8155268 | 1.90E-07 | 7.09E-10 | 6.735211 | 12.241034 | 5.52E-01 | POLR1E |
| 7926708 | 1.92E-07 | 7.25E-10 | 6.730631 | 12.219551 | 4.81E-01 | THNSL1 |
| 8149638 | 1.92E-07 | 7.28E-10 | 6.72984 | 12.215837 | 4.45E-01 | DOK2 |
| 7958211 | 1.92E-07 | 7.34E-10 | 6.728274 | 12.208496 | 4.61E-01 | C12orf45 |
| 8100834 | 1.98E-07 | 7.66E-10 | 6.719396 | 12.166876 | 3.51E-01 | GRSF1 |
| 7979196 | 2.34E-07 | 9.22E-10 | 6.681627 | 11.990063 | 4.62E-01 | GNPNAT1 |
| 7921076 | 2.40E-07 | 9.58E-10 | 6.673895 | 11.953917 | 4.46E-01 | GPATCH4 |
| 7909455 | 2.40E-07 | 9.61E-10 | 6.673199 | 11.950666 | 4.28E-01 | TRAF3IP3 |
| 8034615 | 2.40E-07 | 9.66E-10 | 6.672124 | 11.945641 | 4.29E-01 | TRMT1 |
| 8122600 | 2.59E-07 | 1.05E-09 | -6.65505 | 11.865895 | -7.09E-01 | STXBP5 |
| 8016414 | 3.05E-07 | 1.27E-09 | 6.616819 | 11.687647 | 7.37E-01 | SKAP1 |
| 8173732 | 3.05E-07 | 1.28E-09 | 6.613977 | 11.674412 | 5.80E-01 | TAF9B |
| 8086627 | 3.10E-07 | 1.31E-09 | 6.609204 | 11.652193 | 3.16E-01 | ALS2CL |
| 7956251 | 3.22E-07 | 1.38E-09 | 6.599546 | 11.607256 | 4.04E-01 | IL23A |
| 8081537 | 3.25E-07 | 1.40E-09 | 6.596245 | 11.591904 | 8.68E-01 | TRAT1 |
| 8137244 | 3.29E-07 | 1.43E-09 | 6.591317 | 11.56899 | 4.68E-01 | GIMAP4 |
| 7969544 | 3.57E-07 | 1.57E-09 | 6.572755 | 11.482744 | 3.71E-01 | NDFIP2 |
| 8005512 | 3.63E-07 | 1.61E-09 | 6.567366 | 11.457726 | 4.18E-01 | PRPSAP2 |
| 7913593 | 3.63E-07 | 1.62E-09 | 6.566593 | 11.454137 | 5.22E-01 | TCEA3 |
| 7955943 | 3.69E-07 | 1.66E-09 | -6.560756 | 11.427049 | -4.17E-01 | PDE1B |
| 8125172 | 3.69E-07 | 1.67E-09 | 6.559318 | 11.420377 | 3.07E-01 | EHMT2 |
| 8086555 | 3.72E-07 | 1.70E-09 | 6.555976 | 11.404872 | 4.57E-01 | LZTFL1 |
| 8036777 | 3.80E-07 | 1.75E-09 | 6.55011 | 11.377669 | 6.05E-01 | FBL |
| 7903619 | 3.80E-07 | 1.76E-09 | 6.549183 | 11.373372 | 4.51E-01 | SARS |
| 8156321 | 4.17E-07 | 1.95E-09 | -6.527654 | 11.273628 | -3.38E-01 | SYK |
| 7912040 | 4.17E-07 | 1.95E-09 | 6.527411 | 11.272506 | 4.79E-01 | TNFRSF25 |
| 8019088 | 4.26E-07 | 2.01E-09 | -6.52142 | 11.244774 | -3.70E-01 | LOC100131170 |
| 8169868 | 4.29E-07 | 2.06E-09 | 6.516507 | 11.222039 | 4.93E-01 | UTP14A |
| 7973303 | 4.40E-07 | 2.13E-09 | 6.509637 | 11.190267 | 7.64E-01 | OR6C4 |
| 8139482 | 4.50E-07 | 2.19E-09 | 6.503724 | 11.162931 | 6.95E-01 | SNORA5A |
| 8143575 | 4.59E-07 | 2.25E-09 | 6.498548 | 11.139011 | 3.30E-01 | EPHA1 |
| 8083333 | 4.67E-07 | 2.32E-09 | 6.492253 | 11.10993 | 5.20E-01 | EIF2A |
| 8152988 | 4.67E-07 | 2.33E-09 | -6.490968 | 11.103994 | -4.36E-01 | SLA |
| 8063761 | 4.67E-07 | 2.35E-09 | -6.489716 | 11.098212 | -3.64E-01 | CDH26 |
| 8125671 | 4.71E-07 | 2.40E-09 | 6.485413 | 11.078345 | 3.53E-01 | WDR46 |
| 7912537 | 4.73E-07 | 2.42E-09 | 6.483656 | 11.070232 | 4.75E-01 | DHRS3 |
| 8040278 | 4.73E-07 | 2.45E-09 | 6.48104 | 11.058159 | 4.61E-01 | PQLC3 |
| 8137250 | 4.84E-07 | 2.53E-09 | 6.473913 | 11.025276 | 6.25E-01 | GIMAP2 |
| 8054451 | 4.85E-07 | 2.56E-09 | 6.471319 | 11.013312 | 3.76E-01 | EDAR |
| 8104901 | 4.85E-07 | 2.57E-09 | 6.471238 | 11.012937 | 8.15E-01 | IL7R |
| 7916403 | 5.09E-07 | 2.73E-09 | 6.458583 | 10.954597 | 4.45E-01 | SSBP3 |
| 8102232 | 5.09E-07 | 2.74E-09 | 6.457753 | 10.950774 | 7.81E-01 | LEF1 |
| 7972021 | 5.13E-07 | 2.78E-09 | 6.454755 | 10.93696 | 4.19E-01 | TBC1D4 |
| 7911989 | 5.18E-07 | 2.84E-09 | 6.4504 | 10.916902 | 6.69E-01 | RPL22 |
| 7945040 | 5.24E-07 | 2.90E-09 | 6.445968 | 10.896491 | 3.85E-01 | HYLS1 |
| 7955450 | 5.29E-07 | 2.95E-09 | 6.442644 | 10.881191 | 3.15E-01 | LETMD1 |
| 7992917 | 5.45E-07 | 3.05E-09 | 6.4354 | 10.847856 | 4.42E-01 | CLUAP1 |
| 8099051 | 5.51E-07 | 3.10E-09 | 6.432085 | 10.832605 | 3.43E-01 | NOP14 |
| 7910630 | 5.59E-07 | 3.17E-09 | 6.42757 | 10.811841 | 4.99E-01 | COA6 |
| 8014008 | 5.59E-07 | 3.17E-09 | 6.427117 | 10.809759 | 3.50E-01 | BLMH |
| 7992828 | 5.70E-07 | 3.26E-09 | 6.421902 | 10.785783 | 5.60E-01 | IL32 |
| 8095539 | 5.72E-07 | 3.29E-09 | 6.419931 | 10.776726 | 5.14E-01 | UTP3 |
| 7997933 | 5.84E-07 | 3.41E-09 | 6.412411 | 10.742177 | 4.29E-01 | RPL13 |
| 7917370 | 6.04E-07 | 3.54E-09 | -6.404226 | 10.704593 | -5.66E-01 | COL24A1 |
| 8052562 | 6.09E-07 | 3.59E-09 | 6.401657 | 10.692797 | 5.08E-01 | CCT4 |
| 8008263 | 6.71E-07 | 4.00E-09 | 6.379216 | 10.589884 | 4.28E-01 | PDK2 |
| 7933186 | 6.76E-07 | 4.07E-09 | 6.375618 | 10.573396 | 4.81E-01 | ZNF32 |
| 7925257 | 6.84E-07 | 4.13E-09 | -6.372229 | 10.557874 | -6.65E-01 | LYST |
| 7952069 | 6.89E-07 | 4.28E-09 | 6.364946 | 10.524524 | 4.62E-01 | IFT46 |
| 7955646 | 6.89E-07 | 4.31E-09 | 6.363681 | 10.518733 | 4.94E-01 | EIF4B |
| 8116848 | 7.52E-07 | 4.73E-09 | 6.344348 | 10.430297 | 5.05E-01 | PAK1IP1 |
| 7903786 | 7.62E-07 | 4.85E-09 | -6.338986 | 10.405795 | -4.29E-01 | CSF1 |
| 7915787 | 7.69E-07 | 4.95E-09 | 6.334631 | 10.3859 | 3.94E-01 | PIK3R3 |
| 8063903 | 7.69E-07 | 5.00E-09 | 6.332623 | 10.376727 | 6.41E-01 | RPS21 |
| 8066431 | 7.69E-07 | 5.01E-09 | 6.331927 | 10.37355 | 5.76E-01 | ADA |
| 8066985 | 7.87E-07 | 5.16E-09 | -6.32611 | 10.34699 | -5.05E-01 | FAM65C |
| 7922351 | 8.10E-07 | 5.36E-09 | -6.318184 | 10.310816 | -5.30E-01 | LOC101928673 |
| 8103975 | 8.22E-07 | 5.46E-09 | -6.314116 | 10.29226 | -1.16 | SLED1 |
| 7999520 | 8.39E-07 | 5.60E-09 | 6.308778 | 10.267917 | 6.62E-01 | RSL1D1 |
| 8085412 | 8.76E-07 | 5.89E-09 | -6.298135 | 10.219415 | -4.22E-01 | IQSEC1 |
| 8141459 | 8.76E-07 | 5.92E-09 | 6.297371 | 10.215935 | 3.57E-01 | GAL3ST4 |
| 7983606 | 8.76E-07 | 5.92E-09 | 6.297075 | 10.214584 | 4.43E-01 | EID1 |
| 7901765 | 8.95E-07 | 6.11E-09 | 6.290653 | 10.185339 | 6.35E-01 | HOOK1 |
| 8046306 | 9.58E-07 | 6.60E-09 | 6.274423 | 10.111486 | 3.77E-01 | GORASP2 |
| 8180393 | 1.01E-06 | 7.01E-09 | 6.261823 | 10.054215 | 4.52E-01 | POLR2M |
| 8060205 | 1.02E-06 | 7.10E-09 | 6.259072 | 10.041715 | 3.77E-01 | PASK |
| 8180417 | 1.08E-06 | 7.65E-09 | 6.243482 | 9.970944 | 3.80E-01 | METTL2B |
| 8075430 | 1.09E-06 | 7.76E-09 | 6.240436 | 9.957124 | 3.18E-01 | MORC2 |
| 8109507 | 1.10E-06 | 7.91E-09 | 6.236471 | 9.939141 | 7.72E-01 | ITK |
| 8101489 | 1.11E-06 | 7.99E-09 | 6.234182 | 9.928765 | 5.43E-01 | FAM175A |
| 7955045 | 1.11E-06 | 8.06E-09 | 6.232601 | 9.921595 | 4.51E-01 | PCED1B |
| 8079462 | 1.11E-06 | 8.11E-09 | -6.231273 | 9.915578 | -6.09E-01 | NBEAL2 |
| 7978644 | 1.13E-06 | 8.24E-09 | -6.227943 | 9.900482 | -6.68E-01 | NFKBIA |
| 8148304 | 1.17E-06 | 8.58E-09 | -6.219361 | 9.861606 | -9.00E-01 | TRIB1 |
| 7929901 | 1.17E-06 | 8.62E-09 | 6.218308 | 9.856837 | 3.67E-01 | C10orf2 |
| 8174322 | 1.17E-06 | 8.63E-09 | 6.2181 | 9.855897 | 3.20E-01 | MORC4 |
| 8037023 | 1.21E-06 | 9.13E-09 | 6.206281 | 9.802398 | 4.03E-01 | EXOSC5 |
| 8029958 | 1.25E-06 | 9.54E-09 | 6.196873 | 9.759852 | 5.73E-01 | GLTSCR2 |
| 7988838 | 1.25E-06 | 9.55E-09 | 6.19682 | 9.759612 | 4.23E-01 | LEO1 |
| 8094169 | 1.25E-06 | 9.55E-09 | -6.196787 | 9.759463 | -7.11E-01 | CPEB2 |
| 8132515 | 1.27E-06 | 9.81E-09 | 6.191061 | 9.73358 | 5.34E-01 | BLVRA |
| 8060949 | 1.27E-06 | 9.86E-09 | 6.190073 | 9.729116 | 3.73E-01 | ANKEF1 |
| 7907353 | 1.27E-06 | 9.87E-09 | 6.189735 | 9.727591 | 3.59E-01 | METTL13 |
| 8107673 | 1.28E-06 | 9.94E-09 | 6.188289 | 9.721058 | 3.84E-01 | GRAMD3 |
| 7979250 | 1.31E-06 | 1.03E-08 | 6.179895 | 9.683147 | 3.29E-01 | CNIH1 |
| 7901299 | 1.32E-06 | 1.04E-08 | 6.178689 | 9.677703 | 4.53E-01 | CMPK1 |
| 7955896 | 1.33E-06 | 1.06E-08 | 6.175009 | 9.661089 | 5.10E-01 | COPZ1 |
| 7960320 | 1.43E-06 | 1.14E-08 | 6.158756 | 9.587784 | 3.19E-01 | DCP1B |
| 7942453 | 1.43E-06 | 1.15E-08 | 6.157976 | 9.584267 | 3.65E-01 | PLEKHB1 |
| 7975416 | 1.46E-06 | 1.18E-08 | -6.152603 | 9.560053 | -6.80E-01 | PCNX1 |
| 8152465 | 1.48E-06 | 1.20E-08 | 6.148629 | 9.542151 | 5.49E-01 | EIF3H |
| 8102065 | 1.49E-06 | 1.21E-08 | 6.146518 | 9.532645 | 5.92E-01 | BDH2 |
| 8068593 | 1.49E-06 | 1.23E-08 | -6.143884 | 9.520786 | -6.67E-01 | ETS2 |
| 8148955 | 1.49E-06 | 1.23E-08 | 6.142944 | 9.516553 | 3.23E-01 | C8orf33 |
| 8065817 | 1.49E-06 | 1.23E-08 | 6.142553 | 9.514793 | 3.04E-01 | GSS |
| 8027233 | 1.49E-06 | 1.24E-08 | 6.141925 | 9.511965 | 3.48E-01 | ZNF101 |
| 8049317 | 1.52E-06 | 1.28E-08 | -6.135643 | 9.483695 | -3.97E-01 | DGKD |
| 8127854 | 1.53E-06 | 1.29E-08 | 6.132884 | 9.471281 | 5.00E-01 | ME1 |
| 7986383 | 1.57E-06 | 1.32E-08 | -6.127742 | 9.448156 | -6.63E-01 | IGF1R |
| 8115158 | 1.57E-06 | 1.34E-08 | 6.125597 | 9.43851 | 4.58E-01 | RPS14 |
| 8056222 | 1.57E-06 | 1.34E-08 | 6.125545 | 9.43828 | 7.46E-01 | DPP4 |
| 8154916 | 1.58E-06 | 1.35E-08 | 6.124124 | 9.431892 | 4.17E-01 | GALT |
| 8054945 | 1.59E-06 | 1.36E-08 | 6.122039 | 9.422517 | 4.98E-01 | BIN1 |
| 7976810 | 1.60E-06 | 1.38E-08 | -6.119422 | 9.410757 | -7.12E-01 | SNORD113-3 |
| 7953428 | 1.61E-06 | 1.39E-08 | 6.117926 | 9.404035 | 5.45E-01 | CD4 |
| 7985044 | 1.68E-06 | 1.45E-08 | 6.108075 | 9.359795 | 4.37E-01 | UBE2Q2 |
| 7974689 | 1.74E-06 | 1.51E-08 | 6.099417 | 9.320934 | 3.67E-01 | DACT1 |
| 8044154 | 1.75E-06 | 1.52E-08 | 6.097903 | 9.314144 | 5.50E-01 | CD8B |
| 8092162 | 1.76E-06 | 1.54E-08 | -6.095766 | 9.304557 | -7.00E-01 | PP13439 |
| 8165642 | 1.81E-06 | 1.60E-08 | 6.087469 | 9.267358 | 3.37E-01 | TMEM203 |
| 8132406 | 1.81E-06 | 1.61E-08 | 6.086612 | 9.263517 | 3.78E-01 | RALA |
| 7956737 | 1.81E-06 | 1.61E-08 | -6.086196 | 9.261655 | -4.03E-01 | MIRLET7I |
| 7966368 | 1.83E-06 | 1.63E-08 | 6.083197 | 9.248215 | 3.82E-01 | PPP1CC |
| 8107307 | 1.84E-06 | 1.65E-08 | 6.080715 | 9.237097 | 7.73E-01 | CAMK4 |
| 8012257 | 1.86E-06 | 1.67E-08 | 6.077885 | 9.224421 | 4.01E-01 | TP53 |
| 8109576 | 1.86E-06 | 1.69E-08 | 6.075608 | 9.214222 | 4.22E-01 | THG1L |
| 7918157 | 1.91E-06 | 1.76E-08 | -6.06783 | 9.179406 | -5.19E-01 | VAV3 |
| 7915485 | 1.91E-06 | 1.76E-08 | 6.067818 | 9.179355 | 4.76E-01 | EBNA1BP2 |
| 8075483 | 1.91E-06 | 1.76E-08 | 6.067009 | 9.175733 | 6.38E-01 | PIK3IP1 |
| 8171229 | 1.93E-06 | 1.79E-08 | 6.063809 | 9.161416 | 3.27E-01 | PNPLA4 |
| 7990345 | 1.93E-06 | 1.79E-08 | -6.063283 | 9.159062 | -4.42E-01 | SEMA7A |
| 8014768 | 1.93E-06 | 1.79E-08 | 6.063201 | 9.158697 | 4.58E-01 | PLXDC1 |
| 7962312 | 2.07E-06 | 1.94E-08 | 6.046562 | 9.084316 | 8.44E-01 | ABCD2 |
| 8103389 | 2.11E-06 | 1.99E-08 | 6.041038 | 9.059645 | 4.84E-01 | CTSO |
| 8169920 | 2.12E-06 | 2.02E-08 | 6.037362 | 9.043236 | 3.23E-01 | RBMX2 |
| 8063793 | 2.15E-06 | 2.05E-08 | -6.034476 | 9.030357 | -7.27E-01 | MIR646HG |
| 8009353 | 2.22E-06 | 2.13E-08 | 6.026325 | 8.993993 | 4.02E-01 | PITPNC1 |
| 8007108 | 2.24E-06 | 2.16E-08 | 6.023386 | 8.980886 | 4.24E-01 | TMEM99 |
| 8143433 | 2.28E-06 | 2.22E-08 | 6.017539 | 8.954826 | 4.82E-01 | MRPS33 |
| 8169882 | 2.29E-06 | 2.24E-08 | -6.016163 | 8.948693 | -3.50E-01 | BCORL1 |
| 8176230 | 2.33E-06 | 2.28E-08 | 6.011562 | 8.928195 | 3.12E-01 | RAB39B |
| 8120826 | 2.35E-06 | 2.31E-08 | 6.009259 | 8.917935 | 3.62E-01 | IRAK1BP1 |
| 8106181 | 2.47E-06 | 2.44E-08 | 5.997536 | 8.865756 | 3.33E-01 | BTF3 |
| 8097670 | 2.47E-06 | 2.44E-08 | 5.997505 | 8.865621 | 3.95E-01 | MMAA |
| 8006762 | 2.47E-06 | 2.45E-08 | 5.996578 | 8.861495 | 5.97E-01 | MRPL45 |
| 8165794 | 2.48E-06 | 2.48E-08 | 5.99436 | 8.851629 | 5.90E-01 | CD99 |
| 7968254 | 2.52E-06 | 2.53E-08 | 5.98997 | 8.832108 | 4.13E-01 | POLR1D |
| 7999317 | 2.53E-06 | 2.54E-08 | 5.988952 | 8.827582 | 3.24E-01 | TMEM186 |
| 8112020 | 2.58E-06 | 2.60E-08 | 5.983681 | 8.804152 | 5.18E-01 | MOCS2 |
| 7973056 | 2.63E-06 | 2.66E-08 | 5.97926 | 8.784511 | 5.91E-01 | APEX1 |
| 7906079 | 2.69E-06 | 2.75E-08 | 5.971769 | 8.751243 | 4.05E-01 | RAB25 |
| 8084794 | 2.69E-06 | 2.75E-08 | -5.971661 | 8.750767 | -7.39E-01 | IL1RAP |
| 7936242 | 2.69E-06 | 2.75E-08 | -5.971557 | 8.750302 | -4.08E-01 | ITPRIP |
| 7996891 | 2.70E-06 | 2.78E-08 | 5.969543 | 8.741365 | 5.75E-01 | UTP4 |
| 8060196 | 2.70E-06 | 2.78E-08 | 5.96921 | 8.739887 | 4.35E-01 | MTERF4 |
| 8090664 | 2.70E-06 | 2.79E-08 | 5.968806 | 8.738091 | 3.79E-01 | ASTE1 |
| 8059854 | 2.70E-06 | 2.81E-08 | 5.967021 | 8.730172 | 5.85E-01 | ARL4C |
| 8167654 | 2.70E-06 | 2.81E-08 | 5.96702 | 8.730167 | 4.27E-01 | GSPT2 |
| 7910446 | 2.71E-06 | 2.83E-08 | 5.965543 | 8.723612 | 3.43E-01 | COG2 |
| 8103226 | 2.72E-06 | 2.86E-08 | -5.963739 | 8.715608 | -4.73E-01 | TMEM154 |
| 8107691 | 2.74E-06 | 2.88E-08 | 5.961897 | 8.707437 | 5.41E-01 | PHAX |
| 8106271 | 2.75E-06 | 2.95E-08 | 5.957093 | 8.686134 | 7.77E-01 | NSA2 |
| 7978527 | 2.75E-06 | 2.95E-08 | 5.956913 | 8.685337 | 4.36E-01 | DTD2 |
| 8118622 | 2.75E-06 | 2.96E-08 | 5.956286 | 8.682555 | 3.99E-01 | HSD17B8 |
| 7905163 | 2.77E-06 | 2.98E-08 | 5.954618 | 8.675164 | 3.83E-01 | MRPS21 |
| 7985934 | 2.78E-06 | 3.01E-08 | -5.95281 | 8.667149 | -3.20E-01 | SEMA4B |
| 8041000 | 2.82E-06 | 3.05E-08 | 5.949445 | 8.652234 | 3.33E-01 | GPN1 |
| 8066848 | 2.89E-06 | 3.13E-08 | -5.943815 | 8.627298 | -4.58E-01 | PREX1 |
| 8064522 | 2.95E-06 | 3.23E-08 | 5.937527 | 8.599456 | 3.78E-01 | IDH3B |
| 8157516 | 2.95E-06 | 3.24E-08 | 5.936828 | 8.596361 | 3.86E-01 | TRIM32 |
| 7976814 | 3.03E-06 | 3.34E-08 | -5.930003 | 8.566165 | -8.83E-01 | SNORD114-2 |
| 8005313 | 3.03E-06 | 3.35E-08 | 5.929536 | 8.5641 | 3.67E-01 | DRG2 |
| 7952522 | 3.08E-06 | 3.42E-08 | 5.924857 | 8.543406 | 5.14E-01 | PUS3 |
| 7898574 | 3.11E-06 | 3.49E-08 | 5.92083 | 8.525602 | 3.39E-01 | MINOS1 |
| 8076344 | 3.11E-06 | 3.49E-08 | 5.920375 | 8.523592 | 3.18E-01 | POLR3H |
| 7900354 | 3.14E-06 | 3.58E-08 | 5.914964 | 8.499683 | 3.18E-01 | PPIE |
| 8054930 | 3.14E-06 | 3.63E-08 | 5.912475 | 8.488685 | 4.60E-01 | NIFK |
| 7916262 | 3.16E-06 | 3.66E-08 | 5.910153 | 8.478431 | 3.93E-01 | C1orf123 |
| 7927202 | 3.16E-06 | 3.67E-08 | 5.909852 | 8.477102 | 4.19E-01 | ZNF22 |
| 8151376 | 3.16E-06 | 3.71E-08 | 5.907397 | 8.466265 | 5.80E-01 | RPL7 |
| 7988077 | 3.16E-06 | 3.72E-08 | 5.907117 | 8.465027 | 3.40E-01 | LCMT2 |
| 7974851 | 3.16E-06 | 3.72E-08 | -5.906739 | 8.463361 | -3.97E-01 | HIF1A |
| 8084345 | 3.16E-06 | 3.73E-08 | 5.906587 | 8.46269 | 3.02E-01 | AP2M1 |
| 8123717 | 3.17E-06 | 3.75E-08 | 5.905383 | 8.457373 | 3.80E-01 | RPP40 |
| 7993185 | 3.19E-06 | 3.78E-08 | 5.903614 | 8.449567 | 5.12E-01 | NUBP1 |
| 8173513 | 3.24E-06 | 3.87E-08 | 5.898447 | 8.426769 | 5.11E-01 | RPS4X |
| 8130464 | 3.26E-06 | 3.90E-08 | 5.896769 | 8.419366 | 3.39E-01 | TMEM242 |
| 8121563 | 3.30E-06 | 3.96E-08 | -5.893145 | 8.403385 | -4.02E-01 | MARCKS |
| 8068375 | 3.38E-06 | 4.10E-08 | 5.885652 | 8.370356 | 3.10E-01 | SMIM11A |
| 7947462 | 3.42E-06 | 4.17E-08 | -5.882323 | 8.355688 | -3.45E-01 | ABTB2 |
| 7918517 | 3.47E-06 | 4.23E-08 | 5.879055 | 8.341294 | 3.47E-01 | WDR77 |
| 7976812 | 3.51E-06 | 4.30E-08 | -5.875854 | 8.327201 | -9.24E-01 | SNORD113-4 |
| 8020806 | 3.53E-06 | 4.35E-08 | 5.873322 | 8.316052 | 5.39E-01 | RNF125 |
| 8033899 | 3.56E-06 | 4.40E-08 | 5.870448 | 8.303404 | 4.86E-01 | EIF3G |
| 8017437 | 3.57E-06 | 4.43E-08 | 5.869229 | 8.29804 | 3.40E-01 | FTSJ3 |
| 8016909 | 3.57E-06 | 4.44E-08 | 5.868937 | 8.296756 | 3.36E-01 | MKS1 |
| 8041553 | 3.59E-06 | 4.46E-08 | 5.867497 | 8.290423 | 3.88E-01 | GEMIN6 |
| 7918034 | 3.71E-06 | 4.66E-08 | 5.858091 | 8.249058 | 6.61E-01 | DPH5 |
| 8102311 | 3.73E-06 | 4.70E-08 | 5.856314 | 8.241248 | 4.82E-01 | CASP6 |
| 8009008 | 3.73E-06 | 4.71E-08 | 5.85578 | 8.238902 | 4.11E-01 | METTL2A |
| 8043848 | 3.73E-06 | 4.73E-08 | 5.855108 | 8.235949 | 3.98E-01 | MRPL30 |
| 7994362 | 3.75E-06 | 4.76E-08 | 5.853738 | 8.229926 | 4.35E-01 | SGF29 |
| 8044473 | 3.80E-06 | 4.83E-08 | 5.850479 | 8.215611 | 4.31E-01 | POLR1B |
| 8156610 | 3.82E-06 | 4.88E-08 | 5.848125 | 8.205269 | 3.17E-01 | HABP4 |
| 8096160 | 3.85E-06 | 4.94E-08 | -5.845601 | 8.194187 | -5.25E-01 | ARHGAP24 |
| 8012013 | 3.87E-06 | 5.00E-08 | 5.843142 | 8.183392 | 5.47E-01 | CLEC10A |
| 7982597 | 3.93E-06 | 5.10E-08 | -5.838746 | 8.164095 | -8.37E-01 | THBS1 |
| 8180297 | 3.96E-06 | 5.15E-08 | 5.836599 | 8.154677 | 3.81E-01 | RPL4 |
| 7969177 | 3.97E-06 | 5.18E-08 | 5.835433 | 8.149563 | 3.13E-01 | ST13P4 |
| 8042576 | 3.97E-06 | 5.18E-08 | 5.835305 | 8.149001 | 3.44E-01 | NAGK |
| 8164907 | 3.97E-06 | 5.19E-08 | 5.834931 | 8.14736 | 3.11E-01 | REXO4 |
| 7906662 | 3.99E-06 | 5.25E-08 | 5.83256 | 8.136959 | 5.42E-01 | UFC1 |
| 8113761 | 4.03E-06 | 5.32E-08 | -5.829388 | 8.123051 | -3.54E-01 | ZNF608 |
| 8139468 | 4.05E-06 | 5.36E-08 | 5.827958 | 8.11678 | 3.10E-01 | TBRG4 |
| 7989951 | 4.11E-06 | 5.46E-08 | -5.824071 | 8.099746 | -4.03E-01 | DACOR1 |
| 8077513 | 4.13E-06 | 5.50E-08 | 5.822206 | 8.091571 | 4.03E-01 | THUMPD3 |
| 8032730 | 4.14E-06 | 5.54E-08 | 5.820716 | 8.085042 | 4.13E-01 | EEF2 |
| 7955376 | 4.14E-06 | 5.56E-08 | -5.81995 | 8.081687 | -4.23E-01 | DIP2B |
| 7973363 | 4.23E-06 | 5.71E-08 | -5.814346 | 8.057145 | -4.40E-01 | REM2 |
| 7967473 | 4.37E-06 | 5.91E-08 | 5.806666 | 8.023531 | 3.14E-01 | EIF2B1 |
| 7979416 | 4.37E-06 | 5.92E-08 | 5.806256 | 8.021737 | 4.88E-01 | TIMM9 |
| 7928516 | 4.43E-06 | 6.03E-08 | -5.802453 | 8.005098 | -4.80E-01 | SAMD8 |
| 7954591 | 4.43E-06 | 6.03E-08 | 5.802256 | 8.004239 | 4.10E-01 | MRPS35 |
| 8115907 | 4.43E-06 | 6.05E-08 | 5.801485 | 8.000867 | 3.04E-01 | NOP16 |
| 8004940 | 4.43E-06 | 6.07E-08 | 5.800826 | 7.997986 | 4.51E-01 | ADPRM |
| 8160682 | 4.47E-06 | 6.15E-08 | 5.797884 | 7.985122 | 3.00E-01 | NOL6 |
| 8162059 | 4.47E-06 | 6.16E-08 | -5.797779 | 7.984662 | -7.91E-01 | SLC28A3 |
| 8180319 | 4.47E-06 | 6.17E-08 | 5.797383 | 7.982929 | 5.18E-01 | TGIF1 |
| 7961390 | 4.49E-06 | 6.23E-08 | 5.79529 | 7.973781 | 4.14E-01 | HEBP1 |
| 8121312 | 4.49E-06 | 6.24E-08 | 5.794989 | 7.972467 | 3.55E-01 | C6orf203 |
| 8043725 | 4.52E-06 | 6.30E-08 | 5.792954 | 7.963571 | 5.50E-01 | ZAP70 |
| 8170187 | 4.53E-06 | 6.34E-08 | 5.79156 | 7.957481 | 5.95E-01 | CD40LG |
| 8097647 | 4.53E-06 | 6.34E-08 | 5.791311 | 7.956395 | 6.20E-01 | ABCE1 |
| 7939068 | 4.53E-06 | 6.35E-08 | 5.791151 | 7.955693 | 6.41E-01 | RPS25 |
| 8117128 | 4.56E-06 | 6.40E-08 | -5.789276 | 7.947502 | -4.43E-01 | E2F3 |
| 8132349 | 4.60E-06 | 6.50E-08 | -5.785983 | 7.933117 | -8.23E-01 | NME8 |
| 8112668 | 4.62E-06 | 6.57E-08 | 5.783771 | 7.92346 | 7.30E-01 | GCNT4 |
| 8017143 | 4.65E-06 | 6.63E-08 | 5.781658 | 7.914233 | 3.11E-01 | PTRH2 |
| 7961964 | 4.66E-06 | 6.67E-08 | 5.780323 | 7.908407 | 4.07E-01 | ASUN |
| 8129410 | 4.66E-06 | 6.68E-08 | 5.780048 | 7.907208 | 7.84E-01 | THEMIS |
| 8075406 | 4.66E-06 | 6.72E-08 | 5.778881 | 7.902113 | 3.30E-01 | PES1 |
| 8044021 | 4.66E-06 | 6.73E-08 | -5.778346 | 7.899777 | -6.95E-01 | IL1RL1 |
| 7939137 | 4.71E-06 | 6.82E-08 | 5.77555 | 7.887579 | 5.09E-01 | EIF3M |
| 7950597 | 4.73E-06 | 6.86E-08 | 5.774244 | 7.881878 | 4.10E-01 | CLNS1A |
| 8004671 | 4.84E-06 | 7.04E-08 | -5.768561 | 7.857094 | -4.63E-01 | KDM6B |
| 8035842 | 4.86E-06 | 7.09E-08 | 5.767074 | 7.850611 | 5.73E-01 | ZNF91 |
| 8049536 | 4.87E-06 | 7.18E-08 | -5.764228 | 7.838208 | -4.06E-01 | LRRFIP1 |
| 8063697 | 4.87E-06 | 7.26E-08 | 5.761905 | 7.828082 | 3.48E-01 | NELFCD |
| 8016438 | 4.88E-06 | 7.30E-08 | 5.76082 | 7.823355 | 3.42E-01 | HOXB2 |
| 8058914 | 4.88E-06 | 7.30E-08 | 5.760538 | 7.822128 | 3.44E-01 | AAMP |
| 7960575 | 4.98E-06 | 7.54E-08 | 5.753722 | 7.792439 | 3.11E-01 | NOP2 |
| 8016552 | 4.98E-06 | 7.54E-08 | 5.753573 | 7.791791 | 4.43E-01 | PHB |
| 7930008 | 4.98E-06 | 7.54E-08 | 5.753528 | 7.791595 | 4.03E-01 | NOLC1 |
| 8011850 | 4.98E-06 | 7.57E-08 | 5.752858 | 7.788676 | 4.63E-01 | C1QBP |
| 8061114 | 5.07E-06 | 7.72E-08 | 5.748326 | 7.768952 | 4.09E-01 | DSTN |
| 8013026 | 5.12E-06 | 7.84E-08 | 5.74496 | 7.754301 | 3.43E-01 | ZNF287 |
| 8138776 | 5.24E-06 | 8.08E-08 | 5.738605 | 7.726665 | 3.38E-01 | HIBADH |
| 7996785 | 5.27E-06 | 8.16E-08 | 5.73624 | 7.716382 | 3.10E-01 | PRMT7 |
| 8076511 | 5.28E-06 | 8.19E-08 | 5.735561 | 7.713431 | 4.63E-01 | RPL5 |
| 7900911 | 5.29E-06 | 8.23E-08 | 5.734491 | 7.70878 | 3.32E-01 | DPH2 |
| 8113220 | 5.40E-06 | 8.41E-08 | -5.729717 | 7.688032 | -3.96E-01 | ELL2 |
| 8163444 | 5.53E-06 | 8.66E-08 | 5.723316 | 7.660231 | 3.20E-01 | ZFP37 |
| 8129804 | 5.54E-06 | 8.69E-08 | -5.722555 | 7.656928 | -4.14E-01 | MAP3K5 |
| 8143759 | 5.59E-06 | 8.79E-08 | 5.720034 | 7.645987 | 3.33E-01 | ATP6V0E2-AS1 |
| 8171111 | 5.68E-06 | 9.00E-08 | 5.714804 | 7.623289 | 4.52E-01 | SLC25A6 |
| 8087283 | 5.68E-06 | 9.01E-08 | 5.714722 | 7.622933 | 4.07E-01 | QARS |
| 7943779 | 5.68E-06 | 9.01E-08 | 5.714614 | 7.622465 | 3.92E-01 | C11orf1 |
| 7932796 | 5.68E-06 | 9.04E-08 | -5.71383 | 7.619065 | -5.91E-01 | SVIL |
| 8111925 | 5.68E-06 | 9.08E-08 | 5.713014 | 7.615524 | 4.54E-01 | ANXA2R |
| 8123981 | 5.68E-06 | 9.09E-08 | -5.712821 | 7.614686 | -4.66E-01 | GFOD1 |
| 8095230 | 5.70E-06 | 9.14E-08 | 5.711447 | 7.608731 | 4.28E-01 | SRP72 |
| 7905329 | 5.74E-06 | 9.22E-08 | 5.709485 | 7.600221 | 3.41E-01 | MLLT11 |
| 8056995 | 5.75E-06 | 9.25E-08 | 5.7088 | 7.597248 | 3.83E-01 | TTC30B |
| 7931914 | 5.77E-06 | 9.32E-08 | 5.707247 | 7.590517 | 5.05E-01 | IL2RA |
| 8009227 | 5.77E-06 | 9.33E-08 | 5.706894 | 7.588988 | 3.57E-01 | PSMC5 |
| 7936559 | 5.77E-06 | 9.36E-08 | -5.706235 | 7.586129 | -5.15E-01 | PDZD8 |
| 8096224 | 5.83E-06 | 9.48E-08 | -5.70346 | 7.574102 | -4.72E-01 | AFF1 |
| 8029969 | 5.84E-06 | 9.51E-08 | 5.702703 | 7.570823 | 3.73E-01 | SEPW1 |
| 8131583 | 5.90E-06 | 9.64E-08 | 5.699819 | 7.558326 | 3.93E-01 | BZW2 |
| 7924526 | 5.90E-06 | 9.65E-08 | -5.699569 | 7.557242 | -3.15E-01 | TP53BP2 |
| 8089034 | 5.94E-06 | 9.74E-08 | 5.697592 | 7.548679 | 4.83E-01 | ARMC10 |
| 8091503 | 5.96E-06 | 9.79E-08 | 5.696535 | 7.544099 | 6.37E-01 | GPR171 |
| 7988031 | 6.00E-06 | 9.87E-08 | 5.694591 | 7.535683 | 6.67E-01 | RPS3A |
| 8113286 | 6.01E-06 | 9.91E-08 | 5.693801 | 7.532264 | 5.39E-01 | RIOK2 |
| 8097148 | 6.06E-06 | 1.00E-07 | -5.69163 | 7.522862 | -6.64E-01 | KIAA1109 |
| 7983928 | 6.08E-06 | 1.01E-07 | 5.690484 | 7.517903 | 3.58E-01 | LIPC |
| 8036357 | 6.15E-06 | 1.02E-07 | 5.686965 | 7.502675 | 3.46E-01 | ZNF790 |
| 7985809 | 6.18E-06 | 1.03E-07 | -5.68524 | 7.495212 | -4.31E-01 | ABHD2 |
| 8081564 | 6.18E-06 | 1.03E-07 | 5.685018 | 7.494249 | 6.96E-01 | CD96 |
| 7957570 | 6.21E-06 | 1.04E-07 | -5.683347 | 7.487023 | -6.20E-01 | PLXNC1 |
| 7958253 | 6.29E-06 | 1.05E-07 | 5.680258 | 7.473661 | 5.93E-01 | C12orf75 |
| 8040173 | 6.31E-06 | 1.06E-07 | 5.679381 | 7.469868 | 4.84E-01 | TAF1B |
| 8083901 | 6.39E-06 | 1.07E-07 | -5.675913 | 7.454876 | -6.51E-01 | FNDC3B |
| 7934133 | 6.43E-06 | 1.08E-07 | 5.673867 | 7.446035 | 6.15E-01 | PPA1 |
| 8000998 | 6.50E-06 | 1.10E-07 | 5.670774 | 7.432673 | 3.11E-01 | VKORC1 |
| 8060611 | 6.50E-06 | 1.10E-07 | 5.670579 | 7.431829 | 3.11E-01 | ITPA |
| 8110106 | 6.50E-06 | 1.10E-07 | -5.669991 | 7.429289 | -6.33E-01 | HRH2 |
| 8113504 | 6.51E-06 | 1.11E-07 | 5.669157 | 7.425685 | 4.14E-01 | NREP |
| 8130211 | 6.56E-06 | 1.12E-07 | -5.666916 | 7.416005 | -8.47E-01 | SYNE1 |
| 8016825 | 6.58E-06 | 1.13E-07 | 5.665555 | 7.41013 | 4.06E-01 | COX11 |
| 8026272 | 6.59E-06 | 1.13E-07 | 5.664579 | 7.405917 | 3.77E-01 | IL27RA |
| 8024120 | 6.61E-06 | 1.14E-07 | -5.663661 | 7.401953 | -3.61E-01 | ABCA7 |
| 7971565 | 6.78E-06 | 1.17E-07 | 5.65752 | 7.375449 | 4.95E-01 | LPAR6 |
| 8174228 | 6.78E-06 | 1.17E-07 | 5.657148 | 7.373843 | 3.87E-01 | TCEAL8 |
| 7929243 | 6.78E-06 | 1.17E-07 | 5.656668 | 7.371771 | 4.49E-01 | NHP2 |
| 7963851 | 6.85E-06 | 1.19E-07 | 5.653779 | 7.359311 | 6.45E-01 | TESPA1 |
| 8167270 | 6.86E-06 | 1.19E-07 | 5.652924 | 7.355621 | 3.20E-01 | FTSJ1 |
| 8018600 | 6.98E-06 | 1.22E-07 | 5.648129 | 7.334948 | 3.80E-01 | SRP68 |
| 8070194 | 6.98E-06 | 1.22E-07 | -5.647628 | 7.332786 | -3.44E-01 | RUNX1 |
| 8119842 | 6.98E-06 | 1.23E-07 | 5.646205 | 7.326655 | 3.50E-01 | POLR1C |
| 7931353 | 6.98E-06 | 1.23E-07 | -5.645577 | 7.323946 | -3.50E-01 | PTPRE |
| 8078270 | 6.98E-06 | 1.23E-07 | 5.645387 | 7.323126 | 5.03E-01 | RPL15 |
| 8108558 | 7.05E-06 | 1.25E-07 | 5.642385 | 7.310192 | 3.49E-01 | SLC35A4 |
| 8167412 | 7.17E-06 | 1.27E-07 | 5.638378 | 7.292934 | 3.21E-01 | PQBP1 |
| 8019796 | 7.21E-06 | 1.29E-07 | -5.636167 | 7.283409 | -4.34E-01 | MAFG |
| 8062211 | 7.24E-06 | 1.30E-07 | 5.634737 | 7.277255 | 5.51E-01 | RPF2 |
| 7944667 | 7.35E-06 | 1.33E-07 | -5.629752 | 7.255798 | -6.79E-01 | SORL1 |
| 8123230 | 7.35E-06 | 1.33E-07 | -5.629373 | 7.254168 | -6.82E-01 | LOC729603 |
| 8032782 | 7.37E-06 | 1.34E-07 | 5.627853 | 7.247627 | 3.32E-01 | TMIGD2 |
| 8171001 | 7.37E-06 | 1.34E-07 | 5.627556 | 7.246351 | 3.94E-01 | FUNDC2 |
| 8063389 | 7.42E-06 | 1.35E-07 | -5.625132 | 7.23592 | -5.29E-01 | LINC01270 |
| 8066051 | 7.42E-06 | 1.35E-07 | 5.624968 | 7.235218 | 3.18E-01 | NDRG3 |
| 7935337 | 7.43E-06 | 1.36E-07 | -5.624043 | 7.231238 | -5.47E-01 | PIK3AP1 |
| 7931168 | 7.43E-06 | 1.36E-07 | 5.623722 | 7.229856 | 4.28E-01 | ACADSB |
| 8098121 | 7.44E-06 | 1.37E-07 | -5.622656 | 7.225274 | -4.63E-01 | RAPGEF2 |
| 8123232 | 7.44E-06 | 1.37E-07 | -5.622455 | 7.224408 | -5.06E-01 | SLC22A1 |
| 8021565 | 7.52E-06 | 1.39E-07 | -5.619618 | 7.212213 | -3.41E-01 | PHLPP1 |
| 8165217 | 7.59E-06 | 1.41E-07 | -5.616546 | 7.199008 | -4.79E-01 | NOTCH1 |
| 8094688 | 7.59E-06 | 1.41E-07 | 5.616289 | 7.197904 | 3.10E-01 | LIAS |
| 8078450 | 7.59E-06 | 1.41E-07 | 5.615908 | 7.196267 | 4.04E-01 | CRTAP |
| 8062623 | 7.75E-06 | 1.44E-07 | 5.610798 | 7.174314 | 5.40E-01 | PLCG1 |
| 7970455 | 7.78E-06 | 1.45E-07 | 5.609553 | 7.168965 | 3.53E-01 | CRYL1 |
| 8073578 | 7.78E-06 | 1.46E-07 | 5.608959 | 7.166413 | 3.91E-01 | SMDT1 |
| 8042588 | 7.90E-06 | 1.48E-07 | 5.605208 | 7.15031 | 4.76E-01 | MPHOSPH10 |
| 7944011 | 7.91E-06 | 1.49E-07 | 5.60431 | 7.146454 | 5.41E-01 | REXO2 |
| 7908614 | 7.96E-06 | 1.50E-07 | 5.601974 | 7.136431 | 5.75E-01 | CAMSAP2 |
| 8041206 | 7.96E-06 | 1.51E-07 | 5.600779 | 7.131303 | 5.71E-01 | LBH |
| 8062174 | 7.96E-06 | 1.51E-07 | 5.600222 | 7.12891 | 4.98E-01 | ERGIC3 |
| 8059071 | 8.00E-06 | 1.53E-07 | 5.59871 | 7.122424 | 3.34E-01 | NHEJ1 |
| 8145691 | 8.09E-06 | 1.54E-07 | 5.595996 | 7.110784 | 3.00E-01 | UBXN8 |
| 7931479 | 8.10E-06 | 1.55E-07 | -5.594512 | 7.104419 | -3.56E-01 | INPP5A |
| 8155200 | 8.10E-06 | 1.56E-07 | -5.594348 | 7.103714 | -5.37E-01 | CCIN |
| 8161919 | 8.24E-06 | 1.59E-07 | -5.590071 | 7.08538 | -4.34E-01 | TLE1 |
| 7946579 | 8.25E-06 | 1.59E-07 | -5.588995 | 7.080767 | -6.49E-01 | LYVE1 |
| 8113403 | 8.25E-06 | 1.60E-07 | 5.588767 | 7.079792 | 4.25E-01 | GIN1 |
| 8114733 | 8.25E-06 | 1.61E-07 | -5.587172 | 7.072955 | -3.99E-01 | ARAP3 |
| 8025728 | 8.25E-06 | 1.61E-07 | 5.586735 | 7.071082 | 3.14E-01 | QTRT1 |
| 7906622 | 8.25E-06 | 1.61E-07 | 5.586654 | 7.070737 | 5.30E-01 | LY9 |
| 8133345 | 8.33E-06 | 1.63E-07 | 5.58389 | 7.058894 | 3.49E-01 | WBSCR22 |
| 8089128 | 8.34E-06 | 1.63E-07 | 5.583318 | 7.056442 | 3.02E-01 | TOMM70 |
| 7909967 | 8.35E-06 | 1.64E-07 | 5.58249 | 7.052896 | 3.30E-01 | CAPN2 |
| 8022110 | 8.35E-06 | 1.64E-07 | 5.582093 | 7.051198 | 3.05E-01 | ZBTB14 |
| 8123181 | 8.41E-06 | 1.66E-07 | -5.580017 | 7.042307 | -5.75E-01 | IGF2R |
| 8096919 | 8.41E-06 | 1.66E-07 | -5.579286 | 7.039178 | -7.84E-01 | ALPK1 |
| 8026024 | 8.41E-06 | 1.67E-07 | 5.579162 | 7.038647 | 3.71E-01 | ASNA1 |
| 8136631 | 8.53E-06 | 1.71E-07 | 5.573473 | 7.014294 | 4.46E-01 | SSBP1 |
| 8042259 | 8.55E-06 | 1.72E-07 | 5.572592 | 7.010523 | 4.69E-01 | MDH1 |
| 8026926 | 8.55E-06 | 1.72E-07 | -5.572347 | 7.009474 | -3.66E-01 | MAST3 |
| 8070173 | 8.56E-06 | 1.73E-07 | -5.571259 | 7.004821 | -5.54E-01 | KCNE1 |
| 8110678 | 8.58E-06 | 1.73E-07 | 5.570256 | 7.000529 | 3.01E-01 | CCDC127 |
| 8138805 | 8.65E-06 | 1.75E-07 | 5.56771 | 6.989639 | 6.13E-01 | CPVL |
| 8018209 | 8.69E-06 | 1.77E-07 | 5.565945 | 6.98209 | 3.24E-01 | NAT9 |
| 7902594 | 8.69E-06 | 1.77E-07 | 5.565918 | 6.981978 | 5.42E-01 | PRKACB |
| 8051413 | 8.69E-06 | 1.77E-07 | 5.565446 | 6.97996 | 3.98E-01 | FAM98A |
| 8121757 | 8.95E-06 | 1.83E-07 | 5.557999 | 6.948127 | 3.87E-01 | HSF2 |
| 8118863 | 9.09E-06 | 1.87E-07 | -5.552962 | 6.926614 | -4.37E-01 | ANKS1A |
| 8101099 | 9.09E-06 | 1.87E-07 | 5.552904 | 6.926365 | 3.71E-01 | SDAD1 |
| 7996012 | 9.17E-06 | 1.90E-07 | 5.550288 | 6.915196 | 4.08E-01 | ARL2BP |
| 8043932 | 9.18E-06 | 1.90E-07 | 5.549631 | 6.91239 | 5.41E-01 | RPL31 |
| 7974352 | 9.18E-06 | 1.91E-07 | 5.548998 | 6.909687 | 4.16E-01 | C14orf166 |
| 7994572 | 9.18E-06 | 1.92E-07 | -5.54809 | 6.905811 | -3.03E-01 | SNX29P2 |
| 8160332 | 9.18E-06 | 1.92E-07 | 5.548003 | 6.905441 | 5.95E-01 | MLLT3 |
| 8049784 | 9.19E-06 | 1.92E-07 | 5.547418 | 6.902946 | 3.69E-01 | PPP1R7 |
| 8023481 | 9.22E-06 | 1.93E-07 | 5.54651 | 6.89907 | 3.08E-01 | NARS |
| 8149942 | 9.30E-06 | 1.95E-07 | 5.544074 | 6.888674 | 3.96E-01 | CCDC25 |
| 8128322 | 9.30E-06 | 1.95E-07 | 5.543871 | 6.887806 | 4.98E-01 | NDUFAF4 |
| 7945377 | 9.32E-06 | 1.96E-07 | 5.542785 | 6.883177 | 3.91E-01 | SIGIRR |
| 8169240 | 9.35E-06 | 1.98E-07 | 5.540832 | 6.874845 | 4.95E-01 | PRPS1 |
| 8136709 | 9.35E-06 | 1.98E-07 | -5.540454 | 6.873231 | -1.19 | MGAM2 |
| 8078173 | 9.40E-06 | 2.00E-07 | 5.538631 | 6.865456 | 5.17E-01 | OXNAD1 |
| 7973314 | 9.49E-06 | 2.02E-07 | 5.536027 | 6.854354 | 3.06E-01 | OXA1L |
| 8019478 | 9.55E-06 | 2.04E-07 | 5.533918 | 6.845364 | 3.45E-01 | CD7 |
| 8109750 | 9.62E-06 | 2.06E-07 | 5.531928 | 6.836882 | 6.91E-01 | RPLP0 |
| 8121515 | 9.70E-06 | 2.09E-07 | 5.529098 | 6.824824 | 4.56E-01 | SLC16A10 |
| 7966706 | 9.73E-06 | 2.10E-07 | -5.528112 | 6.820625 | -5.08E-01 | MED13L |
| 8061428 | 9.84E-06 | 2.12E-07 | 5.52533 | 6.808778 | 3.29E-01 | ENTPD6 |
| 8161017 | 9.88E-06 | 2.13E-07 | 5.52404 | 6.803282 | 5.64E-01 | SIT1 |
| 7985134 | 9.88E-06 | 2.14E-07 | 5.523895 | 6.802666 | 5.03E-01 | IDH3A |
| 7912086 | 1.02E-05 | 2.23E-07 | 5.514494 | 6.762656 | 3.48E-01 | NOL9 |
| 7920114 | 1.03E-05 | 2.24E-07 | 5.513748 | 6.759483 | 3.39E-01 | THEM4 |
| 8022972 | 1.04E-05 | 2.26E-07 | 5.510985 | 6.747733 | 6.24E-01 | RPL7A |
| 7948192 | 1.05E-05 | 2.29E-07 | 5.50807 | 6.73534 | 3.07E-01 | SSRP1 |
| 8145365 | 1.05E-05 | 2.32E-07 | -5.505881 | 6.726036 | -7.65E-01 | DOCK5 |
| 8026679 | 1.06E-05 | 2.33E-07 | 5.504686 | 6.720956 | 4.59E-01 | USE1 |
| 8161774 | 1.06E-05 | 2.35E-07 | -5.502466 | 6.711523 | -9.08E-01 | TRPM6 |
| 8065280 | 1.07E-05 | 2.37E-07 | -5.500455 | 6.70298 | -6.39E-01 | RALGAPA2 |
| 8174239 | 1.07E-05 | 2.38E-07 | 5.499783 | 6.700126 | 3.16E-01 | BEX2 |
| 8082229 | 1.08E-05 | 2.41E-07 | 5.496709 | 6.687074 | 3.46E-01 | UMPS |
| 8003773 | 1.09E-05 | 2.45E-07 | -5.493431 | 6.673159 | -3.16E-01 | RAP1GAP2 |
| 8143054 | 1.09E-05 | 2.45E-07 | 5.493266 | 6.672457 | 4.48E-01 | AKR1B1 |
| 7923233 | 1.10E-05 | 2.46E-07 | -5.492125 | 6.667613 | -3.54E-01 | KIF21B |
| 8043981 | 1.11E-05 | 2.49E-07 | -5.48948 | 6.656388 | -1.73 | IL1R2 |
| 8047865 | 1.11E-05 | 2.50E-07 | -5.488577 | 6.652561 | -4.63E-01 | PIKFYVE |
| 7975361 | 1.11E-05 | 2.52E-07 | -5.487043 | 6.64605 | -3.81E-01 | SUSD6 |
| 8157761 | 1.11E-05 | 2.52E-07 | -5.48699 | 6.645827 | -4.03E-01 | NEK6 |
| 8100532 | 1.12E-05 | 2.53E-07 | 5.485846 | 6.640973 | 3.06E-01 | NOA1 |
| 8048195 | 1.12E-05 | 2.55E-07 | 5.484602 | 6.635697 | 3.53E-01 | RPL37A |
| 8073039 | 1.13E-05 | 2.57E-07 | -5.482803 | 6.628071 | -3.02E-01 | GTPBP1 |
| 8146500 | 1.13E-05 | 2.59E-07 | -5.48078 | 6.619495 | -4.59E-01 | LYN |
| 8149475 | 1.14E-05 | 2.60E-07 | 5.480201 | 6.61704 | 3.21E-01 | CNOT7 |
| 8083709 | 1.14E-05 | 2.60E-07 | 5.479643 | 6.614676 | 5.13E-01 | SMC4 |
| 7950555 | 1.14E-05 | 2.61E-07 | -5.478906 | 6.611551 | -4.05E-01 | LRRC32 |
| 8148158 | 1.15E-05 | 2.63E-07 | 5.477232 | 6.604458 | 4.71E-01 | TBC1D31 |
| 7914643 | 1.15E-05 | 2.67E-07 | -5.473741 | 6.589668 | -3.42E-01 | A3GALT2 |
| 8179258 | 1.15E-05 | 2.67E-07 | 5.473649 | 6.589277 | 3.06E-01 | LTA |
| 7941927 | 1.16E-05 | 2.69E-07 | 5.472204 | 6.583155 | 3.79E-01 | AIP |
| 8027650 | 1.16E-05 | 2.69E-07 | 5.472198 | 6.583132 | 3.11E-01 | UBA2 |
| 8080781 | 1.16E-05 | 2.71E-07 | -5.470847 | 6.57741 | -3.08E-01 | PXK |
| 7955768 | 1.16E-05 | 2.71E-07 | 5.470442 | 6.575696 | 4.19E-01 | PFDN5 |
| 8014081 | 1.18E-05 | 2.76E-07 | 5.466203 | 6.557746 | 3.49E-01 | UTP6 |
| 7970162 | 1.18E-05 | 2.77E-07 | -5.465661 | 6.555455 | -5.59E-01 | ATP11A |
| 7925062 | 1.19E-05 | 2.82E-07 | -5.462163 | 6.540653 | -8.49E-01 | SIPA1L2 |
| 8117435 | 1.20E-05 | 2.83E-07 | 5.460816 | 6.534955 | 6.14E-01 | BTN3A2 |
| 8052654 | 1.20E-05 | 2.84E-07 | -5.460216 | 6.532417 | -5.50E-01 | PELI1 |
| 8016870 | 1.23E-05 | 2.91E-07 | 5.454589 | 6.508622 | 3.53E-01 | MRPS23 |
| 8147994 | 1.23E-05 | 2.92E-07 | 5.453649 | 6.504645 | 3.45E-01 | UTP23 |
| 8160670 | 1.24E-05 | 2.94E-07 | 5.452208 | 6.498558 | 4.69E-01 | AQP3 |
| 8014100 | 1.24E-05 | 2.97E-07 | 5.450429 | 6.491039 | 3.99E-01 | C17orf75 |
| 7944931 | 1.24E-05 | 2.97E-07 | 5.450426 | 6.491025 | 4.58E-01 | SLC37A2 |
| 8121734 | 1.24E-05 | 2.97E-07 | 5.449983 | 6.489153 | 5.63E-01 | ASF1A |
| 8041561 | 1.25E-05 | 3.01E-07 | 5.447406 | 6.478267 | 4.05E-01 | MORN2 |
| 8117622 | 1.27E-05 | 3.08E-07 | -5.442169 | 6.456151 | -3.89E-01 | OR2B6 |
| 8064833 | 1.29E-05 | 3.13E-07 | 5.438024 | 6.438651 | 3.13E-01 | TMEM230 |
| 8092691 | 1.30E-05 | 3.16E-07 | -5.435944 | 6.429876 | -7.42E-01 | BCL6 |
| 8139656 | 1.31E-05 | 3.20E-07 | -5.433059 | 6.417704 | -6.48E-01 | GRB10 |
| 8028219 | 1.31E-05 | 3.22E-07 | 5.432164 | 6.41393 | 4.36E-01 | ZNF420 |
| 8089988 | 1.32E-05 | 3.23E-07 | 5.431143 | 6.409623 | 3.60E-01 | CCDC58 |
| 8055606 | 1.32E-05 | 3.26E-07 | -5.429281 | 6.401774 | -4.14E-01 | GTDC1 |
| 7976826 | 1.32E-05 | 3.27E-07 | -5.428527 | 6.398595 | -3.78E-01 | SNORD114-26 |
| 8018169 | 1.33E-05 | 3.29E-07 | 5.427418 | 6.39392 | 4.46E-01 | CD300LB |
| 7999827 | 1.33E-05 | 3.30E-07 | 5.426426 | 6.38974 | 5.42E-01 | RPS15A |
| 8095697 | 1.34E-05 | 3.34E-07 | -5.424068 | 6.3798 | -6.41E-01 | CXCL1 |
| 8073799 | 1.34E-05 | 3.35E-07 | 5.423348 | 6.376766 | 3.08E-01 | ATXN10 |
| 7920047 | 1.34E-05 | 3.35E-07 | 5.423049 | 6.375506 | 4.54E-01 | MRPL9 |
| 8028916 | 1.34E-05 | 3.37E-07 | 5.421762 | 6.370086 | 3.49E-01 | SNRPA |
| 8026763 | 1.34E-05 | 3.38E-07 | 5.420801 | 6.366036 | 3.06E-01 | SLC27A1 |
| 7969533 | 1.34E-05 | 3.38E-07 | 5.420772 | 6.365916 | 3.84E-01 | SLAIN1 |
| 8050336 | 1.38E-05 | 3.49E-07 | 5.414142 | 6.337994 | 3.01E-01 | E2F6 |
| 8017212 | 1.38E-05 | 3.50E-07 | -5.413495 | 6.335271 | -4.45E-01 | USP32 |
| 7979516 | 1.39E-05 | 3.52E-07 | 5.411984 | 6.328915 | 3.30E-01 | TRMT5 |
| 7957633 | 1.39E-05 | 3.52E-07 | 5.411762 | 6.32798 | 4.19E-01 | METAP2 |
| 7947570 | 1.39E-05 | 3.53E-07 | -5.41097 | 6.324644 | -3.55E-01 | TP53I11 |
| 8002919 | 1.40E-05 | 3.56E-07 | 5.409539 | 6.318624 | 3.93E-01 | KARS |
| 8041763 | 1.40E-05 | 3.57E-07 | -5.408738 | 6.315253 | -3.91E-01 | PRKCE |
| 7902634 | 1.42E-05 | 3.62E-07 | 5.405611 | 6.302103 | 5.08E-01 | RPF1 |
| 8135497 | 1.42E-05 | 3.65E-07 | 5.403793 | 6.294456 | 4.56E-01 | ZNF277 |
| 7995712 | 1.44E-05 | 3.70E-07 | -5.400654 | 6.28126 | -8.17E-01 | CAPNS2 |
| 7912303 | 1.44E-05 | 3.71E-07 | 5.400229 | 6.279474 | 3.01E-01 | DFFA |
| 8055697 | 1.47E-05 | 3.81E-07 | 5.39416 | 6.253973 | 3.04E-01 | RBM43 |
| 7943605 | 1.47E-05 | 3.83E-07 | 5.393148 | 6.24972 | 4.01E-01 | ACAT1 |
| 7914648 | 1.48E-05 | 3.83E-07 | -5.392729 | 6.247964 | -3.72E-01 | PHC2 |
| 8162940 | 1.48E-05 | 3.85E-07 | -5.391873 | 6.244368 | -7.37E-01 | ABCA1 |
| 8034565 | 1.48E-05 | 3.86E-07 | 5.391052 | 6.24092 | 3.23E-01 | DNASE2 |
| 7940679 | 1.49E-05 | 3.89E-07 | 5.389389 | 6.233937 | 3.00E-01 | TTC9C |
| 8146685 | 1.49E-05 | 3.90E-07 | 5.388998 | 6.232298 | 4.10E-01 | RRS1 |
| 7934215 | 1.50E-05 | 3.93E-07 | 5.387216 | 6.224815 | 5.06E-01 | SPOCK2 |
| 8051226 | 1.51E-05 | 3.99E-07 | 5.383864 | 6.210747 | 4.84E-01 | TRMT61B |
| 8175039 | 1.52E-05 | 4.02E-07 | -5.38211 | 6.203388 | -3.39E-01 | ELF4 |
| 8122440 | 1.54E-05 | 4.06E-07 | 5.37983 | 6.193829 | 4.18E-01 | LTV1 |
| 8032576 | 1.56E-05 | 4.15E-07 | 5.374997 | 6.173563 | 4.34E-01 | AES |
| 8134460 | 1.57E-05 | 4.17E-07 | -5.373561 | 6.167545 | -4.29E-01 | FLJ30064 |
| 7915015 | 1.57E-05 | 4.20E-07 | 5.371919 | 6.160663 | 3.21E-01 | GNL2 |
| 7992811 | 1.58E-05 | 4.23E-07 | -5.370335 | 6.154025 | -8.18E-01 | MMP25 |
| 8012469 | 1.59E-05 | 4.26E-07 | 5.368923 | 6.14811 | 5.98E-01 | RPL26 |
| 8048940 | 1.61E-05 | 4.33E-07 | -5.364982 | 6.131604 | -4.02E-01 | SP100 |
| 7966183 | 1.61E-05 | 4.35E-07 | 5.364273 | 6.128637 | 3.22E-01 | ALKBH2 |
| 8146379 | 1.62E-05 | 4.37E-07 | 5.36331 | 6.124605 | 3.19E-01 | UBE2V2 |
| 7913357 | 1.63E-05 | 4.41E-07 | -5.361046 | 6.115127 | -4.28E-01 | ECE1 |
| 7920984 | 1.67E-05 | 4.53E-07 | 5.355145 | 6.090436 | 3.28E-01 | CCT3 |
| 8009366 | 1.67E-05 | 4.54E-07 | 5.354178 | 6.086392 | 3.96E-01 | NOL11 |
| 7969703 | 1.67E-05 | 4.57E-07 | 5.353096 | 6.08187 | 3.09E-01 | IPO5 |
| 8069744 | 1.67E-05 | 4.57E-07 | 5.353029 | 6.081588 | 4.77E-01 | RWDD2B |
| 7898549 | 1.70E-05 | 4.67E-07 | 5.348214 | 6.061458 | 4.41E-01 | MRTO4 |
| 8068401 | 1.70E-05 | 4.67E-07 | 5.348082 | 6.060905 | 4.14E-01 | CBR1 |
| 7976816 | 1.70E-05 | 4.68E-07 | -5.347578 | 6.058799 | -5.61E-01 | SNORD114-3 |
| 7991209 | 1.70E-05 | 4.69E-07 | 5.346966 | 6.056241 | 3.89E-01 | MRPL46 |
| 8007799 | 1.70E-05 | 4.70E-07 | 5.346483 | 6.054223 | 4.08E-01 | MGC57346 |
| 7915261 | 1.72E-05 | 4.76E-07 | 5.343519 | 6.041841 | 3.27E-01 | TRIT1 |
| 7936673 | 1.73E-05 | 4.78E-07 | 5.342515 | 6.037645 | 4.30E-01 | RGS10 |
| 8026868 | 1.73E-05 | 4.83E-07 | 5.340549 | 6.029434 | 5.81E-01 | RPL18A |
| 8121502 | 1.79E-05 | 5.00E-07 | 5.332365 | 5.995274 | 4.49E-01 | GTF3C6 |
| 8159977 | 1.83E-05 | 5.12E-07 | 5.327343 | 5.974325 | 3.79E-01 | RLN2 |
| 8114300 | 1.84E-05 | 5.17E-07 | 5.325055 | 5.964786 | 5.10E-01 | KLHL3 |
| 8048120 | 1.84E-05 | 5.19E-07 | 5.324202 | 5.961228 | 4.69E-01 | ATIC |
| 8023043 | 1.84E-05 | 5.19E-07 | -5.323858 | 5.959796 | -5.91E-01 | PSTPIP2 |
| 7938231 | 1.84E-05 | 5.21E-07 | 5.323043 | 5.956397 | 3.15E-01 | PPFIBP2 |
| 8046726 | 1.85E-05 | 5.25E-07 | -5.321536 | 5.950119 | -3.44E-01 | SSFA2 |
| 8169701 | 1.89E-05 | 5.35E-07 | 5.316927 | 5.930917 | 3.80E-01 | MCTS1 |
| 7938756 | 1.89E-05 | 5.37E-07 | 5.316157 | 5.927708 | 3.60E-01 | ST13P5 |
| 8086330 | 1.90E-05 | 5.41E-07 | -5.314542 | 5.920981 | -4.90E-01 | CSRNP1 |
| 8112961 | 1.91E-05 | 5.45E-07 | 5.312976 | 5.914462 | 5.60E-01 | RPS23 |
| 8096669 | 1.93E-05 | 5.53E-07 | -5.309726 | 5.900933 | -5.10E-01 | TET2 |
| 8129482 | 1.93E-05 | 5.55E-07 | 5.308882 | 5.897421 | 6.85E-01 | SAMD3 |
| 8180212 | 1.94E-05 | 5.56E-07 | 5.308399 | 5.895411 | 4.53E-01 | TBCA |
| 8145782 | 1.96E-05 | 5.65E-07 | 5.304636 | 5.879755 | 3.30E-01 | MAK16 |
| 8001782 | 2.01E-05 | 5.83E-07 | 5.297692 | 5.850885 | 5.24E-01 | RPS27A |
| 7993872 | 2.02E-05 | 5.84E-07 | 5.296998 | 5.848 | 3.63E-01 | UQCRC2 |
| 8073345 | 2.02E-05 | 5.86E-07 | -5.296494 | 5.845906 | -4.65E-01 | EP300 |
| 8132399 | 2.03E-05 | 5.89E-07 | 5.295284 | 5.840877 | 4.58E-01 | YAE1D1 |
| 8134699 | 2.03E-05 | 5.89E-07 | 5.295066 | 5.839972 | 3.98E-01 | COPS6 |
| 8103951 | 2.04E-05 | 5.93E-07 | -5.293844 | 5.834892 | -8.56E-01 | ACSL1 |
| 7975976 | 2.04E-05 | 5.93E-07 | 5.29364 | 5.834047 | 3.14E-01 | AHSA1 |
| 7929541 | 2.04E-05 | 5.97E-07 | -5.292142 | 5.827821 | -5.55E-01 | CC2D2B |
| 7940191 | 2.08E-05 | 6.08E-07 | -5.287881 | 5.810129 | -6.07E-01 | STX3 |
| 7990632 | 2.08E-05 | 6.11E-07 | -5.286962 | 5.806313 | -4.95E-01 | PEAK1 |
| 8076455 | 2.08E-05 | 6.16E-07 | 5.285154 | 5.798807 | 3.19E-01 | RRP7A |
| 8123038 | 2.08E-05 | 6.16E-07 | 5.284952 | 5.797971 | 3.07E-01 | GTF2H5 |
| 8151587 | 2.08E-05 | 6.16E-07 | 5.284842 | 5.797513 | 4.51E-01 | C8orf59 |
| 7909390 | 2.08E-05 | 6.16E-07 | -5.284841 | 5.797508 | -5.81E-01 | CR1L |
| 8021181 | 2.09E-05 | 6.19E-07 | 5.283928 | 5.793721 | 6.11E-01 | SCARNA17 |
| 7923659 | 2.09E-05 | 6.21E-07 | -5.283134 | 5.790427 | -3.20E-01 | PPP1R15B |
| 8052834 | 2.14E-05 | 6.37E-07 | 5.277208 | 5.765844 | 3.37E-01 | C2orf42 |
| 8131927 | 2.15E-05 | 6.40E-07 | 5.2763 | 5.762079 | 5.16E-01 | MPP6 |
| 8004133 | 2.16E-05 | 6.44E-07 | 5.275004 | 5.756705 | 3.04E-01 | RPAIN |
| 8039961 | 2.16E-05 | 6.44E-07 | 5.274683 | 5.755374 | 3.82E-01 | ACP1 |
| 8141846 | 2.17E-05 | 6.48E-07 | -5.273559 | 5.750716 | -6.57E-01 | FBXL13 |
| 7964460 | 2.17E-05 | 6.49E-07 | -5.273184 | 5.749161 | -3.24E-01 | DDIT3 |
| 8013965 | 2.18E-05 | 6.54E-07 | -5.271496 | 5.742162 | -5.17E-01 | SSH2 |
| 8101511 | 2.24E-05 | 6.75E-07 | -5.264189 | 5.711896 | -8.93E-01 | WDFY3 |
| 8068168 | 2.24E-05 | 6.75E-07 | 5.264093 | 5.711497 | 5.46E-01 | SOD1 |
| 8066444 | 2.24E-05 | 6.77E-07 | 5.263277 | 5.708122 | 3.08E-01 | LINC01260 |
| 8157246 | 2.27E-05 | 6.86E-07 | -5.26039 | 5.69617 | -3.88E-01 | KIAA1958 |
| 8005765 | 2.27E-05 | 6.86E-07 | -5.260257 | 5.695618 | -4.45E-01 | WSB1 |
| 8112312 | 2.27E-05 | 6.88E-07 | 5.259753 | 5.693531 | 3.58E-01 | DIMT1 |
| 8059565 | 2.27E-05 | 6.88E-07 | 5.259631 | 5.693025 | 4.69E-01 | PID1 |
| 8102817 | 2.27E-05 | 6.90E-07 | -5.258933 | 5.69014 | -3.28E-01 | ELF2 |
| 8146159 | 2.28E-05 | 6.96E-07 | 5.257109 | 5.682592 | 4.14E-01 | AP3M2 |
| 8027024 | 2.28E-05 | 6.96E-07 | 5.257106 | 5.682577 | 3.65E-01 | UBA52 |
| 8027642 | 2.28E-05 | 6.97E-07 | 5.256763 | 5.681161 | 3.21E-01 | PDCD2L |
| 8008151 | 2.28E-05 | 6.97E-07 | -5.256608 | 5.680517 | -3.78E-01 | IGF2BP1 |
| 7959623 | 2.28E-05 | 7.01E-07 | 5.255577 | 5.676255 | 4.19E-01 | GTF2H3 |
| 8058373 | 2.28E-05 | 7.01E-07 | 5.255485 | 5.675873 | 3.31E-01 | WDR12 |
| 8079392 | 2.29E-05 | 7.04E-07 | 5.254575 | 5.67211 | 6.23E-01 | CCR2 |
| 8166493 | 2.30E-05 | 7.08E-07 | 5.253225 | 5.666526 | 4.16E-01 | EIF2S3 |
| 8063351 | 2.30E-05 | 7.09E-07 | -5.253011 | 5.66564 | -4.19E-01 | SLC9A8 |
| 7976976 | 2.31E-05 | 7.11E-07 | -5.252259 | 5.662532 | -5.83E-01 | TECPR2 |
| 8085429 | 2.31E-05 | 7.12E-07 | -5.251956 | 5.661278 | -5.25E-01 | LOC100128644 |
| 8168087 | 2.32E-05 | 7.18E-07 | 5.249955 | 5.653003 | 4.86E-01 | IGBP1 |
| 8072757 | 2.32E-05 | 7.19E-07 | -5.249538 | 5.651279 | -5.94E-01 | CSF2RB |
| 7953111 | 2.33E-05 | 7.24E-07 | 5.248031 | 5.645051 | 3.17E-01 | ITFG2 |
| 8180269 | 2.33E-05 | 7.25E-07 | 5.247775 | 5.643992 | 4.45E-01 | TATDN1 |
| 7915733 | 2.34E-05 | 7.30E-07 | 5.246275 | 5.637794 | 3.74E-01 | PRDX1 |
| 8110055 | 2.34E-05 | 7.30E-07 | -5.24618 | 5.637404 | -6.21E-01 | CPEB4 |
| 7900146 | 2.35E-05 | 7.34E-07 | -5.244917 | 5.632185 | -3.42E-01 | ZC3H12A |
| 7918345 | 2.36E-05 | 7.38E-07 | 5.243811 | 5.627616 | 4.79E-01 | PSMA5 |
| 8137232 | 2.38E-05 | 7.46E-07 | 5.241234 | 5.616972 | 3.50E-01 | GIMAP8 |
| 8136602 | 2.38E-05 | 7.51E-07 | 5.239816 | 5.611114 | 3.17E-01 | NDUFB2 |
| 8149448 | 2.38E-05 | 7.54E-07 | 5.23883 | 5.607041 | 4.85E-01 | MSR1 |
| 8127498 | 2.42E-05 | 7.70E-07 | -5.234001 | 5.587113 | -3.07E-01 | MIR30C2 |
| 8132642 | 2.42E-05 | 7.71E-07 | 5.233552 | 5.585258 | 3.22E-01 | PPIA |
| 8152323 | 2.42E-05 | 7.72E-07 | 5.233195 | 5.583786 | 6.14E-01 | EIF3E |
| 8052866 | 2.42E-05 | 7.73E-07 | 5.233109 | 5.58343 | 3.04E-01 | FAM136A |
| 7980390 | 2.44E-05 | 7.79E-07 | -5.23114 | 5.575307 | -3.26E-01 | NOXRED1 |
| 8006627 | 2.45E-05 | 7.84E-07 | 5.229836 | 5.569927 | 4.00E-01 | ZNHIT3 |
| 7962455 | 2.47E-05 | 7.92E-07 | 5.227364 | 5.559734 | 8.32E-01 | NELL2 |
| 7948881 | 2.47E-05 | 7.94E-07 | 5.226917 | 5.55789 | 3.96E-01 | WDR74 |
| 8105181 | 2.48E-05 | 7.99E-07 | 5.225571 | 5.552342 | 3.75E-01 | MRPS30 |
| 7909601 | 2.48E-05 | 8.01E-07 | -5.224922 | 5.549664 | -7.08E-01 | SNORA16B |
| 8165995 | 2.50E-05 | 8.08E-07 | 5.222766 | 5.540779 | 3.99E-01 | HCCS |
| 7939087 | 2.50E-05 | 8.09E-07 | 5.222477 | 5.539588 | 4.23E-01 | ARL14EP |
| 8034698 | 2.52E-05 | 8.15E-07 | -5.220873 | 5.532981 | -4.44E-01 | MIR23A |
| 8164087 | 2.52E-05 | 8.16E-07 | -5.220488 | 5.531392 | -4.05E-01 | NR6A1 |
| 7956046 | 2.53E-05 | 8.20E-07 | 5.219624 | 5.527834 | 3.48E-01 | DGKA |
| 8018972 | 2.55E-05 | 8.29E-07 | -5.217102 | 5.517444 | -5.31E-01 | CEP295NL |
| 8095221 | 2.60E-05 | 8.50E-07 | 5.211092 | 5.492703 | 4.23E-01 | PAICS |
| 8001306 | 2.65E-05 | 8.69E-07 | -5.206173 | 5.472463 | -3.38E-01 | SIAH1 |
| 8108217 | 2.67E-05 | 8.76E-07 | 5.20438 | 5.465088 | 6.17E-01 | TGFBI |
| 8157941 | 2.68E-05 | 8.79E-07 | -5.203477 | 5.461376 | -3.44E-01 | ZBTB34 |
| 8146448 | 2.72E-05 | 8.96E-07 | 5.199126 | 5.443487 | 3.83E-01 | MRPL15 |
| 8118974 | 2.72E-05 | 8.97E-07 | 5.198811 | 5.442195 | 7.01E-01 | RPL10A |
| 8085081 | 2.73E-05 | 9.03E-07 | 5.197385 | 5.436335 | 3.43E-01 | CRBN |
| 7949490 | 2.74E-05 | 9.08E-07 | -5.195928 | 5.430346 | -5.16E-01 | AP5B1 |
| 8068422 | 2.74E-05 | 9.09E-07 | -5.195667 | 5.429274 | -3.38E-01 | DOPEY2 |
| 7950307 | 2.78E-05 | 9.29E-07 | 5.190833 | 5.40942 | 3.50E-01 | UCP2 |
| 8076209 | 2.78E-05 | 9.30E-07 | 5.190479 | 5.407968 | 4.50E-01 | RPL3 |
| 7969428 | 2.79E-05 | 9.35E-07 | 5.189229 | 5.402836 | 3.43E-01 | UCHL3 |
| 8134098 | 2.81E-05 | 9.44E-07 | -5.187086 | 5.394041 | -4.73E-01 | CDK14 |
| 8081343 | 2.81E-05 | 9.46E-07 | 5.186627 | 5.392155 | 3.44E-01 | TRMT10C |
| 8132964 | 2.81E-05 | 9.47E-07 | 5.18636 | 5.39106 | 3.62E-01 | SUMF2 |
| 7898939 | 2.82E-05 | 9.52E-07 | 5.18511 | 5.385929 | 3.91E-01 | NIPAL3 |
| 7905116 | 2.83E-05 | 9.56E-07 | 5.18424 | 5.382359 | 3.77E-01 | PLEKHO1 |
| 7983191 | 2.85E-05 | 9.66E-07 | 5.181724 | 5.372041 | 3.44E-01 | ADAL |
| 8042720 | 2.87E-05 | 9.72E-07 | 5.180236 | 5.365937 | 3.83E-01 | CCT7 |
| 7939265 | 2.89E-05 | 9.83E-07 | 5.177617 | 5.355197 | 3.20E-01 | NAT10 |
| 8155250 | 2.89E-05 | 9.84E-07 | 5.177407 | 5.354338 | 3.25E-01 | GRHPR |
| 7966202 | 2.89E-05 | 9.87E-07 | 5.176813 | 5.351904 | 3.09E-01 | KCTD10 |
| 8053288 | 2.90E-05 | 9.89E-07 | 5.176311 | 5.349844 | 3.57E-01 | GCFC2 |
| 7922040 | 2.90E-05 | 9.90E-07 | 5.176047 | 5.348761 | 5.44E-01 | CD247 |
| 7967084 | 2.92E-05 | 1.00E-06 | 5.173875 | 5.33986 | 3.91E-01 | POP5 |
| 7999149 | 2.92E-05 | 1.00E-06 | 5.173858 | 5.339789 | 3.03E-01 | NMRAL1 |
| 8172154 | 2.92E-05 | 1.00E-06 | 5.172653 | 5.334854 | 4.36E-01 | RPS2 |
| 8073032 | 2.94E-05 | 1.01E-06 | 5.171135 | 5.328637 | 4.15E-01 | TOMM22 |
| 7975224 | 2.94E-05 | 1.01E-06 | 5.171073 | 5.328382 | 3.51E-01 | EIF2S1 |
| 8172905 | 2.94E-05 | 1.02E-06 | 5.170257 | 5.325038 | 3.79E-01 | HSD17B10 |
| 7906041 | 2.95E-05 | 1.02E-06 | 5.169156 | 5.32053 | 3.50E-01 | DAP3 |
| 8123936 | 2.95E-05 | 1.02E-06 | -5.169041 | 5.320059 | -3.44E-01 | NEDD9 |
| 8072461 | 2.95E-05 | 1.02E-06 | -5.168945 | 5.319663 | -7.74E-01 | LIMK2 |
| 8164100 | 2.95E-05 | 1.02E-06 | 5.168746 | 5.318849 | 6.11E-01 | RPL35 |
| 8047381 | 2.98E-05 | 1.03E-06 | -5.16594 | 5.30736 | -3.78E-01 | CFLAR |
| 7909332 | 2.98E-05 | 1.04E-06 | -5.165613 | 5.306023 | -4.36E-01 | CD55 |
| 7954173 | 3.00E-05 | 1.05E-06 | 5.163479 | 5.297286 | 3.13E-01 | STRAP |
| 8043993 | 3.01E-05 | 1.05E-06 | -5.162862 | 5.294759 | -1.02 | LOC100131131 |
| 8040985 | 3.03E-05 | 1.06E-06 | 5.160823 | 5.286416 | 3.13E-01 | ZNF512 |
| 7969933 | 3.07E-05 | 1.08E-06 | 5.156715 | 5.269612 | 4.30E-01 | BIVM |
| 7964262 | 3.08E-05 | 1.08E-06 | 5.155903 | 5.266294 | 3.55E-01 | NACA |
| 8028172 | 3.08E-05 | 1.08E-06 | 5.155565 | 5.264909 | 3.10E-01 | CAPNS1 |
| 7928534 | 3.08E-05 | 1.08E-06 | -5.155015 | 5.262663 | -4.43E-01 | C10orf11 |
| 8005877 | 3.09E-05 | 1.09E-06 | 5.154434 | 5.260285 | 4.14E-01 | RPS7 |
| 8153903 | 3.09E-05 | 1.09E-06 | 5.153791 | 5.257657 | 3.95E-01 | RPL8 |
| 8081503 | 3.13E-05 | 1.11E-06 | 5.150207 | 5.243007 | 5.99E-01 | DZIP3 |
| 8169049 | 3.16E-05 | 1.12E-06 | 5.147203 | 5.230734 | 3.06E-01 | TCEAL1 |
| 8147344 | 3.16E-05 | 1.12E-06 | 5.146898 | 5.229491 | 3.05E-01 | PDP1 |
| 7975095 | 3.21E-05 | 1.14E-06 | -5.142832 | 5.212884 | -3.35E-01 | PLEKHG3 |
| 8140468 | 3.21E-05 | 1.15E-06 | -5.142424 | 5.21122 | -3.47E-01 | GSAP |
| 8036737 | 3.21E-05 | 1.15E-06 | 5.141797 | 5.20866 | 4.08E-01 | RPS16 |
| 7991386 | 3.21E-05 | 1.15E-06 | 5.141753 | 5.208479 | 3.27E-01 | CIB1 |
| 7943842 | 3.23E-05 | 1.16E-06 | 5.139751 | 5.200306 | 3.16E-01 | C11orf57 |
| 8117476 | 3.24E-05 | 1.16E-06 | 5.138654 | 5.195831 | 5.75E-01 | BTN3A3 |
| 8004867 | 3.25E-05 | 1.17E-06 | -5.137854 | 5.192564 | -3.14E-01 | NDEL1 |
| 8088384 | 3.30E-05 | 1.20E-06 | 5.132481 | 5.17065 | 3.57E-01 | PDHB |
| 8002312 | 3.30E-05 | 1.20E-06 | 5.131671 | 5.167345 | 4.56E-01 | NOB1 |
| 8021047 | 3.31E-05 | 1.20E-06 | -5.130936 | 5.164348 | -3.86E-01 | SETBP1 |
| 8023656 | 3.32E-05 | 1.21E-06 | 5.129996 | 5.160517 | 3.34E-01 | KDSR |
| 8058614 | 3.34E-05 | 1.22E-06 | 5.128315 | 5.153666 | 4.02E-01 | LANCL1 |
| 7971526 | 3.34E-05 | 1.22E-06 | -5.127838 | 5.15172 | -5.76E-01 | HTR2A |
| 8129379 | 3.34E-05 | 1.22E-06 | 5.127423 | 5.150031 | 4.19E-01 | ECHDC1 |
| 7983350 | 3.34E-05 | 1.22E-06 | 5.127162 | 5.148964 | 3.33E-01 | EIF3J |
| 7958666 | 3.35E-05 | 1.23E-06 | 5.125662 | 5.142852 | 3.17E-01 | FAM216A |
| 8045499 | 3.36E-05 | 1.24E-06 | 5.124517 | 5.138188 | 4.48E-01 | HNMT |
| 8029368 | 3.36E-05 | 1.24E-06 | 5.124449 | 5.137913 | 3.90E-01 | ZNF284 |
| 8121578 | 3.42E-05 | 1.26E-06 | 5.120009 | 5.11983 | 3.16E-01 | NT5DC1 |
| 8041617 | 3.43E-05 | 1.27E-06 | 5.119177 | 5.116439 | 3.90E-01 | MTA3 |
| 8022251 | 3.45E-05 | 1.27E-06 | -5.117569 | 5.109895 | -4.08E-01 | PPP4R1 |
| 8078984 | 3.45E-05 | 1.28E-06 | 5.11729 | 5.108758 | 3.16E-01 | RPL14 |
| 8000482 | 3.47E-05 | 1.28E-06 | -5.115875 | 5.102998 | -4.22E-01 | XPO6 |
| 8066038 | 3.50E-05 | 1.30E-06 | 5.113184 | 5.092051 | 5.22E-01 | SLA2 |
| 7915846 | 3.51E-05 | 1.30E-06 | -5.112411 | 5.088904 | -3.97E-01 | MKNK1 |
| 7933084 | 3.51E-05 | 1.31E-06 | -5.111645 | 5.085788 | -8.68E-01 | NAMPT |
| 7957540 | 3.52E-05 | 1.31E-06 | 5.110927 | 5.082869 | 4.35E-01 | MRPL42 |
| 8075798 | 3.58E-05 | 1.34E-06 | 5.106623 | 5.065366 | 3.90E-01 | EIF3D |
| 8093943 | 3.58E-05 | 1.34E-06 | 5.105671 | 5.061499 | 3.31E-01 | LOC93622 |
| 8091757 | 3.62E-05 | 1.36E-06 | 5.102287 | 5.047745 | 4.48E-01 | TRIM59 |
| 8123728 | 3.65E-05 | 1.37E-06 | 5.099934 | 5.038188 | 4.07E-01 | LYRM4 |
| 8080487 | 3.66E-05 | 1.38E-06 | -5.099066 | 5.034662 | -3.66E-01 | PRKCD |
| 8043278 | 3.67E-05 | 1.38E-06 | 5.098325 | 5.03165 | 4.27E-01 | MRPL35 |
| 8095139 | 3.67E-05 | 1.39E-06 | 5.097541 | 5.028467 | 4.23E-01 | SRD5A3 |
| 8023882 | 3.70E-05 | 1.40E-06 | -5.095686 | 5.020935 | -3.95E-01 | ZNF516 |
| 8088458 | 3.72E-05 | 1.41E-06 | 5.093957 | 5.013918 | 3.91E-01 | FHIT |
| 8063531 | 3.72E-05 | 1.41E-06 | -5.093373 | 5.011548 | -3.68E-01 | FAM209B |
| 7908988 | 3.73E-05 | 1.42E-06 | 5.092793 | 5.009191 | 3.83E-01 | SNRPE |
| 7958352 | 3.75E-05 | 1.43E-06 | 5.091133 | 5.002455 | 4.36E-01 | BTBD11 |
| 8103289 | 3.76E-05 | 1.44E-06 | 5.089318 | 4.995093 | 5.28E-01 | PLRG1 |
| 7901601 | 3.77E-05 | 1.44E-06 | 5.088761 | 4.992832 | 3.13E-01 | MRPL37 |
| 8000003 | 3.77E-05 | 1.44E-06 | 5.088468 | 4.991642 | 3.09E-01 | THUMPD1 |
| 8108321 | 3.79E-05 | 1.45E-06 | -5.086828 | 4.984992 | -3.90E-01 | FAM53C |
| 7999044 | 3.79E-05 | 1.46E-06 | -5.086554 | 4.98388 | -3.88E-01 | CREBBP |
| 8084092 | 3.83E-05 | 1.47E-06 | 5.083657 | 4.972137 | 4.70E-01 | NDUFB5 |
| 8034873 | 3.83E-05 | 1.47E-06 | -5.083575 | 4.971804 | -5.71E-01 | ADGRE2 |
| 8084173 | 3.84E-05 | 1.48E-06 | -5.082602 | 4.967858 | -4.28E-01 | ATP11B |
| 7928589 | 3.86E-05 | 1.49E-06 | -5.081136 | 4.961918 | -3.92E-01 | PPIF |
| 7957793 | 3.86E-05 | 1.49E-06 | 5.08085 | 4.960759 | 4.57E-01 | ACTR6 |
| 8000323 | 3.86E-05 | 1.49E-06 | 5.080831 | 4.96068 | 4.28E-01 | NDUFAB1 |
| 8019559 | 3.87E-05 | 1.50E-06 | -5.079687 | 4.956045 | -3.15E-01 | B3GNTL1 |
| 8003922 | 3.88E-05 | 1.50E-06 | 5.07931 | 4.954516 | 3.67E-01 | MED11 |
| 7939546 | 3.88E-05 | 1.51E-06 | -5.078601 | 4.951644 | -4.54E-01 | CD82 |
| 7979044 | 3.91E-05 | 1.52E-06 | -5.077139 | 4.945722 | -3.60E-01 | NIN |
| 8119357 | 3.91E-05 | 1.52E-06 | -5.07605 | 4.94131 | -7.42E-01 | DAAM2 |
| 8111203 | 3.92E-05 | 1.53E-06 | -5.075092 | 4.937433 | -4.15E-01 | LOC285696 |
| 8094759 | 3.92E-05 | 1.53E-06 | -5.074679 | 4.935759 | -7.61E-01 | NSUN7 |
| 8042040 | 3.94E-05 | 1.54E-06 | -5.073155 | 4.929588 | -3.42E-01 | EML6 |
| 8126524 | 3.95E-05 | 1.55E-06 | 5.072583 | 4.927273 | 3.72E-01 | DNPH1 |
| 7940781 | 4.00E-05 | 1.57E-06 | -5.068828 | 4.912076 | -5.12E-01 | RTN3 |
| 8151993 | 4.00E-05 | 1.57E-06 | 5.068691 | 4.911521 | 4.52E-01 | COX6C |
| 8104825 | 4.01E-05 | 1.58E-06 | 5.067142 | 4.905253 | 3.71E-01 | BRIX1 |
| 7905754 | 4.03E-05 | 1.59E-06 | 5.065722 | 4.899507 | 3.43E-01 | ATP8B2 |
| 8039017 | 4.07E-05 | 1.61E-06 | 5.06299 | 4.888458 | 3.47E-01 | ZNF816 |
| 8058147 | 4.10E-05 | 1.62E-06 | 5.061002 | 4.880421 | 4.39E-01 | PPIL3 |
| 8148501 | 4.11E-05 | 1.63E-06 | -5.059993 | 4.876341 | -3.59E-01 | PTP4A3 |
| 8117194 | 4.12E-05 | 1.64E-06 | 5.059452 | 4.874155 | 3.20E-01 | MRS2 |
| 7926345 | 4.13E-05 | 1.64E-06 | 5.058196 | 4.869079 | 3.32E-01 | RPP38 |
| 7970467 | 4.23E-05 | 1.69E-06 | 5.051587 | 4.842381 | 3.54E-01 | EEF1AKMT1 |
| 8164343 | 4.29E-05 | 1.72E-06 | 5.048025 | 4.828001 | 5.38E-01 | FAM102A |
| 8050689 | 4.29E-05 | 1.72E-06 | 5.047707 | 4.826714 | 3.60E-01 | WDCP |
| 8043909 | 4.29E-05 | 1.72E-06 | 5.047505 | 4.8259 | 3.24E-01 | NPAS2 |
| 8165974 | 4.34E-05 | 1.75E-06 | -5.043913 | 4.811405 | -4.41E-01 | CLCN4 |
| 8166243 | 4.34E-05 | 1.75E-06 | -5.043839 | 4.811108 | -5.78E-01 | REPS2 |
| 8005943 | 4.36E-05 | 1.76E-06 | 5.042383 | 4.805233 | 6.07E-01 | RPL23A |
| 8098177 | 4.37E-05 | 1.77E-06 | -5.041537 | 4.801823 | -5.78E-01 | KLHL2 |
| 7948679 | 4.37E-05 | 1.77E-06 | 5.041038 | 4.799812 | 3.49E-01 | EEF1G |
| 7967021 | 4.37E-05 | 1.77E-06 | -5.040754 | 4.798664 | -3.03E-01 | PXN |
| 8082504 | 4.38E-05 | 1.77E-06 | 5.040435 | 4.797378 | 3.80E-01 | HMCES |
| 8030908 | 4.39E-05 | 1.78E-06 | 5.039151 | 4.792202 | 3.70E-01 | ZNF480 |
| 8054329 | 4.39E-05 | 1.78E-06 | -5.039107 | 4.792023 | -4.32E-01 | RNF149 |
| 7920531 | 4.40E-05 | 1.79E-06 | -5.038367 | 4.789041 | -3.43E-01 | ADAR |
| 7917148 | 4.41E-05 | 1.80E-06 | 5.037286 | 4.784684 | 3.87E-01 | AIDA |
| 7924351 | 4.41E-05 | 1.80E-06 | 5.037269 | 4.784615 | 3.49E-01 | EPRS |
| 8037459 | 4.41E-05 | 1.80E-06 | 5.03699 | 4.783489 | 3.64E-01 | ZNF285 |
| 8180387 | 4.43E-05 | 1.81E-06 | 5.035618 | 4.777958 | 5.72E-01 | NME2 |
| 7956878 | 4.43E-05 | 1.81E-06 | -5.035363 | 4.776931 | -5.88E-01 | IRAK3 |
| 8073457 | 4.43E-05 | 1.81E-06 | 5.035188 | 4.776228 | 3.45E-01 | XRCC6 |
| 8135363 | 4.46E-05 | 1.83E-06 | -5.033515 | 4.769486 | -3.16E-01 | PIK3CG |
| 7996608 | 4.46E-05 | 1.83E-06 | 5.033073 | 4.767706 | 3.18E-01 | CARMIL2 |
| 8052250 | 4.51E-05 | 1.86E-06 | 5.029718 | 4.75419 | 3.00E-01 | MTIF2 |
| 8115584 | 4.53E-05 | 1.86E-06 | -5.028726 | 4.750196 | -5.51E-01 | CCNJL |
| 7948399 | 4.59E-05 | 1.90E-06 | -5.024233 | 4.732108 | -3.12E-01 | PATL1 |
| 8046628 | 4.59E-05 | 1.90E-06 | 5.024201 | 4.73198 | 3.32E-01 | RBM45 |
| 8038877 | 4.61E-05 | 1.91E-06 | -5.022878 | 4.726657 | -7.10E-01 | SIGLEC5 |
| 7982187 | 4.61E-05 | 1.91E-06 | 5.022634 | 4.725674 | 3.83E-01 | APBA2 |
| 8170166 | 4.64E-05 | 1.93E-06 | 5.020636 | 4.717635 | 3.43E-01 | HTATSF1 |
| 8180410 | 4.66E-05 | 1.94E-06 | 5.018946 | 4.710838 | 3.95E-01 | EIF3F |
| 8150962 | 4.68E-05 | 1.95E-06 | 5.017974 | 4.706931 | 5.46E-01 | TOX |
| 8151296 | 4.70E-05 | 1.96E-06 | 5.016517 | 4.701071 | 3.83E-01 | LACTB2 |
| 8130556 | 4.72E-05 | 1.98E-06 | -5.014898 | 4.694564 | -5.46E-01 | SOD2 |
| 7947245 | 4.72E-05 | 1.98E-06 | 5.014892 | 4.694539 | 4.05E-01 | HSP90AA2P |
| 7929116 | 4.75E-05 | 2.00E-06 | 5.012769 | 4.686005 | 3.12E-01 | RPP30 |
| 8055476 | 4.78E-05 | 2.01E-06 | 5.011139 | 4.679458 | 3.54E-01 | YWHAE |
| 7904364 | 4.84E-05 | 2.05E-06 | 5.00684 | 4.66219 | 3.53E-01 | WDR3 |
| 7922243 | 4.85E-05 | 2.05E-06 | 5.00608 | 4.659138 | 4.94E-01 | METTL18 |
| 7962842 | 4.89E-05 | 2.08E-06 | -5.003507 | 4.648809 | -4.26E-01 | ADCY6 |
| 8173917 | 4.91E-05 | 2.09E-06 | 5.001797 | 4.641946 | 3.43E-01 | NAP1L3 |
| 7950654 | 4.92E-05 | 2.09E-06 | 5.001552 | 4.640963 | 3.41E-01 | ALG8 |
| 7996934 | 4.92E-05 | 2.10E-06 | 5.000876 | 4.63825 | 3.45E-01 | NIP7 |
| 8030925 | 4.97E-05 | 2.12E-06 | 4.998518 | 4.628789 | 3.01E-01 | ZNF880 |
| 8059319 | 5.01E-05 | 2.14E-06 | 4.996391 | 4.620255 | 3.92E-01 | FARSB |
| 7935251 | 5.01E-05 | 2.14E-06 | 4.996277 | 4.619799 | 3.19E-01 | TCTN3 |
| 8019090 | 5.02E-05 | 2.15E-06 | -4.99538 | 4.616203 | -3.01E-01 | AATK |
| 8180392 | 5.05E-05 | 2.17E-06 | 4.993515 | 4.608725 | 3.09E-01 | TIMM8B |
| 8091658 | 5.05E-05 | 2.17E-06 | -4.993497 | 4.608653 | -3.45E-01 | CCNL1 |
| 7939424 | 5.06E-05 | 2.17E-06 | 4.992967 | 4.606528 | 3.15E-01 | API5 |
| 7980189 | 5.12E-05 | 2.21E-06 | -4.988854 | 4.590046 | -3.28E-01 | AREL1 |
| 8072488 | 5.14E-05 | 2.22E-06 | 4.987637 | 4.585171 | 3.71E-01 | DRG1 |
| 8028514 | 5.15E-05 | 2.23E-06 | 4.987167 | 4.583286 | 4.22E-01 | EIF3K |
| 8100085 | 5.15E-05 | 2.23E-06 | 4.987038 | 4.582771 | 4.71E-01 | GNPDA2 |
| 8073645 | 5.15E-05 | 2.23E-06 | 4.986411 | 4.580258 | 3.32E-01 | SAMM50 |
| 8047692 | 5.16E-05 | 2.23E-06 | 4.986174 | 4.579309 | 5.98E-01 | CTLA4 |
| 7900009 | 5.18E-05 | 2.25E-06 | -4.984729 | 4.573523 | -4.42E-01 | AGO4 |
| 8085026 | 5.20E-05 | 2.26E-06 | 4.983717 | 4.569468 | 4.13E-01 | RPL35A |
| 8100495 | 5.22E-05 | 2.27E-06 | 4.982559 | 4.564832 | 3.84E-01 | PPAT |
| 8115464 | 5.24E-05 | 2.28E-06 | 4.981106 | 4.559017 | 3.26E-01 | HAVCR2 |
| 7925184 | 5.25E-05 | 2.29E-06 | 4.98058 | 4.556913 | 3.44E-01 | RBM34 |
| 8068810 | 5.26E-05 | 2.30E-06 | -4.979461 | 4.552435 | -3.67E-01 | SLC37A1 |
| 8085407 | 5.29E-05 | 2.31E-06 | 4.978033 | 4.546717 | 3.03E-01 | RPL32 |
| 8142061 | 5.33E-05 | 2.34E-06 | 4.975601 | 4.536989 | 3.45E-01 | PUS7 |
| 7910640 | 5.35E-05 | 2.35E-06 | 4.974483 | 4.532517 | 3.16E-01 | GGPS1 |
| 8067680 | 5.35E-05 | 2.35E-06 | -4.974393 | 4.532158 | -3.65E-01 | HELZ2 |
| 7922462 | 5.38E-05 | 2.37E-06 | 4.97235 | 4.52399 | 3.63E-01 | MRPS14 |
| 8180407 | 5.41E-05 | 2.38E-06 | 4.970846 | 4.517978 | 3.95E-01 | NPM1 |
| 8072946 | 5.42E-05 | 2.39E-06 | 4.970013 | 4.514646 | 4.59E-01 | EIF3L |
| 7952986 | 5.43E-05 | 2.40E-06 | -4.969789 | 4.51375 | -7.91E-01 | WNK1 |
| 8172266 | 5.44E-05 | 2.40E-06 | -4.968944 | 4.510374 | -3.78E-01 | MIR221 |
| 7934384 | 5.46E-05 | 2.41E-06 | -4.967966 | 4.506465 | -3.62E-01 | MSS51 |
| 8084488 | 5.49E-05 | 2.44E-06 | 4.965696 | 4.497395 | 3.44E-01 | POLR2H |
| 7930703 | 5.50E-05 | 2.45E-06 | 4.964594 | 4.492995 | 3.31E-01 | TRUB1 |
| 7968242 | 5.52E-05 | 2.46E-06 | 4.963288 | 4.487776 | 4.28E-01 | GTF3A |
| 7971513 | 5.52E-05 | 2.47E-06 | 4.962605 | 4.485049 | 4.83E-01 | ESD |
| 8090256 | 5.62E-05 | 2.52E-06 | 4.95769 | 4.465428 | 3.05E-01 | SNX4 |
| 8134351 | 5.66E-05 | 2.55E-06 | -4.955374 | 4.456189 | -3.35E-01 | PPP1R9A |
| 7936463 | 5.66E-05 | 2.55E-06 | 4.955351 | 4.456098 | 4.61E-01 | ABLIM1 |
| 7914021 | 5.66E-05 | 2.55E-06 | -4.954777 | 4.453808 | -3.35E-01 | SLC9A1 |
| 8050908 | 5.68E-05 | 2.57E-06 | 4.953072 | 4.447006 | 3.03E-01 | HADHA |
| 7924107 | 5.68E-05 | 2.57E-06 | -4.953045 | 4.446896 | -3.47E-01 | LPGAT1 |
| 7897404 | 5.70E-05 | 2.58E-06 | 4.952134 | 4.443265 | 3.20E-01 | PARK7 |
| 7953100 | 5.70E-05 | 2.59E-06 | 4.951698 | 4.441527 | 3.22E-01 | FKBP4 |
| 7972217 | 5.71E-05 | 2.59E-06 | -4.95131 | 4.439979 | -3.15E-01 | SPRY2 |
| 7937150 | 5.71E-05 | 2.59E-06 | -4.951045 | 4.43892 | -5.17E-01 | ADAM8 |
| 7977119 | 5.77E-05 | 2.63E-06 | 4.947366 | 4.424256 | 3.06E-01 | APOPT1 |
| 8054308 | 5.77E-05 | 2.64E-06 | -4.947123 | 4.423287 | -6.36E-01 | TBC1D8 |
| 8114787 | 5.83E-05 | 2.67E-06 | 4.944371 | 4.41232 | 3.79E-01 | GNPDA1 |
| 7974835 | 5.94E-05 | 2.74E-06 | 4.938342 | 4.388311 | 5.89E-01 | PRKCH |
| 8180267 | 5.96E-05 | 2.74E-06 | -4.937723 | 4.385847 | -3.64E-01 | EPPK1 |
| 8050215 | 5.96E-05 | 2.75E-06 | 4.937387 | 4.38451 | 3.14E-01 | YWHAQ |
| 7986463 | 5.96E-05 | 2.75E-06 | -4.937149 | 4.383563 | -3.49E-01 | LRRK1 |
| 8064766 | 6.02E-05 | 2.78E-06 | -4.934254 | 4.37204 | -4.66E-01 | RNF24 |
| 8115666 | 6.05E-05 | 2.80E-06 | 4.932752 | 4.366067 | 3.29E-01 | NUDCD2 |
| 7897561 | 6.07E-05 | 2.82E-06 | -4.931156 | 4.359716 | -6.77E-01 | KIF1B |
| 7969171 | 6.07E-05 | 2.82E-06 | 4.931148 | 4.359687 | 3.61E-01 | DLEU1 |
| 8154836 | 6.09E-05 | 2.83E-06 | 4.930316 | 4.356377 | 3.71E-01 | ANXA2P2 |
| 7950671 | 6.11E-05 | 2.84E-06 | -4.929123 | 4.351633 | -4.66E-01 | GAB2 |
| 8149718 | 6.13E-05 | 2.86E-06 | -4.927656 | 4.3458 | -4.14E-01 | BIN3-IT1 |
| 7900488 | 6.13E-05 | 2.86E-06 | -4.927653 | 4.345791 | -4.69E-01 | MIR30E |
| 8113666 | 6.15E-05 | 2.87E-06 | -4.927003 | 4.343206 | -6.51E-01 | SEMA6A |
| 8113914 | 6.22E-05 | 2.91E-06 | -4.923564 | 4.329537 | -3.97E-01 | FNIP1 |
| 8031646 | 6.24E-05 | 2.93E-06 | 4.922267 | 4.324383 | 4.67E-01 | ZNF667-AS1 |
| 8065607 | 6.25E-05 | 2.93E-06 | -4.92176 | 4.322372 | -4.21E-01 | PLAGL2 |
| 7974387 | 6.25E-05 | 2.94E-06 | 4.921431 | 4.321062 | 3.29E-01 | STYX |
| 8050071 | 6.28E-05 | 2.96E-06 | 4.91981 | 4.314624 | 3.20E-01 | ADI1 |
| 7943552 | 6.30E-05 | 2.98E-06 | 4.918213 | 4.308284 | 3.52E-01 | AASDHPPT |
| 8108620 | 6.38E-05 | 3.02E-06 | 4.915036 | 4.295671 | 3.50E-01 | ZMAT2 |
| 7932109 | 6.45E-05 | 3.06E-06 | 4.911836 | 4.282975 | 3.17E-01 | SEPHS1 |
| 7952601 | 6.46E-05 | 3.07E-06 | 4.910899 | 4.279259 | 4.78E-01 | ETS1 |
| 7931268 | 6.46E-05 | 3.08E-06 | 4.910392 | 4.277247 | 3.58E-01 | BCCIP |
| 7926084 | 6.46E-05 | 3.08E-06 | 4.910364 | 4.277134 | 3.96E-01 | ATP5C1 |
| 8154670 | 6.51E-05 | 3.10E-06 | 4.908254 | 4.268767 | 4.06E-01 | IFT74 |
| 8034696 | 6.53E-05 | 3.12E-06 | -4.906815 | 4.263061 | -3.74E-01 | MIR27A |
| 8163775 | 6.58E-05 | 3.16E-06 | -4.904237 | 4.252842 | -4.99E-01 | MEGF9 |
| 8067248 | 6.64E-05 | 3.20E-06 | -4.900858 | 4.239453 | -4.52E-01 | PPP4R1L |
| 8074286 | 6.66E-05 | 3.22E-06 | -4.89935 | 4.233481 | -3.89E-01 | MICAL3 |
| 8078619 | 6.67E-05 | 3.23E-06 | -4.898543 | 4.230285 | -6.05E-01 | ITGA9 |
| 8180356 | 6.69E-05 | 3.25E-06 | 4.897625 | 4.226649 | 3.26E-01 | RPL7L1 |
| 7899737 | 6.72E-05 | 3.27E-06 | 4.89618 | 4.220927 | 4.54E-01 | EIF3I |
| 7920317 | 6.74E-05 | 3.29E-06 | 4.894658 | 4.214902 | 3.44E-01 | ILF2 |
| 8099541 | 6.81E-05 | 3.33E-06 | 4.891729 | 4.203309 | 3.03E-01 | QDPR |
| 8064967 | 6.85E-05 | 3.35E-06 | 4.890173 | 4.197153 | 3.71E-01 | MKKS |
| 8159732 | 6.85E-05 | 3.36E-06 | -4.889721 | 4.195365 | -5.04E-01 | EHMT1-IT1 |
| 8172244 | 6.87E-05 | 3.37E-06 | 4.888721 | 4.191411 | 3.11E-01 | FUNDC1 |
| 7965789 | 6.90E-05 | 3.41E-06 | 4.88618 | 4.181362 | 3.48E-01 | ARL1 |
| 7941946 | 6.92E-05 | 3.42E-06 | 4.885184 | 4.177423 | 3.25E-01 | NDUFV1 |
| 8169028 | 6.92E-05 | 3.42E-06 | 4.885036 | 4.176838 | 3.90E-01 | BEX3 |
| 8075924 | 6.93E-05 | 3.44E-06 | 4.883772 | 4.171841 | 3.93E-01 | MFNG |
| 8116086 | 6.93E-05 | 3.44E-06 | -4.883655 | 4.17138 | -3.49E-01 | DOK3 |
| 8158890 | 6.95E-05 | 3.46E-06 | -4.882709 | 4.167641 | -5.22E-01 | NTNG2 |
| 8093230 | 7.04E-05 | 3.51E-06 | -4.879009 | 4.153018 | -3.04E-01 | RUBCN |
| 8082012 | 7.06E-05 | 3.53E-06 | -4.877874 | 4.148537 | -5.94E-01 | SLC15A2 |
| 8030978 | 7.07E-05 | 3.54E-06 | 4.877119 | 4.145556 | 5.04E-01 | ZNF845 |
| 8077786 | 7.14E-05 | 3.59E-06 | -4.873734 | 4.13219 | -3.43E-01 | IRAK2 |
| 8106776 | 7.16E-05 | 3.60E-06 | 4.873147 | 4.129875 | 5.13E-01 | COX7C |
| 8039054 | 7.22E-05 | 3.64E-06 | 4.870493 | 4.1194 | 3.25E-01 | ZNF347 |
| 8136662 | 7.25E-05 | 3.66E-06 | -4.869182 | 4.114227 | -1.1 | MGAM |
| 8058477 | 7.30E-05 | 3.69E-06 | -4.867356 | 4.107025 | -3.03E-01 | KLF7 |
| 7960757 | 7.32E-05 | 3.70E-06 | -4.866535 | 4.103784 | -4.76E-01 | C1RL |
| 7964203 | 7.34E-05 | 3.71E-06 | -4.865586 | 4.100042 | -3.47E-01 | BAZ2A |
| 7909371 | 7.35E-05 | 3.72E-06 | -4.865401 | 4.099312 | -7.39E-01 | CR1 |
| 8103979 | 7.40E-05 | 3.75E-06 | 4.863292 | 4.090998 | 3.84E-01 | CFAP97 |
| 7914194 | 7.56E-05 | 3.85E-06 | 4.856834 | 4.065554 | 3.50E-01 | DNAJC8 |
| 8117106 | 7.59E-05 | 3.87E-06 | -4.855875 | 4.061774 | -5.49E-01 | RNF144B |
| 8108873 | 7.60E-05 | 3.88E-06 | -4.855199 | 4.059113 | -5.69E-01 | ARHGAP26 |
| 8057554 | 7.61E-05 | 3.89E-06 | 4.854586 | 4.056701 | 4.64E-01 | CACYBP |
| 8009075 | 7.67E-05 | 3.92E-06 | -4.852559 | 4.048718 | -4.57E-01 | TANC2 |
| 8151942 | 7.79E-05 | 4.00E-06 | 4.847476 | 4.028716 | 4.65E-01 | RIDA |
| 8030437 | 7.80E-05 | 4.02E-06 | 4.846627 | 4.025377 | 3.28E-01 | PRMT1 |
| 8099107 | 7.80E-05 | 4.02E-06 | 4.846313 | 4.024144 | 3.89E-01 | LYAR |
| 8089249 | 7.82E-05 | 4.04E-06 | 4.845638 | 4.021489 | 5.50E-01 | RPL24 |
| 8027448 | 7.87E-05 | 4.07E-06 | -4.843816 | 4.014322 | -4.17E-01 | DPY19L3 |
| 8057689 | 7.93E-05 | 4.12E-06 | 4.84093 | 4.002976 | 3.86E-01 | OSGEPL1 |
| 8089568 | 7.97E-05 | 4.14E-06 | 4.839218 | 3.99625 | 4.94E-01 | CD200R1 |
| 7933855 | 8.00E-05 | 4.17E-06 | 4.837917 | 3.991138 | 4.21E-01 | RTKN2 |
| 8180260 | 8.00E-05 | 4.17E-06 | 4.837719 | 3.990358 | 3.78E-01 | BANF1 |
| 8103415 | 8.06E-05 | 4.21E-06 | 4.83543 | 3.98137 | 6.06E-01 | FAM198B |
| 8151254 | 8.09E-05 | 4.24E-06 | -4.833981 | 3.97568 | -3.87E-01 | NCOA2 |
| 8163930 | 8.20E-05 | 4.30E-06 | 4.830304 | 3.961243 | 3.59E-01 | NDUFA8 |
| 8099841 | 8.24E-05 | 4.33E-06 | -4.82871 | 3.954988 | -4.63E-01 | TLR6 |
| 8088526 | 8.25E-05 | 4.34E-06 | 4.827903 | 3.951822 | 4.68E-01 | THOC7 |
| 7917359 | 8.25E-05 | 4.35E-06 | 4.827722 | 3.95111 | 4.83E-01 | ZNHIT6 |
| 8172358 | 8.25E-05 | 4.35E-06 | 4.827676 | 3.950933 | 4.39E-01 | UXT |
| 8019877 | 8.26E-05 | 4.35E-06 | -4.827367 | 3.949719 | -4.35E-01 | SMCHD1 |
| 8061447 | 8.26E-05 | 4.36E-06 | 4.827264 | 3.949315 | 3.21E-01 | PYGB |
| 8103859 | 8.35E-05 | 4.41E-06 | 4.824473 | 3.938367 | 3.06E-01 | DCTD |
| 8158714 | 8.44E-05 | 4.46E-06 | 4.821386 | 3.926266 | 3.19E-01 | EXOSC2 |
| 7945801 | 8.49E-05 | 4.50E-06 | 4.819714 | 3.919711 | 3.82E-01 | SNORA54 |
| 8071717 | 8.50E-05 | 4.50E-06 | -4.81937 | 3.918361 | -3.36E-01 | RGL4 |
| 8026193 | 8.51E-05 | 4.51E-06 | 4.8189 | 3.916522 | 3.47E-01 | C19orf53 |
| 8120967 | 8.54E-05 | 4.53E-06 | 4.817778 | 3.912125 | 5.45E-01 | NT5E |
| 8023855 | 8.67E-05 | 4.62E-06 | 4.81311 | 3.893838 | 4.04E-01 | CYB5A |
| 7904226 | 8.76E-05 | 4.69E-06 | -4.809735 | 3.880627 | -6.34E-01 | SLC22A15 |
| 7988467 | 8.77E-05 | 4.69E-06 | -4.809322 | 3.879011 | -5.64E-01 | FBN1 |
| 8177478 | 8.77E-05 | 4.69E-06 | 4.809272 | 3.878817 | 4.07E-01 | RAD17 |
| 8099897 | 8.78E-05 | 4.70E-06 | 4.808846 | 3.877148 | 4.15E-01 | UGDH |
| 7986132 | 8.78E-05 | 4.71E-06 | -4.808608 | 3.876218 | -3.28E-01 | MAN2A2 |
| 8087254 | 8.86E-05 | 4.76E-06 | 4.80604 | 3.866168 | 4.04E-01 | IMPDH2 |
| 7965515 | 8.90E-05 | 4.79E-06 | 4.804597 | 3.860526 | 3.84E-01 | NDUFA12 |
| 7924996 | 8.93E-05 | 4.81E-06 | 4.803382 | 3.855772 | 5.28E-01 | C1orf198 |
| 7988426 | 8.96E-05 | 4.83E-06 | 4.802585 | 3.852658 | 3.24E-01 | SLC30A4 |
| 7909285 | 8.97E-05 | 4.84E-06 | -4.801817 | 3.849655 | -7.92E-01 | PFKFB2 |
| 8143307 | 9.00E-05 | 4.87E-06 | -4.800515 | 3.844564 | -3.74E-01 | HIPK2 |
| 8126288 | 9.00E-05 | 4.87E-06 | -4.800393 | 3.844088 | -3.39E-01 | TREML2 |
| 7990033 | 9.02E-05 | 4.89E-06 | -4.799541 | 3.840758 | -3.79E-01 | TLE3 |
| 8115490 | 9.05E-05 | 4.91E-06 | -4.798514 | 3.836744 | -3.84E-01 | ADAM19 |
| 8009727 | 9.12E-05 | 4.95E-06 | 4.796441 | 3.828646 | 3.55E-01 | MRPL58 |
| 8047635 | 9.16E-05 | 4.98E-06 | 4.794881 | 3.822552 | 4.95E-01 | RPL12 |
| 7995697 | 9.23E-05 | 5.05E-06 | -4.791821 | 3.8106 | -5.45E-01 | LPCAT2 |
| 8141016 | 9.23E-05 | 5.05E-06 | 4.79178 | 3.810442 | 4.63E-01 | TFPI2 |
| 8095744 | 9.27E-05 | 5.07E-06 | -4.790588 | 3.805787 | -6.47E-01 | AREG |
| 7907911 | 9.32E-05 | 5.10E-06 | -4.789106 | 3.800003 | -4.47E-01 | CACNA1E |
| 7978932 | 9.35E-05 | 5.13E-06 | -4.787787 | 3.794856 | -4.50E-01 | SOS2 |
| 8158372 | 9.36E-05 | 5.14E-06 | 4.787231 | 3.792683 | 3.02E-01 | SET |
| 8056716 | 9.39E-05 | 5.17E-06 | 4.78597 | 3.787764 | 4.37E-01 | METTL5 |
| 8086150 | 9.39E-05 | 5.17E-06 | -4.785937 | 3.787638 | -4.42E-01 | LRRFIP2 |
| 8084739 | 9.39E-05 | 5.18E-06 | -4.785753 | 3.786917 | -6.24E-01 | FLJ42393 |
| 8175755 | 9.44E-05 | 5.22E-06 | 4.783833 | 3.779431 | 3.28E-01 | CETN2 |
| 7987163 | 9.56E-05 | 5.30E-06 | -4.779828 | 3.763814 | -5.52E-01 | FMN1 |
| 7987405 | 9.58E-05 | 5.32E-06 | 4.779216 | 3.76143 | 4.76E-01 | RASGRP1 |
| 8125752 | 9.64E-05 | 5.36E-06 | 4.77729 | 3.753925 | 3.16E-01 | CUTA |
| 7996772 | 9.70E-05 | 5.41E-06 | 4.775011 | 3.745044 | 3.95E-01 | SLC7A6 |
| 8120698 | 9.74E-05 | 5.43E-06 | 4.774006 | 3.741131 | 3.13E-01 | MTO1 |
| 8162276 | 9.74E-05 | 5.44E-06 | -4.773912 | 3.740764 | -5.76E-01 | NFIL3 |
| 8142019 | 9.76E-05 | 5.46E-06 | 4.772879 | 3.736739 | 3.29E-01 | ORC5 |
| 7919743 | 9.81E-05 | 5.50E-06 | -4.771117 | 3.729879 | -3.83E-01 | ADAMTSL4-AS1 |
| 8161147 | 9.81E-05 | 5.50E-06 | 4.771096 | 3.729798 | 3.82E-01 | HINT2 |
| 8107321 | 9.86E-05 | 5.53E-06 | 4.769557 | 3.723807 | 3.37E-01 | EPB41L4A-AS1 |
| 8130129 | 9.97E-05 | 5.63E-06 | 4.765457 | 3.707852 | 3.90E-01 | NUP43 |
| 8108568 | 1.00E-04 | 5.66E-06 | 4.764124 | 3.702668 | 3.13E-01 | IK |
| 8096411 | 1.00E-04 | 5.67E-06 | 4.763665 | 3.700883 | 3.39E-01 | TIGD2 |
| 7942932 | 1.02E-04 | 5.78E-06 | 4.758887 | 3.682306 | 3.24E-01 | HIKESHI |
| 7992795 | 1.02E-04 | 5.78E-06 | 4.758866 | 3.682222 | 3.11E-01 | THOC6 |
| 8106962 | 1.03E-04 | 5.87E-06 | 4.755253 | 3.668182 | 3.81E-01 | ARSK |
| 7993035 | 1.03E-04 | 5.88E-06 | -4.755056 | 3.66742 | -3.62E-01 | UBN1 |
| 7974870 | 1.03E-04 | 5.89E-06 | 4.754665 | 3.665902 | 3.11E-01 | SNAPC1 |
| 8117081 | 1.03E-04 | 5.91E-06 | -4.75365 | 3.661956 | -3.63E-01 | KDM1B |
| 7953965 | 1.04E-04 | 5.96E-06 | 4.7515 | 3.65361 | 4.48E-01 | LOC255308 |
| 8148317 | 1.06E-04 | 6.13E-06 | 4.744686 | 3.627164 | 3.25E-01 | MYC |
| 7921473 | 1.07E-04 | 6.17E-06 | -4.743181 | 3.621326 | -3.10E-01 | CFAP45 |
| 8030128 | 1.07E-04 | 6.21E-06 | -4.741659 | 3.615425 | -4.01E-01 | PPP1R15A |
| 8037642 | 1.10E-04 | 6.36E-06 | 4.7357 | 3.592328 | 4.38E-01 | SNRPD2 |
| 7943890 | 1.11E-04 | 6.46E-06 | -4.731861 | 3.57746 | -4.71E-01 | LOC100132686 |
| 7899774 | 1.12E-04 | 6.53E-06 | 4.72952 | 3.568396 | 3.13E-01 | HDAC1 |
| 8068105 | 1.12E-04 | 6.55E-06 | -4.728542 | 3.56461 | -4.29E-01 | BACH1 |
| 8125775 | 1.12E-04 | 6.58E-06 | 4.727651 | 3.56116 | 3.27E-01 | UQCC2 |
| 7942889 | 1.12E-04 | 6.58E-06 | 4.727442 | 3.560353 | 4.30E-01 | TMEM126A |
| 8028227 | 1.13E-04 | 6.62E-06 | 4.726236 | 3.555687 | 3.21E-01 | ZNF383 |
| 8079060 | 1.13E-04 | 6.62E-06 | 4.726223 | 3.555637 | 3.18E-01 | VIPR1 |
| 7898070 | 1.13E-04 | 6.64E-06 | -4.725259 | 3.551907 | -3.17E-01 | PRDM2 |
| 7901038 | 1.14E-04 | 6.70E-06 | 4.723126 | 3.543658 | 4.48E-01 | RPS8 |
| 7954810 | 1.14E-04 | 6.75E-06 | -4.721443 | 3.537147 | -5.25E-01 | LRRK2 |
| 7937476 | 1.15E-04 | 6.76E-06 | 4.720889 | 3.535008 | 5.31E-01 | RPLP2 |
| 7958346 | 1.15E-04 | 6.77E-06 | 4.720632 | 3.534013 | 3.40E-01 | TMEM263 |
| 8164692 | 1.15E-04 | 6.82E-06 | -4.718677 | 3.526456 | -8.65E-01 | RAPGEF1 |
| 8099235 | 1.16E-04 | 6.84E-06 | 4.718191 | 3.524578 | 3.21E-01 | MRFAP1L1 |
| 8064790 | 1.16E-04 | 6.85E-06 | -4.717795 | 3.523046 | -3.00E-01 | RASSF2 |
| 8175844 | 1.16E-04 | 6.86E-06 | 4.717531 | 3.522025 | 3.06E-01 | IDH3G |
| 8032149 | 1.17E-04 | 6.97E-06 | 4.713455 | 3.506281 | 3.68E-01 | POLR2E |
| 8080419 | 1.17E-04 | 6.98E-06 | 4.713348 | 3.505869 | 3.48E-01 | GNL3 |
| 7966035 | 1.17E-04 | 6.98E-06 | -4.713094 | 3.504886 | -4.61E-01 | CKAP4 |
| 8101622 | 1.17E-04 | 6.99E-06 | 4.712874 | 3.504036 | 3.55E-01 | TECR |
| 8111153 | 1.18E-04 | 7.03E-06 | -4.711481 | 3.498657 | -5.27E-01 | MYO10 |
| 8028266 | 1.19E-04 | 7.08E-06 | 4.709553 | 3.491214 | 3.12E-01 | ZNF540 |
| 8100145 | 1.20E-04 | 7.15E-06 | 4.707285 | 3.482459 | 3.69E-01 | COMMD8 |
| 8120961 | 1.20E-04 | 7.16E-06 | -4.706836 | 3.480729 | -4.12E-01 | MRAP2 |
| 8006531 | 1.20E-04 | 7.21E-06 | 4.705396 | 3.475173 | 4.72E-01 | SLFN5 |
| 8023261 | 1.21E-04 | 7.27E-06 | 4.703382 | 3.467405 | 3.01E-01 | ACAA2 |
| 8152867 | 1.22E-04 | 7.38E-06 | -4.699508 | 3.452465 | -4.69E-01 | ASAP1 |
| 7983828 | 1.22E-04 | 7.40E-06 | 4.69898 | 3.450433 | 3.03E-01 | TEX9 |
| 8099410 | 1.23E-04 | 7.44E-06 | -4.697775 | 3.445789 | -3.79E-01 | BOD1L1 |
| 7988286 | 1.24E-04 | 7.55E-06 | -4.694165 | 3.431879 | -3.01E-01 | SPG11 |
| 8001876 | 1.26E-04 | 7.62E-06 | 4.691632 | 3.422126 | 4.05E-01 | NAE1 |
| 7942586 | 1.26E-04 | 7.69E-06 | 4.689484 | 3.413856 | 4.02E-01 | RPS3 |
| 7951325 | 1.27E-04 | 7.72E-06 | 4.688693 | 3.410812 | 3.26E-01 | DCUN1D5 |
| 7967987 | 1.27E-04 | 7.73E-06 | 4.688306 | 3.409323 | 3.15E-01 | MRPL57 |
| 8042373 | 1.27E-04 | 7.77E-06 | 4.686954 | 3.404119 | 3.47E-01 | ETAA1 |
| 8077663 | 1.28E-04 | 7.84E-06 | 4.684704 | 3.395464 | 3.12E-01 | JAGN1 |
| 7912937 | 1.28E-04 | 7.87E-06 | -4.68397 | 3.392639 | -6.79E-01 | PADI2 |
| 7987192 | 1.30E-04 | 7.98E-06 | -4.680478 | 3.379213 | -4.48E-01 | SLC12A6 |
| 8022996 | 1.30E-04 | 8.02E-06 | -4.67927 | 3.374571 | -4.02E-01 | EPG5 |
| 7900201 | 1.31E-04 | 8.10E-06 | 4.676817 | 3.365145 | 3.98E-01 | UTP11 |
| 8042942 | 1.31E-04 | 8.13E-06 | -4.676057 | 3.362225 | -3.41E-01 | HK2 |
| 8122265 | 1.31E-04 | 8.14E-06 | -4.675719 | 3.360923 | -6.89E-01 | TNFAIP3 |
| 7996947 | 1.31E-04 | 8.14E-06 | 4.675666 | 3.360722 | 3.08E-01 | CYB5B |
| 7971653 | 1.34E-04 | 8.29E-06 | -4.671176 | 3.343478 | -5.17E-01 | DLEU2 |
| 7926677 | 1.34E-04 | 8.29E-06 | -4.671167 | 3.343444 | -3.87E-01 | OTUD1 |
| 7965565 | 1.34E-04 | 8.34E-06 | 4.669728 | 3.337921 | 3.23E-01 | USP44 |
| 8041542 | 1.34E-04 | 8.34E-06 | 4.669632 | 3.337552 | 3.44E-01 | GALM |
| 7955441 | 1.35E-04 | 8.42E-06 | 4.667377 | 3.328899 | 3.36E-01 | METTL7A |
| 7902425 | 1.35E-04 | 8.43E-06 | -4.667097 | 3.327823 | -4.91E-01 | ST6GALNAC3 |
| 7936320 | 1.36E-04 | 8.49E-06 | 4.665223 | 3.320634 | 4.08E-01 | RPL13AP6 |
| 8106193 | 1.36E-04 | 8.54E-06 | 4.6638 | 3.315176 | 4.31E-01 | UTP15 |
| 7935146 | 1.37E-04 | 8.60E-06 | 4.662186 | 3.308986 | 4.34E-01 | NOC3L |
| 7957052 | 1.37E-04 | 8.63E-06 | 4.661264 | 3.305451 | 4.11E-01 | CCT2 |
| 7958379 | 1.37E-04 | 8.65E-06 | 4.660854 | 3.303881 | 3.32E-01 | PWP1 |
| 8114396 | 1.37E-04 | 8.65E-06 | 4.66085 | 3.303864 | 3.05E-01 | CDC23 |
| 8043197 | 1.40E-04 | 8.84E-06 | 4.655283 | 3.282533 | 3.55E-01 | VAMP8 |
| 7990818 | 1.42E-04 | 8.96E-06 | -4.652019 | 3.270035 | -7.29E-01 | BCL2A1 |
| 8148263 | 1.42E-04 | 8.96E-06 | 4.65198 | 3.269883 | 3.20E-01 | TRMT12 |
| 7954196 | 1.42E-04 | 8.99E-06 | 4.651155 | 3.266725 | 4.37E-01 | MGST1 |
| 8003060 | 1.43E-04 | 9.05E-06 | 4.649595 | 3.260755 | 3.04E-01 | SDR42E1 |
| 8009913 | 1.43E-04 | 9.06E-06 | -4.649289 | 3.259585 | -3.78E-01 | MYO15B |
| 8018761 | 1.43E-04 | 9.09E-06 | -4.648539 | 3.256712 | -5.18E-01 | ST6GALNAC2 |
| 8156826 | 1.43E-04 | 9.10E-06 | -4.648341 | 3.255955 | -3.07E-01 | TGFBR1 |
| 7960865 | 1.43E-04 | 9.12E-06 | -4.647705 | 3.253523 | -4.33E-01 | SLC2A3 |
| 8111892 | 1.44E-04 | 9.15E-06 | 4.646871 | 3.250334 | 3.74E-01 | OXCT1 |
| 8095894 | 1.44E-04 | 9.15E-06 | 4.646832 | 3.250184 | 4.10E-01 | MRPL1 |
| 7913319 | 1.45E-04 | 9.25E-06 | -4.644382 | 3.240812 | -3.15E-01 | EIF4G3 |
| 7962951 | 1.45E-04 | 9.25E-06 | -4.644259 | 3.240339 | -3.74E-01 | KMT2D |
| 8097704 | 1.46E-04 | 9.32E-06 | 4.642482 | 3.233545 | 3.27E-01 | TMEM184C |
| 7978666 | 1.46E-04 | 9.38E-06 | 4.640926 | 3.227598 | 3.52E-01 | MBIP |
| 7912852 | 1.46E-04 | 9.38E-06 | 4.640774 | 3.227016 | 4.22E-01 | EIF1AX |
| 8040386 | 1.46E-04 | 9.42E-06 | 4.6398 | 3.223294 | 4.08E-01 | DDX1 |
| 8015445 | 1.47E-04 | 9.45E-06 | 4.639036 | 3.220374 | 3.60E-01 | NT5C3B |
| 8180325 | 1.47E-04 | 9.46E-06 | -4.638653 | 3.218913 | -4.45E-01 | BAGE5 |
| 7946516 | 1.47E-04 | 9.47E-06 | -4.638578 | 3.218625 | -5.07E-01 | SBF2 |
| 7917283 | 1.47E-04 | 9.47E-06 | -4.638352 | 3.217761 | -3.66E-01 | MCOLN2 |
| 8021453 | 1.47E-04 | 9.49E-06 | 4.637876 | 3.215941 | 3.02E-01 | SEC11C |
| 8109732 | 1.48E-04 | 9.56E-06 | 4.63618 | 3.209464 | 3.09E-01 | MAT2B |
| 8043995 | 1.50E-04 | 9.73E-06 | -4.631767 | 3.19261 | -7.93E-01 | IL1R1 |
| 7919197 | 1.51E-04 | 9.82E-06 | 4.629466 | 3.183828 | 3.12E-01 | POLR3GL |
| 8090678 | 1.52E-04 | 9.87E-06 | 4.628369 | 3.179645 | 3.49E-01 | MRPL3 |
| 8119237 | 1.52E-04 | 9.89E-06 | -4.627848 | 3.177656 | -3.43E-01 | LOC100132005 |
| 8006030 | 1.54E-04 | 1.00E-05 | -4.624625 | 3.165362 | -3.92E-01 | TAOK1 |
| 8025035 | 1.55E-04 | 1.01E-05 | 4.622538 | 3.157403 | 3.64E-01 | ALKBH7 |
| 7951068 | 1.55E-04 | 1.01E-05 | 4.622011 | 3.155395 | 3.06E-01 | CWC15 |
| 8054862 | 1.55E-04 | 1.01E-05 | -4.621565 | 3.153696 | -3.55E-01 | TMEM185B |
| 8034851 | 1.56E-04 | 1.02E-05 | -4.61946 | 3.145674 | -5.74E-01 | ADGRE3 |
| 7930454 | 1.57E-04 | 1.03E-05 | 4.618127 | 3.140596 | 4.59E-01 | PDCD4 |
| 7968417 | 1.57E-04 | 1.03E-05 | -4.618037 | 3.140251 | -5.10E-01 | FRY |
| 8077877 | 1.58E-04 | 1.04E-05 | -4.615824 | 3.131823 | -3.55E-01 | LOC100130924 |
| 8124402 | 1.58E-04 | 1.04E-05 | -4.615517 | 3.130653 | -3.72E-01 | HIST1H1T |
| 7968658 | 1.59E-04 | 1.05E-05 | 4.613091 | 3.121416 | 3.89E-01 | EXOSC8 |
| 8093156 | 1.59E-04 | 1.05E-05 | 4.612671 | 3.119818 | 3.46E-01 | NCBP2 |
| 8162502 | 1.59E-04 | 1.05E-05 | 4.612323 | 3.118492 | 3.47E-01 | FBP1 |
| 7978766 | 1.60E-04 | 1.06E-05 | 4.611345 | 3.11477 | 3.14E-01 | FKBP3 |
| 7980891 | 1.61E-04 | 1.06E-05 | 4.609557 | 3.107965 | 5.09E-01 | TC2N |
| 8042811 | 1.61E-04 | 1.07E-05 | -4.60875 | 3.104894 | -3.69E-01 | TET3 |
| 7979565 | 1.62E-04 | 1.07E-05 | 4.607746 | 3.101076 | 3.68E-01 | WDR89 |
| 7906564 | 1.64E-04 | 1.10E-05 | 4.602612 | 3.081554 | 3.58E-01 | PEA15 |
| 7944493 | 1.65E-04 | 1.10E-05 | -4.601189 | 3.076145 | -4.11E-01 | CBL |
| 8109350 | 1.66E-04 | 1.11E-05 | -4.598215 | 3.064845 | -3.97E-01 | SLC36A1 |
| 7970864 | 1.66E-04 | 1.12E-05 | 4.597877 | 3.063563 | 4.26E-01 | HSPH1 |
| 8086148 | 1.67E-04 | 1.12E-05 | 4.596987 | 3.06018 | 4.89E-01 | RPL29 |
| 8129627 | 1.68E-04 | 1.13E-05 | -4.594252 | 3.049794 | -8.53E-01 | VNN3 |
| 8009561 | 1.68E-04 | 1.14E-05 | 4.593681 | 3.047629 | 3.75E-01 | RPL38 |
| 7930537 | 1.69E-04 | 1.14E-05 | -4.592478 | 3.043061 | -5.14E-01 | TCF7L2 |
| 7929525 | 1.72E-04 | 1.17E-05 | -4.586388 | 3.019959 | -5.10E-01 | C10orf131 |
| 8040365 | 1.72E-04 | 1.18E-05 | 4.585162 | 3.015309 | 4.56E-01 | TRIB2 |
| 8007414 | 1.72E-04 | 1.18E-05 | -4.585055 | 3.014901 | -3.93E-01 | AOC2 |
| 8119000 | 1.73E-04 | 1.18E-05 | -4.584349 | 3.012226 | -4.60E-01 | MAPK14 |
| 8077858 | 1.73E-04 | 1.18E-05 | -4.583389 | 3.008588 | -3.27E-01 | ATG7 |
| 8114861 | 1.74E-04 | 1.19E-05 | 4.581955 | 3.003153 | 3.27E-01 | LARS |
| 8132943 | 1.74E-04 | 1.20E-05 | 4.580934 | 2.999285 | 3.31E-01 | CCT6A |
| 8031768 | 1.76E-04 | 1.20E-05 | 4.579061 | 2.99219 | 3.04E-01 | ZIK1 |
| 8113369 | 1.76E-04 | 1.21E-05 | -4.578633 | 2.990566 | -6.43E-01 | SLCO4C1 |
| 8059689 | 1.76E-04 | 1.21E-05 | 4.578542 | 2.990224 | 3.59E-01 | NCL |
| 7940372 | 1.76E-04 | 1.21E-05 | 4.578527 | 2.990166 | 3.10E-01 | TMEM109 |
| 7957032 | 1.76E-04 | 1.21E-05 | 4.578216 | 2.988986 | 3.23E-01 | YEATS4 |
| 7949146 | 1.76E-04 | 1.21E-05 | -4.577123 | 2.984847 | -3.11E-01 | SF1 |
| 8143988 | 1.76E-04 | 1.22E-05 | -4.576708 | 2.983276 | -5.60E-01 | KMT2C |
| 7978917 | 1.77E-04 | 1.22E-05 | -4.576134 | 2.981102 | -4.56E-01 | LINC01599 |
| 8043902 | 1.77E-04 | 1.22E-05 | 4.575387 | 2.978273 | 3.62E-01 | PDCL3 |
| 7929750 | 1.79E-04 | 1.24E-05 | -4.571711 | 2.964362 | -6.13E-01 | ENTPD7 |
| 8180398 | 1.80E-04 | 1.25E-05 | 4.569384 | 2.95556 | 3.92E-01 | RPS9 |
| 7930524 | 1.80E-04 | 1.25E-05 | -4.568943 | 2.95389 | -3.94E-01 | VTI1A |
| 8032834 | 1.81E-04 | 1.26E-05 | -4.568231 | 2.951199 | -5.80E-01 | LRG1 |
| 7902345 | 1.81E-04 | 1.26E-05 | 4.567894 | 2.949922 | 3.63E-01 | TYW3 |
| 8146579 | 1.83E-04 | 1.28E-05 | -4.564553 | 2.937291 | -4.12E-01 | CHD7 |
| 8050719 | 1.83E-04 | 1.28E-05 | -4.564515 | 2.937148 | -3.41E-01 | ITSN2 |
| 8044745 | 1.84E-04 | 1.28E-05 | 4.563383 | 2.932872 | 3.69E-01 | DDX18 |
| 8020630 | 1.84E-04 | 1.29E-05 | 4.562955 | 2.931254 | 3.39E-01 | TTC39C |
| 8083360 | 1.84E-04 | 1.29E-05 | -4.562766 | 2.930538 | -5.76E-01 | MED12L |
| 8102800 | 1.84E-04 | 1.29E-05 | -4.561937 | 2.927407 | -4.37E-01 | SLC7A11 |
| 8132347 | 1.84E-04 | 1.29E-05 | -4.561698 | 2.926503 | -7.07E-01 | GPR141 |
| 7938880 | 1.84E-04 | 1.29E-05 | 4.561576 | 2.926042 | 3.38E-01 | HTATIP2 |
| 7927669 | 1.84E-04 | 1.29E-05 | 4.561541 | 2.925909 | 3.93E-01 | TFAM |
| 7973414 | 1.85E-04 | 1.30E-05 | 4.559187 | 2.91702 | 3.04E-01 | NGDN |
| 8034299 | 1.85E-04 | 1.31E-05 | 4.559145 | 2.91686 | 3.24E-01 | ELOF1 |
| 8157270 | 1.86E-04 | 1.31E-05 | 4.558073 | 2.91281 | 3.14E-01 | SLC31A1 |
| 8001658 | 1.87E-04 | 1.32E-05 | 4.556615 | 2.907307 | 3.11E-01 | CFAP20 |
| 8093961 | 1.87E-04 | 1.32E-05 | -4.55612 | 2.905437 | -3.16E-01 | KIAA0232 |
| 7917954 | 1.87E-04 | 1.33E-05 | -4.555326 | 2.902439 | -3.53E-01 | FRRS1 |
| 7920659 | 1.88E-04 | 1.34E-05 | 4.552867 | 2.89316 | 3.09E-01 | KRTCAP2 |
| 8056545 | 1.91E-04 | 1.35E-05 | 4.549863 | 2.881829 | 3.13E-01 | STK39 |
| 8121251 | 1.91E-04 | 1.36E-05 | -4.548946 | 2.878369 | -4.21E-01 | LIN28B |
| 8013788 | 1.91E-04 | 1.36E-05 | -4.548629 | 2.877177 | -4.18E-01 | FLOT2 |
| 7951422 | 1.91E-04 | 1.36E-05 | 4.548308 | 2.875966 | 3.16E-01 | MSANTD4 |
| 8119223 | 1.91E-04 | 1.36E-05 | 4.548301 | 2.875937 | 4.42E-01 | LOC100505530 |
| 7996100 | 1.92E-04 | 1.37E-05 | -4.547097 | 2.871397 | -9.05E-01 | ADGRG3 |
| 7980990 | 1.92E-04 | 1.37E-05 | 4.546449 | 2.868956 | 3.96E-01 | GON7 |
| 8023252 | 1.93E-04 | 1.38E-05 | 4.545222 | 2.86433 | 3.64E-01 | RPL17 |
| 7990916 | 1.93E-04 | 1.38E-05 | 4.544962 | 2.863351 | 5.14E-01 | RPS17 |
| 8029392 | 1.93E-04 | 1.38E-05 | 4.544817 | 2.862805 | 3.37E-01 | ZNF234 |
| 8107859 | 1.94E-04 | 1.39E-05 | 4.542946 | 2.855753 | 3.88E-01 | LYRM7 |
| 8037045 | 1.94E-04 | 1.40E-05 | -4.542149 | 2.852751 | -5.04E-01 | CEACAM4 |
| 8116760 | 1.95E-04 | 1.40E-05 | 4.541971 | 2.85208 | 3.37E-01 | RIOK1 |
| 8043100 | 1.95E-04 | 1.40E-05 | 4.54092 | 2.848123 | 4.26E-01 | TMSB10 |
| 8057034 | 1.96E-04 | 1.41E-05 | 4.540024 | 2.844748 | 3.37E-01 | PRKRA |
| 8180350 | 1.96E-04 | 1.41E-05 | -4.539839 | 2.844051 | -3.54E-01 | BAGE |
| 8072626 | 1.98E-04 | 1.44E-05 | -4.535101 | 2.826217 | -6.22E-01 | TIMP3 |
| 7999419 | 1.99E-04 | 1.44E-05 | 4.533982 | 2.822007 | 3.45E-01 | DEXI |
| 8032284 | 2.00E-04 | 1.45E-05 | 4.532409 | 2.816089 | 3.54E-01 | UQCR11 |
| 7988605 | 2.00E-04 | 1.46E-05 | 4.53169 | 2.813383 | 4.17E-01 | COPS2 |
| 8124008 | 2.01E-04 | 1.46E-05 | 4.531262 | 2.811775 | 3.02E-01 | MCUR1 |
| 8124040 | 2.01E-04 | 1.46E-05 | -4.530406 | 2.808555 | -4.11E-01 | ATXN1 |
| 8111915 | 2.01E-04 | 1.47E-05 | 4.530279 | 2.808077 | 3.19E-01 | SEPP1 |
| 8129985 | 2.03E-04 | 1.48E-05 | -4.527352 | 2.797073 | -3.20E-01 | PLAGL1 |
| 8051573 | 2.06E-04 | 1.50E-05 | -4.523902 | 2.784109 | -4.00E-01 | CDC42EP3 |
| 8053584 | 2.06E-04 | 1.51E-05 | 4.523604 | 2.782991 | 4.16E-01 | CD8A |
| 8069633 | 2.06E-04 | 1.51E-05 | 4.522665 | 2.779461 | 3.23E-01 | ATP5J |
| 8137558 | 2.07E-04 | 1.52E-05 | -4.520813 | 2.772508 | -3.41E-01 | RBM33 |
| 8027674 | 2.09E-04 | 1.53E-05 | 4.518851 | 2.765142 | 3.42E-01 | ZNF302 |
| 7972745 | 2.10E-04 | 1.54E-05 | -4.517136 | 2.758704 | -3.15E-01 | IRS2 |
| 8001317 | 2.10E-04 | 1.55E-05 | -4.516825 | 2.757535 | -3.25E-01 | N4BP1 |
| 8005785 | 2.10E-04 | 1.55E-05 | -4.516788 | 2.757398 | -3.77E-01 | KSR1 |
| 7997740 | 2.11E-04 | 1.56E-05 | -4.515319 | 2.751885 | -3.12E-01 | MAP1LC3B |
| 7951467 | 2.12E-04 | 1.57E-05 | 4.513624 | 2.745528 | 3.73E-01 | ALKBH8 |
| 7975760 | 2.12E-04 | 1.57E-05 | 4.51355 | 2.745248 | 3.03E-01 | EIF2B2 |
| 7901110 | 2.13E-04 | 1.58E-05 | 4.511155 | 2.736266 | 3.47E-01 | AKR1A1 |
| 8036318 | 2.15E-04 | 1.60E-05 | 4.508115 | 2.724874 | 4.01E-01 | ZNF566 |
| 8031933 | 2.15E-04 | 1.60E-05 | 4.507994 | 2.72442 | 6.24E-01 | RPS5 |
| 8149264 | 2.18E-04 | 1.63E-05 | -4.504309 | 2.710612 | -4.97E-01 | PPP1R3B |
| 8116867 | 2.19E-04 | 1.63E-05 | 4.503073 | 2.705982 | 3.07E-01 | TMEM14B |
| 8085233 | 2.20E-04 | 1.65E-05 | 4.50098 | 2.698147 | 3.07E-01 | RPUSD3 |
| 8105067 | 2.20E-04 | 1.65E-05 | 4.500568 | 2.696606 | 3.21E-01 | PTGER4 |
| 7964271 | 2.21E-04 | 1.66E-05 | 4.499614 | 2.693035 | 3.74E-01 | PRIM1 |
| 8036309 | 2.21E-04 | 1.66E-05 | 4.498571 | 2.689128 | 3.18E-01 | ZFP82 |
| 8006634 | 2.22E-04 | 1.67E-05 | 4.496866 | 2.68275 | 3.39E-01 | PIGW |
| 7946589 | 2.24E-04 | 1.69E-05 | -4.494404 | 2.673541 | -3.14E-01 | MRVI1 |
| 8109802 | 2.24E-04 | 1.69E-05 | 4.494138 | 2.672545 | 3.28E-01 | RARS |
| 8038824 | 2.24E-04 | 1.69E-05 | -4.493992 | 2.672 | -4.49E-01 | SIGLEC10 |
| 8093074 | 2.27E-04 | 1.73E-05 | -4.489357 | 2.654673 | -3.30E-01 | ZDHHC19 |
| 8112045 | 2.29E-04 | 1.74E-05 | 4.487459 | 2.647581 | 3.48E-01 | ESM1 |
| 8007420 | 2.29E-04 | 1.74E-05 | -4.486699 | 2.644743 | -3.29E-01 | AOC3 |
| 8041781 | 2.32E-04 | 1.77E-05 | -4.483487 | 2.632747 | -3.57E-01 | EPAS1 |
| 8116520 | 2.32E-04 | 1.77E-05 | 4.482883 | 2.630491 | 3.84E-01 | RACK1 |
| 7954063 | 2.32E-04 | 1.77E-05 | 4.482437 | 2.628828 | 4.66E-01 | RPL13AP20 |
| 8180327 | 2.33E-04 | 1.79E-05 | -4.480687 | 2.622297 | -4.52E-01 | BAGE3 |
| 7976850 | 2.33E-04 | 1.79E-05 | -4.480537 | 2.621735 | -4.52E-01 | MIR154 |
| 8135235 | 2.34E-04 | 1.79E-05 | 4.479748 | 2.618793 | 3.20E-01 | PMPCB |
| 8041867 | 2.34E-04 | 1.79E-05 | 4.479612 | 2.618284 | 4.38E-01 | MSH2 |
| 7954729 | 2.34E-04 | 1.79E-05 | -4.479603 | 2.618248 | -5.26E-01 | FGD4 |
| 8180326 | 2.34E-04 | 1.79E-05 | -4.47947 | 2.617752 | -4.74E-01 | BAGE4 |
| 8035855 | 2.34E-04 | 1.80E-05 | 4.479268 | 2.617001 | 3.20E-01 | ZNF681 |
| 8036602 | 2.35E-04 | 1.81E-05 | 4.477234 | 2.609412 | 3.46E-01 | ECH1 |
| 8168416 | 2.35E-04 | 1.81E-05 | 4.476932 | 2.608285 | 5.29E-01 | USMG5 |
| 8043630 | 2.37E-04 | 1.83E-05 | -4.474617 | 2.599653 | -3.01E-01 | ARID5A |
| 7929288 | 2.38E-04 | 1.84E-05 | -4.472977 | 2.593537 | -3.49E-01 | EXOC6 |
| 8039006 | 2.38E-04 | 1.85E-05 | 4.472412 | 2.591432 | 3.35E-01 | ZNF320 |
| 8022424 | 2.40E-04 | 1.86E-05 | -4.470086 | 2.582763 | -5.15E-01 | NF1 |
| 7947221 | 2.41E-04 | 1.87E-05 | 4.468827 | 2.578075 | 3.63E-01 | LIN7C |
| 7951008 | 2.46E-04 | 1.93E-05 | 4.461696 | 2.551526 | 3.59E-01 | TAF1D |
| 8063453 | 2.47E-04 | 1.94E-05 | 4.460143 | 2.545748 | 3.65E-01 | PFDN4 |
| 8102567 | 2.49E-04 | 1.96E-05 | -4.45757 | 2.536175 | -5.31E-01 | PRDM5 |
| 8028186 | 2.49E-04 | 1.96E-05 | 4.456722 | 2.533023 | 3.49E-01 | ZNF146 |
| 8151561 | 2.50E-04 | 1.97E-05 | 4.455826 | 2.529692 | 4.51E-01 | ZFAND1 |
| 7906757 | 2.53E-04 | 2.00E-05 | -4.452426 | 2.517055 | -5.04E-01 | FCGR2A |
| 7942613 | 2.53E-04 | 2.00E-05 | -4.452221 | 2.516295 | -4.89E-01 | DGAT2 |
| 7909175 | 2.55E-04 | 2.02E-05 | -4.449576 | 2.506468 | -3.54E-01 | SRGAP2 |
| 8011542 | 2.55E-04 | 2.02E-05 | -4.449241 | 2.505224 | -3.21E-01 | ZZEF1 |
| 7960716 | 2.58E-04 | 2.04E-05 | 4.446893 | 2.496505 | 4.04E-01 | PHB2 |
| 8047518 | 2.58E-04 | 2.05E-05 | 4.446447 | 2.49485 | 3.86E-01 | NOP58 |
| 8021546 | 2.59E-04 | 2.05E-05 | -4.445477 | 2.491247 | -4.10E-01 | ZCCHC2 |
| 8076417 | 2.60E-04 | 2.07E-05 | 4.443521 | 2.483991 | 3.01E-01 | NDUFA6 |
| 8003068 | 2.61E-04 | 2.07E-05 | 4.443239 | 2.482943 | 3.75E-01 | MPHOSPH6 |
| 7989596 | 2.61E-04 | 2.08E-05 | -4.442603 | 2.480584 | -3.97E-01 | DAPK2 |
| 7980005 | 2.61E-04 | 2.08E-05 | -4.44184 | 2.477754 | -3.01E-01 | NUMB |
| 8104601 | 2.62E-04 | 2.09E-05 | -4.441496 | 2.476476 | -5.48E-01 | BASP1 |
| 8180328 | 2.67E-04 | 2.15E-05 | -4.434456 | 2.45038 | -4.78E-01 | BAGE2 |
| 8076128 | 2.70E-04 | 2.17E-05 | 4.431427 | 2.439159 | 3.13E-01 | JOSD1 |
| 8045816 | 2.70E-04 | 2.18E-05 | -4.430737 | 2.436601 | -3.97E-01 | GPD2 |
| 8180355 | 2.71E-04 | 2.18E-05 | 4.430131 | 2.43436 | 4.33E-01 | RPLP1 |
| 8168723 | 2.71E-04 | 2.18E-05 | -4.429925 | 2.433594 | -5.37E-01 | RPA4 |
| 7926037 | 2.76E-04 | 2.24E-05 | -4.423688 | 2.410514 | -7.10E-01 | PFKFB3 |
| 8141024 | 2.76E-04 | 2.24E-05 | 4.423484 | 2.409761 | 3.64E-01 | BET1 |
| 7969263 | 2.77E-04 | 2.24E-05 | 4.42303 | 2.40808 | 3.39E-01 | HNRNPA1L2 |
| 7975453 | 2.77E-04 | 2.25E-05 | -4.422315 | 2.405434 | -8.03E-01 | SNORD56B |
| 8162696 | 2.81E-04 | 2.29E-05 | 4.418181 | 2.390152 | 3.00E-01 | XPA |
| 8172035 | 2.84E-04 | 2.32E-05 | 4.414892 | 2.378 | 3.45E-01 | DYNLT3 |
| 7921319 | 2.84E-04 | 2.32E-05 | -4.414717 | 2.377355 | -5.66E-01 | FCRL1 |
| 7993167 | 2.85E-04 | 2.34E-05 | 4.412687 | 2.369858 | 4.52E-01 | ATF7IP2 |
| 8030997 | 2.86E-04 | 2.35E-05 | 4.411925 | 2.367043 | 3.45E-01 | ZNF813 |
| 7935462 | 2.86E-04 | 2.35E-05 | 4.411777 | 2.366495 | 3.23E-01 | EXOSC1 |
| 7909782 | 2.86E-04 | 2.35E-05 | 4.411458 | 2.365318 | 3.14E-01 | RRP15 |
| 7938366 | 2.87E-04 | 2.36E-05 | -4.410765 | 2.362759 | -3.81E-01 | WEE1 |
| 8103535 | 2.89E-04 | 2.37E-05 | -4.409152 | 2.356808 | -3.94E-01 | GK3P |
| 8016745 | 2.89E-04 | 2.38E-05 | -4.408402 | 2.354038 | -3.46E-01 | SPAG9 |
| 8045171 | 2.92E-04 | 2.41E-05 | 4.405423 | 2.343051 | 3.12E-01 | IMP4 |
| 7907790 | 2.94E-04 | 2.42E-05 | -4.403508 | 2.335986 | -4.15E-01 | CEP350 |
| 7936856 | 2.97E-04 | 2.46E-05 | -4.399981 | 2.322986 | -4.17E-01 | CHST15 |
| 8112302 | 2.98E-04 | 2.46E-05 | 4.399263 | 2.320341 | 3.28E-01 | SMIM15 |
| 8050160 | 2.98E-04 | 2.47E-05 | -4.398613 | 2.317944 | -5.02E-01 | MBOAT2 |
| 8083318 | 3.02E-04 | 2.51E-05 | -4.394774 | 2.303804 | -4.62E-01 | LOC646903 |
| 7938669 | 3.06E-04 | 2.55E-05 | 4.391015 | 2.289968 | 3.17E-01 | C11orf58 |
| 7908966 | 3.06E-04 | 2.56E-05 | -4.390069 | 2.286488 | -4.46E-01 | LINC00260 |
| 7958200 | 3.07E-04 | 2.56E-05 | -4.389836 | 2.28563 | -3.61E-01 | EID3 |
| 8142765 | 3.08E-04 | 2.57E-05 | -4.388178 | 2.279531 | -4.02E-01 | LRRC4 |
| 7956088 | 3.09E-04 | 2.58E-05 | -4.387189 | 2.275894 | -3.08E-01 | RAB5B |
| 8013319 | 3.09E-04 | 2.58E-05 | 4.387176 | 2.275848 | 4.85E-01 | GRAP |
| 8094596 | 3.09E-04 | 2.59E-05 | -4.386999 | 2.275194 | -6.53E-01 | PTTG2 |
| 8032480 | 3.09E-04 | 2.59E-05 | 4.386213 | 2.272303 | 3.01E-01 | LSM7 |
| 7907847 | 3.11E-04 | 2.61E-05 | -4.384454 | 2.26584 | -3.26E-01 | LOC100506242 |
| 8042503 | 3.11E-04 | 2.62E-05 | -4.383928 | 2.263904 | -5.73E-01 | MXD1 |
| 8112220 | 3.12E-04 | 2.63E-05 | -4.382826 | 2.259853 | -3.83E-01 | PDE4D |
| 8156750 | 3.15E-04 | 2.65E-05 | 4.380695 | 2.252025 | 3.08E-01 | ANP32B |
| 8001924 | 3.15E-04 | 2.65E-05 | 4.380417 | 2.251001 | 3.01E-01 | FAM96B |
| 8171823 | 3.16E-04 | 2.67E-05 | 4.379303 | 2.246912 | 3.44E-01 | APOO |
| 8103769 | 3.17E-04 | 2.68E-05 | 4.377842 | 2.241544 | 4.62E-01 | HPGD |
| 8050608 | 3.17E-04 | 2.69E-05 | 4.377303 | 2.239568 | 3.23E-01 | LDAH |
| 8112940 | 3.18E-04 | 2.70E-05 | 4.376224 | 2.235605 | 4.12E-01 | SSBP2 |
| 8160912 | 3.24E-04 | 2.76E-05 | -4.370813 | 2.215748 | -3.89E-01 | C9orf131 |
| 8118242 | 3.24E-04 | 2.76E-05 | -4.370151 | 2.213319 | -3.60E-01 | LY6G6D |
| 7914940 | 3.25E-04 | 2.77E-05 | 4.369634 | 2.211424 | 3.91E-01 | MRPS15 |
| 8168438 | 3.25E-04 | 2.77E-05 | 4.369212 | 2.209877 | 3.28E-01 | UPRT |
| 8040503 | 3.25E-04 | 2.78E-05 | 4.369003 | 2.209109 | 3.25E-01 | UBXN2A |
| 8038086 | 3.30E-04 | 2.83E-05 | 4.364074 | 2.191045 | 4.02E-01 | RPL18 |
| 7925531 | 3.30E-04 | 2.83E-05 | 4.364022 | 2.190853 | 4.37E-01 | AKT3 |
| 7943715 | 3.30E-04 | 2.83E-05 | -4.36402 | 2.190845 | -4.63E-01 | ZC3H12C |
| 8082035 | 3.30E-04 | 2.84E-05 | 4.363427 | 2.188672 | 4.25E-01 | CD86 |
| 8127698 | 3.31E-04 | 2.85E-05 | -4.362409 | 2.184944 | -3.75E-01 | PHIP |
| 7907531 | 3.33E-04 | 2.87E-05 | -4.360844 | 2.179213 | -7.36E-01 | GPR52 |
| 8132929 | 3.34E-04 | 2.88E-05 | 4.359986 | 2.17607 | 3.09E-01 | GBAS |
| 7948332 | 3.34E-04 | 2.88E-05 | 4.359618 | 2.174724 | 3.45E-01 | LPXN |
| 7909946 | 3.37E-04 | 2.92E-05 | -4.356497 | 2.1633 | -3.91E-01 | FAM177B |
| 8171034 | 3.39E-04 | 2.94E-05 | -4.354257 | 2.155101 | -3.22E-01 | SPRY3 |
| 7913001 | 3.43E-04 | 2.98E-05 | -4.351288 | 2.144245 | -3.72E-01 | UBR4 |
| 7898875 | 3.45E-04 | 3.00E-05 | 4.348857 | 2.135359 | 4.21E-01 | RPL11 |
| 8008900 | 3.50E-04 | 3.06E-05 | -4.344288 | 2.118665 | -5.45E-01 | CA4 |
| 8017312 | 3.55E-04 | 3.10E-05 | -4.340454 | 2.104665 | -3.18E-01 | MED13 |
| 7912292 | 3.58E-04 | 3.14E-05 | 4.3375 | 2.093886 | 3.03E-01 | LZIC |
| 7901418 | 3.61E-04 | 3.18E-05 | 4.334512 | 2.082989 | 3.56E-01 | BTF3L4 |
| 8088020 | 3.62E-04 | 3.20E-05 | -4.332576 | 2.075931 | -3.00E-01 | ITIH4 |
| 8053165 | 3.63E-04 | 3.21E-05 | 4.331912 | 2.073509 | 3.81E-01 | MRPL53 |
| 7950248 | 3.63E-04 | 3.22E-05 | -4.331382 | 2.071579 | -3.21E-01 | FCHSD2 |
| 8064302 | 3.64E-04 | 3.22E-05 | 4.330853 | 2.06965 | 3.42E-01 | PCMTD2 |
| 8047161 | 3.64E-04 | 3.23E-05 | -4.33048 | 2.068292 | -4.85E-01 | NABP1 |
| 7990815 | 3.65E-04 | 3.24E-05 | -4.329656 | 2.06529 | -3.72E-01 | ST20 |
| 8145291 | 3.65E-04 | 3.24E-05 | -4.329409 | 2.06439 | -6.81E-01 | SLC25A37 |
| 7935910 | 3.66E-04 | 3.25E-05 | -4.328709 | 2.061838 | -3.13E-01 | MGEA5 |
| 8011680 | 3.69E-04 | 3.29E-05 | -4.325793 | 2.051219 | -6.10E-01 | ALOX15 |
| 8077528 | 3.71E-04 | 3.31E-05 | -4.324241 | 2.045567 | -3.86E-01 | SETD5 |
| 8044049 | 3.71E-04 | 3.31E-05 | -4.32412 | 2.045129 | -7.97E-01 | IL18RAP |
| 8069541 | 3.73E-04 | 3.33E-05 | -4.322367 | 2.038747 | -5.50E-01 | SAMSN1 |
| 8101260 | 3.73E-04 | 3.33E-05 | -4.322263 | 2.038366 | -3.76E-01 | ANTXR2 |
| 8125556 | 3.75E-04 | 3.36E-05 | 4.320313 | 2.031271 | 5.69E-01 | HLA-DPA1 |
| 8085716 | 3.75E-04 | 3.36E-05 | 4.320191 | 2.030831 | 4.33E-01 | SATB1 |
| 7967463 | 3.76E-04 | 3.36E-05 | -4.319751 | 2.029228 | -3.09E-01 | RILPL1 |
| 8107282 | 3.76E-04 | 3.36E-05 | 4.319713 | 2.029091 | 3.11E-01 | WDR36 |
| 8056327 | 3.76E-04 | 3.37E-05 | 4.319048 | 2.026672 | 4.24E-01 | GRB14 |
| 8103601 | 3.77E-04 | 3.38E-05 | -4.318205 | 2.023605 | -5.78E-01 | DDX60L |
| 8113413 | 3.77E-04 | 3.39E-05 | 4.318107 | 2.023249 | 3.85E-01 | NUDT12 |
| 8058415 | 3.83E-04 | 3.45E-05 | -4.313332 | 2.005892 | -3.40E-01 | INO80D |
| 8027241 | 3.83E-04 | 3.45E-05 | 4.313244 | 2.005571 | 3.71E-01 | ZNF253 |
| 8103998 | 3.86E-04 | 3.49E-05 | 4.31046 | 1.995456 | 3.48E-01 | UFSP2 |
| 7905733 | 3.87E-04 | 3.50E-05 | 4.309341 | 1.991395 | 3.38E-01 | HAX1 |
| 8138912 | 3.99E-04 | 3.63E-05 | 4.30031 | 1.958622 | 3.88E-01 | LSM5 |
| 7963614 | 4.01E-04 | 3.64E-05 | 4.299305 | 1.954979 | 4.38E-01 | ITGB7 |
| 7947624 | 4.01E-04 | 3.65E-05 | -4.298532 | 1.952177 | -3.43E-01 | PHF21A |
| 8125530 | 4.04E-04 | 3.68E-05 | 4.296447 | 1.944618 | 4.64E-01 | HLA-DMB |
| 7918902 | 4.04E-04 | 3.69E-05 | -4.296153 | 1.943554 | -3.55E-01 | CD58 |
| 7919971 | 4.04E-04 | 3.69E-05 | 4.296125 | 1.943454 | 3.04E-01 | RFX5 |
| 8147580 | 4.07E-04 | 3.71E-05 | -4.294198 | 1.936472 | -4.71E-01 | VPS13B |
| 7981984 | 4.10E-04 | 3.75E-05 | 4.291927 | 1.928247 | 3.55E-01 | SNORD116-18 |
| 7990027 | 4.10E-04 | 3.76E-05 | -4.291245 | 1.925776 | -5.82E-01 | ANP32A-IT1 |
| 8035829 | 4.12E-04 | 3.77E-05 | 4.290161 | 1.921853 | 4.85E-01 | RPL34 |
| 7922504 | 4.14E-04 | 3.80E-05 | -4.288269 | 1.915006 | -3.53E-01 | RFWD2 |
| 7950683 | 4.14E-04 | 3.80E-05 | 4.288073 | 1.914295 | 3.07E-01 | NARS2 |
| 7954293 | 4.17E-04 | 3.84E-05 | -4.285798 | 1.906067 | -6.45E-01 | PDE3A |
| 8038954 | 4.23E-04 | 3.90E-05 | 4.28175 | 1.89143 | 3.09E-01 | ZNF616 |
| 8027701 | 4.23E-04 | 3.90E-05 | -4.281639 | 1.891026 | -3.65E-01 | GRAMD1A |
| 7986092 | 4.27E-04 | 3.95E-05 | -4.278563 | 1.87991 | -3.20E-01 | FURIN |
| 7987369 | 4.28E-04 | 3.96E-05 | 4.277979 | 1.8778 | 4.18E-01 | DPH6 |
| 8081612 | 4.30E-04 | 3.98E-05 | 4.27632 | 1.871809 | 3.73E-01 | ABHD10 |
| 7898278 | 4.30E-04 | 3.98E-05 | -4.276126 | 1.871109 | -3.37E-01 | SPEN |
| 7981111 | 4.31E-04 | 3.99E-05 | -4.275941 | 1.870438 | -4.05E-01 | DICER1 |
| 8107578 | 4.32E-04 | 4.01E-05 | 4.274521 | 1.865312 | 3.01E-01 | SRFBP1 |
| 7987449 | 4.33E-04 | 4.02E-05 | 4.273585 | 1.861933 | 3.40E-01 | SRP14 |
| 8100994 | 4.36E-04 | 4.06E-05 | -4.271497 | 1.854397 | -4.48E-01 | CXCL2 |
| 8010271 | 4.42E-04 | 4.12E-05 | -4.267523 | 1.840063 | -3.33E-01 | PGS1 |
| 8150872 | 4.49E-04 | 4.20E-05 | 4.262379 | 1.82152 | 4.62E-01 | RPS20 |
| 7974542 | 4.50E-04 | 4.21E-05 | -4.261742 | 1.819224 | -3.53E-01 | TMEM260 |
| 8111101 | 4.50E-04 | 4.21E-05 | 4.261619 | 1.818779 | 4.32E-01 | ANKH |
| 8116070 | 4.51E-04 | 4.23E-05 | -4.260451 | 1.814573 | -3.44E-01 | PDLIM7 |
| 7983910 | 4.54E-04 | 4.28E-05 | -4.257786 | 1.804975 | -8.17E-01 | AQP9 |
| 8014316 | 4.58E-04 | 4.33E-05 | 4.254776 | 1.79414 | 5.62E-01 | CCL5 |
| 7996313 | 4.59E-04 | 4.34E-05 | -4.253821 | 1.790705 | -4.88E-01 | CMTM2 |
| 8137483 | 4.60E-04 | 4.35E-05 | -4.253433 | 1.789309 | -3.35E-01 | FLJ16734 |
| 8092596 | 4.61E-04 | 4.36E-05 | -4.252615 | 1.786368 | -3.68E-01 | DGKG |
| 8096771 | 4.64E-04 | 4.40E-05 | 4.250122 | 1.777401 | 3.10E-01 | OSTC |
| 8064464 | 4.66E-04 | 4.43E-05 | -4.248844 | 1.772805 | -4.18E-01 | SIRPD |
| 8114030 | 4.66E-04 | 4.43E-05 | 4.248401 | 1.771215 | 3.35E-01 | KIF3A |
| 8111698 | 4.69E-04 | 4.47E-05 | -4.24655 | 1.764562 | -4.03E-01 | RICTOR |
| 8120992 | 4.71E-04 | 4.49E-05 | -4.245286 | 1.760017 | -4.38E-01 | ZNF292 |
| 8054997 | 4.72E-04 | 4.50E-05 | -4.244603 | 1.757564 | -3.19E-01 | MAP3K2 |
| 8020411 | 4.72E-04 | 4.51E-05 | 4.244178 | 1.756038 | 3.58E-01 | SNRPD1 |
| 8081241 | 4.80E-04 | 4.59E-05 | 4.239102 | 1.737814 | 3.27E-01 | CMSS1 |
| 8029107 | 4.87E-04 | 4.68E-05 | -4.234535 | 1.721427 | -5.10E-01 | CEACAM3 |
| 8162880 | 4.88E-04 | 4.69E-05 | 4.233505 | 1.717736 | 3.16E-01 | MRPL50 |
| 8051882 | 4.94E-04 | 4.77E-05 | 4.229501 | 1.703382 | 3.01E-01 | LRPPRC |
| 7978595 | 4.95E-04 | 4.78E-05 | -4.229015 | 1.701641 | -3.37E-01 | BAZ1A |
| 7914950 | 5.07E-04 | 4.91E-05 | -4.221731 | 1.67556 | -4.97E-01 | CSF3R |
| 8083757 | 5.07E-04 | 4.91E-05 | 4.221575 | 1.675003 | 3.24E-01 | NMD3 |
| 8121009 | 5.07E-04 | 4.92E-05 | -4.221385 | 1.674324 | -3.85E-01 | C6orf163 |
| 7914603 | 5.07E-04 | 4.92E-05 | -4.22119 | 1.673625 | -3.22E-01 | RNF19B |
| 7921298 | 5.09E-04 | 4.95E-05 | -4.219901 | 1.669013 | -5.64E-01 | FCRL2 |
| 7938390 | 5.14E-04 | 5.01E-05 | -4.216537 | 1.656981 | -7.43E-01 | ADM |
| 8078605 | 5.14E-04 | 5.02E-05 | -4.216215 | 1.655833 | -3.20E-01 | C3orf35 |
| 8053036 | 5.14E-04 | 5.02E-05 | 4.216206 | 1.655798 | 3.87E-01 | TPRKB |
| 8066939 | 5.16E-04 | 5.04E-05 | -4.21516 | 1.65206 | -6.19E-01 | B4GALT5 |
| 8080878 | 5.17E-04 | 5.05E-05 | -4.21468 | 1.650343 | -3.25E-01 | ATXN7 |
| 8155930 | 5.20E-04 | 5.08E-05 | -4.213025 | 1.644432 | -3.47E-01 | GCNT1 |
| 7953211 | 5.23E-04 | 5.12E-05 | 4.210855 | 1.63668 | 3.25E-01 | TIGAR |
| 8168691 | 5.28E-04 | 5.17E-05 | -4.208335 | 1.627679 | -4.32E-01 | DIAPH2 |
| 8140319 | 5.29E-04 | 5.19E-05 | -4.207404 | 1.624355 | -5.29E-01 | HIP1 |
| 8109283 | 5.34E-04 | 5.24E-05 | -4.205027 | 1.615873 | -3.63E-01 | NDST1 |
| 8133155 | 5.40E-04 | 5.30E-05 | -4.201617 | 1.60371 | -5.21E-01 | TPST1 |
| 8153449 | 5.43E-04 | 5.34E-05 | 4.199795 | 1.597213 | 3.08E-01 | EEF1D |
| 7995096 | 5.44E-04 | 5.35E-05 | -4.199295 | 1.595428 | -4.03E-01 | ITGAM |
| 8054192 | 5.45E-04 | 5.37E-05 | 4.198384 | 1.592183 | 3.51E-01 | MITD1 |
| 8090364 | 5.46E-04 | 5.38E-05 | -4.198012 | 1.590858 | -3.62E-01 | ZXDC |
| 7919314 | 5.49E-04 | 5.43E-05 | 4.195566 | 1.58214 | 3.62E-01 | FMO5 |
| 8047815 | 5.56E-04 | 5.50E-05 | 4.19198 | 1.569372 | 3.20E-01 | FASTKD2 |
| 8026300 | 5.60E-04 | 5.55E-05 | -4.189634 | 1.56102 | -3.10E-01 | ADGRE5 |
| 8056693 | 5.64E-04 | 5.62E-05 | 4.186623 | 1.550308 | 3.22E-01 | FASTKD1 |
| 8012304 | 5.66E-04 | 5.64E-05 | 4.185734 | 1.547146 | 3.18E-01 | TRAPPC1 |
| 8018189 | 5.67E-04 | 5.66E-05 | 4.184764 | 1.543696 | 3.58E-01 | CD300E |
| 8017344 | 5.68E-04 | 5.66E-05 | -4.184402 | 1.542411 | -5.50E-01 | LOC100129112 |
| 7913655 | 5.71E-04 | 5.71E-05 | 4.182397 | 1.535282 | 4.12E-01 | ID3 |
| 7918457 | 5.77E-04 | 5.79E-05 | 4.178706 | 1.522168 | 4.22E-01 | KCNA3 |
| 8135514 | 5.79E-04 | 5.82E-05 | -4.177379 | 1.517453 | -3.70E-01 | IFRD1 |
| 8050763 | 5.90E-04 | 5.95E-05 | 4.171651 | 1.497123 | 3.64E-01 | PTRHD1 |
| 8128429 | 5.96E-04 | 6.02E-05 | 4.168189 | 1.484847 | 3.46E-01 | CCNC |
| 8042637 | 6.02E-04 | 6.09E-05 | -4.165169 | 1.474142 | -6.55E-01 | DYSF |
| 7985089 | 6.10E-04 | 6.20E-05 | 4.160471 | 1.457501 | 3.46E-01 | RCN2 |
| 8058182 | 6.13E-04 | 6.25E-05 | -4.158601 | 1.450879 | -3.84E-01 | FAM126B |
| 7933723 | 6.16E-04 | 6.31E-05 | -4.156152 | 1.442213 | -3.57E-01 | IPMK |
| 8016847 | 6.18E-04 | 6.33E-05 | -4.155068 | 1.438377 | -3.41E-01 | TRIM25 |
| 8092265 | 6.22E-04 | 6.40E-05 | 4.152424 | 1.429026 | 3.21E-01 | MRPL47 |
| 8143534 | 6.29E-04 | 6.48E-05 | -4.149067 | 1.417162 | -5.80E-01 | KEL |
| 8180344 | 6.30E-04 | 6.50E-05 | -4.148362 | 1.41467 | -3.02E-01 | GNAQ |
| 8116734 | 6.37E-04 | 6.58E-05 | 4.144975 | 1.402709 | 4.39E-01 | LY86 |
| 8065032 | 6.37E-04 | 6.58E-05 | 4.144876 | 1.402357 | 3.50E-01 | ESF1 |
| 8141295 | 6.37E-04 | 6.59E-05 | 4.144647 | 1.40155 | 3.35E-01 | ATP5J2 |
| 8162147 | 6.47E-04 | 6.72E-05 | -4.139583 | 1.383676 | -3.52E-01 | ZCCHC6 |
| 8020898 | 6.48E-04 | 6.73E-05 | 4.139111 | 1.382012 | 3.29E-01 | ZNF271P |
| 8069933 | 6.50E-04 | 6.76E-05 | 4.137733 | 1.37715 | 3.63E-01 | MIS18A |
| 8121632 | 6.58E-04 | 6.86E-05 | 4.13383 | 1.363393 | 4.14E-01 | KPNA5 |
| 8044804 | 6.61E-04 | 6.91E-05 | 4.132164 | 1.357524 | 3.15E-01 | DBI |
| 8045514 | 6.78E-04 | 7.15E-05 | -4.123032 | 1.325374 | -3.27E-01 | SPOPL |
| 8165911 | 6.80E-04 | 7.17E-05 | -4.122244 | 1.322604 | -3.05E-01 | TBL1X |
| 8162086 | 6.84E-04 | 7.22E-05 | -4.120274 | 1.315675 | -3.47E-01 | AGTPBP1 |
| 8017619 | 6.91E-04 | 7.32E-05 | -4.116904 | 1.303833 | -4.90E-01 | PECAM1 |
| 7973352 | 6.94E-04 | 7.35E-05 | -4.115732 | 1.299715 | -3.61E-01 | LRP10 |
| 8019357 | 7.01E-04 | 7.44E-05 | 4.11234 | 1.287801 | 3.10E-01 | DCXR |
| 8091737 | 7.02E-04 | 7.46E-05 | 4.111753 | 1.285742 | 4.31E-01 | IFT80 |
| 7938396 | 7.05E-04 | 7.50E-05 | -4.110322 | 1.280719 | -3.23E-01 | AMPD3 |
| 7973900 | 7.05E-04 | 7.50E-05 | 4.11024 | 1.280431 | 3.82E-01 | IGBP1P1 |
| 8071036 | 7.08E-04 | 7.55E-05 | 4.108528 | 1.274426 | 5.59E-01 | S100B |
| 7942381 | 7.08E-04 | 7.57E-05 | -4.107762 | 1.271737 | -3.68E-01 | ATG16L2 |
| 7924817 | 7.10E-04 | 7.61E-05 | -4.106604 | 1.267674 | -3.61E-01 | PRO2012 |
| 8153262 | 7.19E-04 | 7.72E-05 | -4.102608 | 1.253666 | -3.66E-01 | SLC45A4 |
| 7988644 | 7.26E-04 | 7.82E-05 | -4.099164 | 1.241598 | -6.48E-01 | ATP8B4 |
| 8003056 | 7.30E-04 | 7.87E-05 | -4.097668 | 1.236361 | -3.19E-01 | GAFA2 |
| 7939120 | 7.30E-04 | 7.87E-05 | 4.097364 | 1.235296 | 3.33E-01 | RCN1 |
| 8043861 | 7.36E-04 | 7.95E-05 | 4.0947 | 1.225971 | 3.10E-01 | EIF5B |
| 8065433 | 7.40E-04 | 8.01E-05 | -4.092912 | 1.219713 | -5.70E-01 | APMAP |
| 7969651 | 7.44E-04 | 8.05E-05 | -4.091474 | 1.214685 | -3.15E-01 | DNAJC3 |
| 8117888 | 7.48E-04 | 8.10E-05 | 4.089816 | 1.208886 | 3.09E-01 | RAN |
| 8179055 | 7.48E-04 | 8.11E-05 | 4.089602 | 1.208137 | 3.37E-01 | ZNRD1 |
| 7990636 | 7.60E-04 | 8.25E-05 | -4.08493 | 1.191808 | -6.02E-01 | LINC00597 |
| 7957649 | 7.63E-04 | 8.30E-05 | 4.083399 | 1.18646 | 3.24E-01 | SNRPF |
| 7961654 | 7.64E-04 | 8.31E-05 | 4.083026 | 1.185159 | 3.30E-01 | RECQL |
| 8056060 | 7.65E-04 | 8.33E-05 | -4.082373 | 1.182878 | -4.54E-01 | BAZ2B |
| 8004691 | 7.69E-04 | 8.38E-05 | -4.080781 | 1.177318 | -3.58E-01 | TMEM88 |
| 8051298 | 7.73E-04 | 8.44E-05 | -4.078977 | 1.171021 | -4.29E-01 | GALNT14 |
| 8005471 | 7.73E-04 | 8.44E-05 | 4.078876 | 1.170671 | 4.49E-01 | RPS28 |
| 8058905 | 7.75E-04 | 8.47E-05 | -4.077848 | 1.167084 | -9.06E-01 | CXCR1 |
| 8036324 | 7.92E-04 | 8.70E-05 | 4.070913 | 1.142902 | 3.30E-01 | ZNF260 |
| 7968556 | 7.99E-04 | 8.82E-05 | -4.067127 | 1.129715 | -3.83E-01 | KL |
| 8081386 | 8.06E-04 | 8.90E-05 | -4.064851 | 1.121791 | -3.96E-01 | NFKBIZ |
| 8144557 | 8.08E-04 | 8.93E-05 | -4.063927 | 1.118573 | -3.29E-01 | MSRA |
| 8017704 | 8.08E-04 | 8.94E-05 | 4.063596 | 1.117421 | 3.18E-01 | AMZ2P1 |
| 8116859 | 8.11E-04 | 8.98E-05 | 4.06226 | 1.112771 | 3.57E-01 | TMEM14C |
| 7923917 | 8.13E-04 | 9.02E-05 | 4.061261 | 1.109297 | 4.49E-01 | FCMR |
| 8034304 | 8.16E-04 | 9.06E-05 | 4.059955 | 1.104756 | 3.31E-01 | ACP5 |
| 8060061 | 8.17E-04 | 9.07E-05 | -4.059681 | 1.103804 | -4.28E-01 | MGC16025 |
| 8090630 | 8.19E-04 | 9.11E-05 | -4.058586 | 1.099996 | -3.19E-01 | TMCC1 |
| 7974146 | 8.30E-04 | 9.25E-05 | 4.054511 | 1.08583 | 3.47E-01 | PRPF39 |
| 7975459 | 8.30E-04 | 9.25E-05 | -4.054453 | 1.085631 | -3.42E-01 | SIPA1L1 |
| 7962590 | 8.31E-04 | 9.27E-05 | 4.053822 | 1.083437 | 3.14E-01 | RPAP3 |
| 8041048 | 8.39E-04 | 9.39E-05 | -4.050398 | 1.071547 | -3.40E-01 | FOSL2 |
| 8121257 | 8.39E-04 | 9.40E-05 | -4.050021 | 1.07024 | -4.09E-01 | PRDM1 |
| 7979698 | 8.39E-04 | 9.41E-05 | 4.049899 | 1.069816 | 3.47E-01 | ATP6V1D |
| 8150491 | 8.47E-04 | 9.51E-05 | -4.047045 | 1.059911 | -3.43E-01 | KAT6A |
| 7930577 | 8.47E-04 | 9.51E-05 | 4.04684 | 1.0592 | 3.21E-01 | CASP7 |
| 8135224 | 8.74E-04 | 9.86E-05 | -4.037169 | 1.025675 | -3.02E-01 | NFE4 |
| 8107133 | 8.77E-04 | 9.91E-05 | -4.035989 | 1.02159 | -3.54E-01 | PAM |
| 8171848 | 8.78E-04 | 9.92E-05 | 4.035728 | 1.020686 | 4.35E-01 | PCYT1B |
| 8148978 | 8.81E-04 | 9.97E-05 | -4.034339 | 1.015879 | -3.15E-01 | ERICH1 |
| 8092067 | 8.84E-04 | 1.00E-04 | 4.033264 | 1.012155 | 4.27E-01 | RPL22L1 |
| 8119102 | 8.89E-04 | 1.01E-04 | -4.031319 | 1.005426 | -3.39E-01 | RAB44 |
| 8054092 | 8.93E-04 | 1.02E-04 | -4.029393 | 0.998764 | -3.29E-01 | TMEM131 |
| 8112476 | 8.96E-04 | 1.02E-04 | -4.028252 | 0.994819 | -5.38E-01 | LOC441081 |
| 8017850 | 8.97E-04 | 1.02E-04 | -4.028031 | 0.994054 | -4.30E-01 | WIPI1 |
| 8031374 | 9.00E-04 | 1.02E-04 | -4.026859 | 0.990002 | -5.40E-01 | FCAR |
| 8157727 | 9.07E-04 | 1.04E-04 | -4.024039 | 0.980258 | -6.30E-01 | GPR21 |
| 7964250 | 9.13E-04 | 1.04E-04 | 4.022156 | 0.973755 | 3.19E-01 | PTGES3 |
| 7956949 | 9.16E-04 | 1.05E-04 | 4.020664 | 0.968599 | 3.03E-01 | NUP107 |
| 8091327 | 9.25E-04 | 1.06E-04 | -4.017876 | 0.958978 | -5.33E-01 | PLSCR1 |
| 8085062 | 9.28E-04 | 1.06E-04 | -4.016616 | 0.954628 | -5.17E-01 | IL5RA |
| 8129649 | 9.32E-04 | 1.07E-04 | 4.015167 | 0.94963 | 4.46E-01 | SLC18B1 |
| 7918634 | 9.43E-04 | 1.09E-04 | -4.011211 | 0.935989 | -3.36E-01 | PHTF1 |
| 8087374 | 9.55E-04 | 1.10E-04 | -4.006814 | 0.92084 | -3.32E-01 | C3orf62 |
| 8080621 | 9.58E-04 | 1.11E-04 | 4.005748 | 0.917169 | 3.17E-01 | CCDC66 |
| 7980535 | 9.67E-04 | 1.12E-04 | 4.002421 | 0.905718 | 3.47E-01 | DYNLL1 |
| 8113050 | 9.74E-04 | 1.13E-04 | 3.999717 | 0.896417 | 3.84E-01 | CETN3 |
| 8130641 | 9.79E-04 | 1.14E-04 | -3.998053 | 0.890693 | -3.36E-01 | AGPAT4-IT1 |
| 8153474 | 9.81E-04 | 1.14E-04 | 3.997139 | 0.887553 | 3.47E-01 | TSTA3 |
| 7899160 | 9.86E-04 | 1.15E-04 | 3.995352 | 0.88141 | 3.94E-01 | CD52 |
| 8135734 | 9.92E-04 | 1.16E-04 | 3.99343 | 0.874806 | 4.66E-01 | CPED1 |
| 7961083 | 9.99E-04 | 1.17E-04 | 3.990716 | 0.865485 | 4.10E-01 | CLEC2B |
| 7980720 | 1.01E-03 | 1.18E-04 | -3.988229 | 0.856945 | -4.10E-01 | TTC7B |
| 8060418 | 1.01E-03 | 1.19E-04 | -3.987489 | 0.854408 | -3.28E-01 | SIRPA |
| 8096296 | 1.01E-03 | 1.19E-04 | 3.98741 | 0.854138 | 3.88E-01 | HSP90AB3P |
| 8006123 | 1.01E-03 | 1.19E-04 | -3.986704 | 0.851713 | -3.82E-01 | CPD |
| 8031398 | 1.01E-03 | 1.19E-04 | 3.985733 | 0.848382 | 4.02E-01 | NLRP2 |
| 7959834 | 1.01E-03 | 1.19E-04 | -3.985695 | 0.848253 | -5.09E-01 | GLT1D1 |
| 8046201 | 1.02E-03 | 1.20E-04 | 3.983443 | 0.840528 | 3.44E-01 | SSB |
| 8063115 | 1.03E-03 | 1.22E-04 | -3.979623 | 0.827434 | -1.1 | MMP9 |
| 8097586 | 1.03E-03 | 1.22E-04 | -3.979005 | 0.82532 | -3.89E-01 | GAB1 |
| 7945204 | 1.04E-03 | 1.23E-04 | -3.97718 | 0.819067 | -3.35E-01 | ST14 |
| 8084206 | 1.05E-03 | 1.25E-04 | -3.972415 | 0.802756 | -5.23E-01 | B3GNT5 |
| 7974920 | 1.06E-03 | 1.27E-04 | -3.968952 | 0.790909 | -6.07E-01 | SYNE2 |
| 7988921 | 1.07E-03 | 1.28E-04 | -3.96721 | 0.784953 | -3.24E-01 | MYO5A |
| 7904967 | 1.07E-03 | 1.28E-04 | -3.966347 | 0.782003 | -4.73E-01 | RNVU1-19 |
| 8028206 | 1.08E-03 | 1.29E-04 | 3.965033 | 0.777512 | 3.52E-01 | ZNF345 |
| 7962151 | 1.09E-03 | 1.31E-04 | -3.96033 | 0.761448 | -3.97E-01 | DENND5B |
| 7968344 | 1.09E-03 | 1.31E-04 | -3.960296 | 0.761332 | -5.62E-01 | ALOX5AP |
| 7979085 | 1.10E-03 | 1.32E-04 | -3.958398 | 0.754853 | -4.48E-01 | PYGL |
| 8160308 | 1.10E-03 | 1.32E-04 | 3.958299 | 0.754515 | 3.54E-01 | RPS6 |
| 8045688 | 1.10E-03 | 1.32E-04 | -3.958236 | 0.7543 | -1.05 | TNFAIP6 |
| 7903393 | 1.10E-03 | 1.32E-04 | 3.957385 | 0.751398 | 3.37E-01 | S1PR1 |
| 8109830 | 1.10E-03 | 1.33E-04 | 3.956615 | 0.748769 | 3.19E-01 | SPDL1 |
| 7964830 | 1.11E-03 | 1.34E-04 | -3.954305 | 0.740891 | -3.72E-01 | SNORA70G |
| 8055639 | 1.11E-03 | 1.34E-04 | -3.953301 | 0.73747 | -8.56E-01 | ZEB2 |
| 8052524 | 1.11E-03 | 1.35E-04 | -3.953046 | 0.736598 | -4.86E-01 | SNORA70B |
| 7927146 | 1.11E-03 | 1.35E-04 | -3.952429 | 0.734495 | -3.06E-01 | CSGALNACT2 |
| 8055426 | 1.12E-03 | 1.36E-04 | 3.950422 | 0.727655 | 3.84E-01 | MCM6 |
| 8142431 | 1.14E-03 | 1.39E-04 | 3.944131 | 0.706232 | 3.29E-01 | LINC00998 |
| 8142345 | 1.14E-03 | 1.40E-04 | -3.943179 | 0.70299 | -5.57E-01 | DOCK4 |
| 8134211 | 1.15E-03 | 1.40E-04 | 3.941664 | 0.697835 | 3.18E-01 | RBM48 |
| 7946812 | 1.15E-03 | 1.41E-04 | 3.94037 | 0.693434 | 5.23E-01 | RPS13 |
| 8075316 | 1.15E-03 | 1.41E-04 | -3.939789 | 0.69146 | -5.07E-01 | OSM |
| 8027390 | 1.16E-03 | 1.42E-04 | 3.937728 | 0.684453 | 3.03E-01 | POP4 |
| 8073088 | 1.17E-03 | 1.44E-04 | 3.935326 | 0.676289 | 4.12E-01 | APOBEC3G |
| 7995128 | 1.17E-03 | 1.44E-04 | -3.933906 | 0.671464 | -3.95E-01 | ITGAX |
| 8081945 | 1.18E-03 | 1.46E-04 | 3.93026 | 0.659082 | 3.02E-01 | NDUFB4 |
| 8067055 | 1.19E-03 | 1.47E-04 | -3.929122 | 0.655222 | -6.22E-01 | ATP9A |
| 8028652 | 1.19E-03 | 1.47E-04 | -3.928972 | 0.65471 | -3.93E-01 | ZFP36 |
| 8086961 | 1.19E-03 | 1.48E-04 | -3.927811 | 0.650772 | -3.73E-01 | PFKFB4 |
| 8153175 | 1.19E-03 | 1.48E-04 | -3.927513 | 0.64976 | -3.00E-01 | TRAPPC9 |
| 8049297 | 1.20E-03 | 1.50E-04 | 3.923367 | 0.635701 | 4.88E-01 | SCARNA5 |
| 8035847 | 1.21E-03 | 1.52E-04 | 3.920325 | 0.625391 | 3.82E-01 | ZNF675 |
| 8042495 | 1.23E-03 | 1.54E-04 | 3.915757 | 0.609924 | 3.07E-01 | SNRNP27 |
| 8113938 | 1.24E-03 | 1.55E-04 | 3.913779 | 0.603229 | 3.57E-01 | ACSL6 |
| 7903092 | 1.25E-03 | 1.57E-04 | -3.911626 | 0.595943 | -4.79E-01 | FNBP1L |
| 8165309 | 1.25E-03 | 1.57E-04 | 3.911028 | 0.59392 | 3.16E-01 | EDF1 |
| 8083850 | 1.26E-03 | 1.58E-04 | -3.908602 | 0.585721 | -3.80E-01 | PHC3 |
| 8026047 | 1.26E-03 | 1.59E-04 | -3.907009 | 0.580335 | -4.13E-01 | JUNB |
| 8146544 | 1.27E-03 | 1.60E-04 | -3.905923 | 0.576664 | -3.68E-01 | UBXN2B |
| 7974418 | 1.27E-03 | 1.60E-04 | 3.905598 | 0.575569 | 3.01E-01 | CGRRF1 |
| 7934729 | 1.27E-03 | 1.60E-04 | 3.905547 | 0.575396 | 3.82E-01 | C1D |
| 8098762 | 1.27E-03 | 1.61E-04 | 3.903853 | 0.569674 | 3.13E-01 | ATP5I |
| 8152215 | 1.28E-03 | 1.63E-04 | -3.901395 | 0.561374 | -3.49E-01 | KLF10 |
| 8174379 | 1.29E-03 | 1.64E-04 | 3.899608 | 0.555342 | 3.08E-01 | PSMD10 |
| 8081799 | 1.29E-03 | 1.64E-04 | 3.899392 | 0.554615 | 3.34E-01 | TIGIT |
| 7905299 | 1.29E-03 | 1.65E-04 | 3.897938 | 0.549708 | 3.24E-01 | PRUNE1 |
| 7996954 | 1.32E-03 | 1.68E-04 | -3.891741 | 0.528817 | -4.18E-01 | NFAT5 |
| 8164596 | 1.32E-03 | 1.69E-04 | 3.891026 | 0.526407 | 3.46E-01 | C9orf78 |
| 8180256 | 1.32E-03 | 1.69E-04 | 3.89101 | 0.526355 | 3.20E-01 | FAM60A |
| 8081853 | 1.32E-03 | 1.69E-04 | 3.890734 | 0.525424 | 3.06E-01 | POGLUT1 |
| 8023175 | 1.33E-03 | 1.72E-04 | 3.886417 | 0.510886 | 3.04E-01 | IER3IP1 |
| 7908968 | 1.34E-03 | 1.72E-04 | 3.885337 | 0.507252 | 3.26E-01 | LAX1 |
| 8113130 | 1.36E-03 | 1.76E-04 | -3.88003 | 0.489405 | -3.39E-01 | MCTP1 |
| 8095680 | 1.38E-03 | 1.79E-04 | -3.874764 | 0.471709 | -9.54E-01 | CXCL8 |
| 8034694 | 1.38E-03 | 1.79E-04 | -3.874234 | 0.46993 | -4.85E-01 | MIR24-2 |
| 8048227 | 1.38E-03 | 1.80E-04 | -3.874122 | 0.469554 | -7.31E-01 | CXCR2 |
| 8046003 | 1.38E-03 | 1.80E-04 | -3.873914 | 0.468854 | -4.84E-01 | GCA |
| 8022711 | 1.39E-03 | 1.81E-04 | -3.871843 | 0.461903 | -4.41E-01 | DSC2 |
| 8134435 | 1.40E-03 | 1.83E-04 | -3.869271 | 0.453274 | -3.12E-01 | LMTK2 |
| 8028194 | 1.40E-03 | 1.83E-04 | 3.868729 | 0.451456 | 3.47E-01 | ZNF382 |
| 7975676 | 1.40E-03 | 1.83E-04 | 3.868682 | 0.451299 | 3.22E-01 | BBOF1 |
| 7960381 | 1.40E-03 | 1.84E-04 | -3.867929 | 0.448771 | -3.56E-01 | CRACR2A |
| 7901993 | 1.41E-03 | 1.84E-04 | 3.867437 | 0.447125 | 3.64E-01 | CACHD1 |
| 7999841 | 1.43E-03 | 1.88E-04 | -3.862015 | 0.428952 | -4.29E-01 | SMG1 |
| 8151711 | 1.44E-03 | 1.89E-04 | -3.859403 | 0.420204 | -3.87E-01 | NBN |
| 7952036 | 1.44E-03 | 1.89E-04 | -3.859388 | 0.420154 | -3.62E-01 | MPZL3 |
| 8150988 | 1.44E-03 | 1.90E-04 | -3.857829 | 0.414935 | -5.05E-01 | ASPH |
| 8024194 | 1.45E-03 | 1.91E-04 | 3.856939 | 0.411957 | 3.35E-01 | GPX4 |
| 7943314 | 1.45E-03 | 1.91E-04 | 3.856867 | 0.411717 | 3.04E-01 | JRKL |
| 7988789 | 1.45E-03 | 1.92E-04 | -3.855826 | 0.408232 | -4.33E-01 | DMXL2 |
| 8019563 | 1.45E-03 | 1.92E-04 | 3.855461 | 0.407011 | 3.26E-01 | MGC70870 |
| 8068583 | 1.45E-03 | 1.92E-04 | -3.85516 | 0.406006 | -8.11E-01 | KCNJ15 |
| 8018288 | 1.47E-03 | 1.95E-04 | 3.8516 | 0.394101 | 3.00E-01 | ATP5H |
| 8110166 | 1.48E-03 | 1.96E-04 | 3.84982 | 0.38815 | 3.61E-01 | HIGD2A |
| 7922343 | 1.48E-03 | 1.96E-04 | 3.849228 | 0.386174 | 5.66E-01 | TNFSF4 |
| 8057578 | 1.50E-03 | 2.00E-04 | 3.844819 | 0.371447 | 3.93E-01 | CALCRL |
| 7898693 | 1.51E-03 | 2.01E-04 | -3.843111 | 0.365745 | -1.08 | ALPL |
| 8140730 | 1.51E-03 | 2.01E-04 | 3.842766 | 0.364594 | 3.05E-01 | TMEM243 |
| 8144228 | 1.51E-03 | 2.02E-04 | -3.84152 | 0.360438 | -3.34E-01 | FLJ36840 |
| 8169617 | 1.52E-03 | 2.03E-04 | 3.840418 | 0.356761 | 4.81E-01 | PGRMC1 |
| 8166184 | 1.52E-03 | 2.04E-04 | 3.839376 | 0.353284 | 3.00E-01 | CA5B |
| 7975292 | 1.53E-03 | 2.05E-04 | -3.837325 | 0.346449 | -3.45E-01 | RAD51B |
| 8118322 | 1.55E-03 | 2.08E-04 | 3.833281 | 0.332974 | 3.61E-01 | SNORD52 |
| 7957759 | 1.57E-03 | 2.11E-04 | -3.829068 | 0.318947 | -3.07E-01 | APAF1 |
| 8073194 | 1.57E-03 | 2.12E-04 | 3.82762 | 0.314127 | 4.40E-01 | GRAP2 |
| 7929511 | 1.58E-03 | 2.14E-04 | -3.825041 | 0.305551 | -3.04E-01 | ENTPD1 |
| 7949637 | 1.58E-03 | 2.14E-04 | 3.824969 | 0.305313 | 3.05E-01 | MRPL11 |
| 7965156 | 1.61E-03 | 2.18E-04 | -3.820329 | 0.289889 | -5.77E-01 | LIN7A |
| 7926334 | 1.61E-03 | 2.19E-04 | -3.818656 | 0.284333 | -7.45E-01 | OLAH |
| 8135277 | 1.62E-03 | 2.21E-04 | -3.816446 | 0.276995 | -3.28E-01 | KMT2E |
| 7935188 | 1.63E-03 | 2.21E-04 | -3.815964 | 0.275396 | -3.58E-01 | SORBS1 |
| 8157021 | 1.63E-03 | 2.23E-04 | 3.814305 | 0.26989 | 3.70E-01 | NIPSNAP3A |
| 7977075 | 1.63E-03 | 2.23E-04 | -3.814061 | 0.26908 | -5.08E-01 | SNORA28 |
| 8115871 | 1.64E-03 | 2.23E-04 | -3.813382 | 0.266826 | -3.83E-01 | FLJ16171 |
| 8125959 | 1.64E-03 | 2.24E-04 | -3.812643 | 0.264376 | -5.79E-01 | SLC26A8 |
| 8124134 | 1.64E-03 | 2.24E-04 | 3.812454 | 0.263747 | 3.15E-01 | TPMT |
| 7931930 | 1.64E-03 | 2.25E-04 | 3.811599 | 0.260914 | 3.43E-01 | PRKCQ |
| 8078014 | 1.64E-03 | 2.25E-04 | -3.81152 | 0.260652 | -3.23E-01 | SLC6A6 |
| 8154178 | 1.68E-03 | 2.32E-04 | -3.803121 | 0.23282 | -3.22E-01 | JAK2 |
| 8086222 | 1.68E-03 | 2.33E-04 | -3.802233 | 0.229881 | -3.02E-01 | SCN5A |
| 7924733 | 1.69E-03 | 2.33E-04 | 3.801781 | 0.228387 | 3.00E-01 | PARP1 |
| 8018975 | 1.69E-03 | 2.33E-04 | 3.801624 | 0.227868 | 3.64E-01 | LGALS3BP |
| 8069399 | 1.69E-03 | 2.34E-04 | -3.800253 | 0.223329 | -3.33E-01 | DIP2A |
| 8147891 | 1.70E-03 | 2.35E-04 | -3.799076 | 0.219436 | -7.00E-01 | PKHD1L1 |
| 7983940 | 1.72E-03 | 2.40E-04 | -3.79328 | 0.200274 | -3.27E-01 | FAM63B |
| 7941444 | 1.74E-03 | 2.42E-04 | 3.791025 | 0.192824 | 4.21E-01 | CTSW |
| 8014248 | 1.74E-03 | 2.43E-04 | -3.79016 | 0.189969 | -4.08E-01 | SLFN13 |
| 7971661 | 1.74E-03 | 2.43E-04 | -3.790021 | 0.189512 | -4.35E-01 | MIR15A |
| 8151967 | 1.74E-03 | 2.44E-04 | -3.789226 | 0.186887 | -3.28E-01 | STK3 |
| 7968484 | 1.75E-03 | 2.45E-04 | -3.787891 | 0.182478 | -4.17E-01 | BRCA2 |
| 8108847 | 1.76E-03 | 2.45E-04 | 3.787228 | 0.180292 | 3.18E-01 | RNF14 |
| 8061668 | 1.76E-03 | 2.46E-04 | -3.786624 | 0.178298 | -3.07E-01 | HCK |
| 8025278 | 1.76E-03 | 2.47E-04 | -3.785438 | 0.174384 | -6.82E-01 | RETN |
| 8123893 | 1.77E-03 | 2.49E-04 | -3.783527 | 0.168082 | -5.76E-01 | MAK |
| 8080980 | 1.78E-03 | 2.50E-04 | -3.781687 | 0.162015 | -3.55E-01 | EBLN2 |
| 8086538 | 1.79E-03 | 2.52E-04 | -3.780098 | 0.156779 | -6.21E-01 | LIMD1-AS1 |
| 8131996 | 1.79E-03 | 2.52E-04 | -3.779237 | 0.153942 | -4.53E-01 | CREB5 |
| 8151512 | 1.82E-03 | 2.57E-04 | -3.774729 | 0.139095 | -3.05E-01 | PAG1 |
| 7971486 | 1.82E-03 | 2.58E-04 | -3.773319 | 0.134458 | -3.66E-01 | KIAA0226L |
| 8006845 | 1.83E-03 | 2.58E-04 | 3.772739 | 0.132548 | 3.59E-01 | RPL19 |
| 8168359 | 1.84E-03 | 2.62E-04 | -3.769022 | 0.120324 | -3.43E-01 | NHSL2 |
| 8160213 | 1.85E-03 | 2.64E-04 | 3.767054 | 0.113852 | 3.89E-01 | TTC39B |
| 8116835 | 1.85E-03 | 2.64E-04 | -3.766932 | 0.113451 | -3.36E-01 | GCNT2 |
| 8093494 | 1.89E-03 | 2.71E-04 | -3.759605 | 0.089393 | -4.60E-01 | CRIPAK |
| 8126512 | 1.90E-03 | 2.72E-04 | 3.758725 | 0.086506 | 3.03E-01 | MRPL2 |
| 7965022 | 1.90E-03 | 2.73E-04 | 3.757235 | 0.081618 | 3.01E-01 | KRR1 |
| 7903188 | 1.91E-03 | 2.74E-04 | -3.755964 | 0.077448 | -3.81E-01 | PTBP2 |
| 7951397 | 1.92E-03 | 2.75E-04 | 3.755062 | 0.074491 | 3.22E-01 | CASP1 |
| 8037430 | 1.92E-03 | 2.76E-04 | 3.754623 | 0.073053 | 3.73E-01 | ZNF404 |
| 8105331 | 1.94E-03 | 2.78E-04 | 3.751738 | 0.063599 | 7.82E-01 | GZMK |
| 8092134 | 1.94E-03 | 2.80E-04 | -3.750136 | 0.05835 | -4.77E-01 | PLD1 |
| 7925525 | 1.95E-03 | 2.80E-04 | -3.749691 | 0.056893 | -3.94E-01 | CEP170 |
| 8043276 | 1.96E-03 | 2.82E-04 | 3.747741 | 0.050508 | 5.98E-01 | SNORD94 |
| 8033332 | 1.99E-03 | 2.89E-04 | -3.740754 | 0.027654 | -5.10E-01 | ADGRE4P |
| 8107330 | 2.00E-03 | 2.90E-04 | -3.740254 | 0.026019 | -3.29E-01 | APC |
| 8050115 | 2.01E-03 | 2.93E-04 | -3.737597 | 0.017339 | -4.05E-01 | LINC00299 |
| 8078008 | 2.02E-03 | 2.95E-04 | 3.735376 | 0.010084 | 4.25E-01 | LSM3 |
| 8121031 | 2.02E-03 | 2.95E-04 | 3.735366 | 0.010053 | 3.45E-01 | SLC35A1 |
| 8126135 | 2.03E-03 | 2.96E-04 | 3.734035 | 0.005708 | 3.00E-01 | GLO1 |
| 7922846 | 2.08E-03 | 3.05E-04 | -3.726136 | -0.020054 | -5.74E-01 | FAM129A |
| 7908861 | 2.10E-03 | 3.08E-04 | -3.722725 | -0.031168 | -8.24E-01 | OCR1 |
| 8139840 | 2.11E-03 | 3.10E-04 | -3.721149 | -0.036297 | -3.15E-01 | ERV3-1 |
| 8018184 | 2.13E-03 | 3.13E-04 | -3.718531 | -0.044818 | -3.84E-01 | CD300LD |
| 8017776 | 2.13E-03 | 3.14E-04 | -3.717913 | -0.046828 | -3.45E-01 | HELZ |
| 8091141 | 2.13E-03 | 3.14E-04 | -3.717703 | -0.047511 | -3.56E-01 | XRN1 |
| 8121825 | 2.19E-03 | 3.25E-04 | -3.707875 | -0.079451 | -4.10E-01 | RNF217 |
| 8100026 | 2.20E-03 | 3.26E-04 | -3.707288 | -0.081356 | -3.73E-01 | ATP8A1 |
| 8103684 | 2.21E-03 | 3.28E-04 | 3.705236 | -0.088014 | 3.11E-01 | HPF1 |
| 8084929 | 2.21E-03 | 3.30E-04 | -3.703718 | -0.092939 | -3.66E-01 | SLC51A |
| 8120860 | 2.21E-03 | 3.30E-04 | 3.703611 | -0.093285 | 3.08E-01 | BCKDHB |
| 8123407 | 2.24E-03 | 3.35E-04 | -3.699267 | -0.107371 | -4.07E-01 | AFDN |
| 7961230 | 2.25E-03 | 3.37E-04 | 3.697818 | -0.112063 | 3.40E-01 | YBX3 |
| 7979721 | 2.26E-03 | 3.37E-04 | 3.697216 | -0.114014 | 3.64E-01 | TMEM229B |
| 8180348 | 2.27E-03 | 3.39E-04 | 3.69582 | -0.118536 | 3.29E-01 | XCL1 |
| 7909011 | 2.30E-03 | 3.44E-04 | -3.691686 | -0.131914 | -3.17E-01 | MDM4 |
| 8112331 | 2.30E-03 | 3.44E-04 | 3.691344 | -0.133022 | 4.27E-01 | ISCA1 |
| 7971373 | 2.31E-03 | 3.46E-04 | -3.689793 | -0.138037 | -4.18E-01 | TPT1 |
| 8069880 | 2.37E-03 | 3.58E-04 | 3.680682 | -0.167477 | 3.30E-01 | TIAM1 |
| 8091354 | 2.37E-03 | 3.58E-04 | 3.680304 | -0.168696 | 3.05E-01 | HLTF |
| 7997593 | 2.38E-03 | 3.59E-04 | -3.679832 | -0.170219 | -5.33E-01 | ATP2C2 |
| 8135902 | 2.40E-03 | 3.63E-04 | -3.676199 | -0.181938 | -6.43E-01 | SND1-IT1 |
| 7937938 | 2.40E-03 | 3.64E-04 | -3.675459 | -0.184325 | -3.72E-01 | OR52K2 |
| 7981949 | 2.42E-03 | 3.68E-04 | 3.672752 | -0.193051 | 7.72E-01 | SNORD116-1 |
| 8113097 | 2.44E-03 | 3.70E-04 | -3.670905 | -0.199001 | -5.15E-01 | KIAA0825 |
| 8049299 | 2.49E-03 | 3.81E-04 | 3.662368 | -0.226475 | 5.72E-01 | SCARNA6 |
| 8115831 | 2.50E-03 | 3.83E-04 | -3.660887 | -0.231236 | -4.55E-01 | DUSP1 |
| 8027856 | 2.51E-03 | 3.84E-04 | -3.660481 | -0.232541 | -3.86E-01 | FFAR3 |
| 8049957 | 2.53E-03 | 3.88E-04 | -3.657498 | -0.242124 | -3.56E-01 | LOC285097 |
| 7961900 | 2.53E-03 | 3.88E-04 | -3.65702 | -0.24366 | -4.17E-01 | ITPR2 |
| 7921237 | 2.54E-03 | 3.89E-04 | -3.656279 | -0.246037 | -4.29E-01 | FCRL5 |
| 7906107 | 2.54E-03 | 3.90E-04 | -3.655577 | -0.248293 | -3.10E-01 | SEMA4A |
| 8024299 | 2.55E-03 | 3.92E-04 | 3.654635 | -0.251318 | 3.76E-01 | RPS15 |
| 8099967 | 2.55E-03 | 3.92E-04 | -3.654151 | -0.252871 | -3.90E-01 | RBM47 |
| 8106978 | 2.56E-03 | 3.95E-04 | 3.652258 | -0.258945 | 3.70E-01 | RFESD |
| 8113602 | 2.61E-03 | 4.04E-04 | 3.645981 | -0.27907 | 3.04E-01 | CCDC112 |
| 8112178 | 2.61E-03 | 4.05E-04 | -3.645003 | -0.282204 | -4.47E-01 | LOC100509780 |
| 8151756 | 2.62E-03 | 4.07E-04 | -3.643763 | -0.286173 | -3.66E-01 | TMEM55A |
| 8125941 | 2.62E-03 | 4.08E-04 | -3.64321 | -0.287944 | -3.36E-01 | SRPK1 |
| 8104492 | 2.63E-03 | 4.08E-04 | -3.642613 | -0.289858 | -5.59E-01 | ROPN1L |
| 7956401 | 2.68E-03 | 4.18E-04 | 3.635925 | -0.311252 | 3.30E-01 | SHMT2 |
| 7974603 | 2.71E-03 | 4.24E-04 | 3.631702 | -0.324749 | 3.35E-01 | PSMA3 |
| 7966517 | 2.71E-03 | 4.24E-04 | -3.631468 | -0.325495 | -4.21E-01 | HECTD4 |
| 8142663 | 2.71E-03 | 4.25E-04 | 3.631119 | -0.326611 | 3.05E-01 | NDUFA5 |
| 8021756 | 2.72E-03 | 4.26E-04 | -3.630118 | -0.329806 | -3.76E-01 | ZNF407 |
| 8174474 | 2.73E-03 | 4.30E-04 | -3.627951 | -0.336725 | -3.06E-01 | ACSL4 |
| 8051387 | 2.74E-03 | 4.31E-04 | 3.627337 | -0.338684 | 3.52E-01 | DPY30 |
| 7994280 | 2.74E-03 | 4.31E-04 | -3.627057 | -0.339576 | -3.18E-01 | IL4R |
| 8048319 | 2.77E-03 | 4.37E-04 | 3.622805 | -0.353139 | 3.59E-01 | VIL1 |
| 7999532 | 2.78E-03 | 4.38E-04 | 3.622264 | -0.354864 | 3.84E-01 | GSPT1 |
| 8166278 | 2.78E-03 | 4.40E-04 | 3.621276 | -0.358011 | 4.40E-01 | SCML1 |
| 8029907 | 2.82E-03 | 4.48E-04 | -3.616175 | -0.374258 | -3.83E-01 | C5AR1 |
| 8126296 | 2.82E-03 | 4.48E-04 | -3.615991 | -0.374844 | -3.27E-01 | TREML3P |
| 7955019 | 2.87E-03 | 4.56E-04 | -3.610774 | -0.391442 | -3.24E-01 | ARID2 |
| 7997642 | 2.89E-03 | 4.60E-04 | -3.607964 | -0.400374 | -4.53E-01 | CRISPLD2 |
| 7928551 | 2.92E-03 | 4.65E-04 | 3.604908 | -0.410081 | 4.10E-01 | RPS24 |
| 8134257 | 2.94E-03 | 4.70E-04 | 3.601844 | -0.419809 | 6.06E-01 | GNG11 |
| 7967318 | 2.98E-03 | 4.79E-04 | -3.596387 | -0.437115 | -8.08E-01 | HCAR2 |
| 8051501 | 2.99E-03 | 4.80E-04 | -3.596141 | -0.437896 | -4.66E-01 | EIF2AK2 |
| 8038885 | 3.00E-03 | 4.82E-04 | -3.594631 | -0.44268 | -6.50E-01 | SIGLEC14 |
| 8116610 | 3.07E-03 | 4.96E-04 | -3.586418 | -0.468677 | -5.26E-01 | NQO2 |
| 8047248 | 3.08E-03 | 4.98E-04 | 3.585328 | -0.472123 | 3.85E-01 | PLCL1 |
| 8056408 | 3.11E-03 | 5.06E-04 | -3.580743 | -0.486614 | -3.02E-01 | GALNT3 |
| 8155673 | 3.17E-03 | 5.17E-04 | -3.574575 | -0.506084 | -3.18E-01 | PIP5K1B |
| 8125500 | 3.18E-03 | 5.18E-04 | 3.5735 | -0.509473 | 3.30E-01 | PSMB8 |
| 8056943 | 3.18E-03 | 5.20E-04 | -3.572792 | -0.511706 | -3.47E-01 | LNPK |
| 7951178 | 3.21E-03 | 5.25E-04 | -3.570081 | -0.520252 | -4.36E-01 | TRPC6 |
| 8168589 | 3.21E-03 | 5.26E-04 | 3.569336 | -0.522601 | 3.46E-01 | ZNF711 |
| 8063386 | 3.26E-03 | 5.36E-04 | -3.563879 | -0.539783 | -3.27E-01 | CEBPB |
| 8018864 | 3.28E-03 | 5.40E-04 | -3.561888 | -0.546047 | -4.43E-01 | SOCS3 |
| 8064471 | 3.33E-03 | 5.49E-04 | -3.556577 | -0.562741 | -5.67E-01 | SIRPB1 |
| 7978833 | 3.33E-03 | 5.50E-04 | 3.556213 | -0.563885 | 3.27E-01 | RPL36AL |
| 8117422 | 3.39E-03 | 5.63E-04 | 3.549471 | -0.585049 | 3.74E-01 | HIST1H4F |
| 8051670 | 3.41E-03 | 5.67E-04 | -3.547543 | -0.591097 | -3.38E-01 | SOS1 |
| 8012605 | 3.41E-03 | 5.68E-04 | -3.546689 | -0.593774 | -3.04E-01 | GAS7 |
| 7919243 | 3.42E-03 | 5.69E-04 | 3.546084 | -0.59567 | 3.79E-01 | CD160 |
| 8052872 | 3.43E-03 | 5.71E-04 | -3.545173 | -0.598527 | -3.74E-01 | TGFA |
| 7973101 | 3.45E-03 | 5.76E-04 | 3.542668 | -0.606374 | 4.31E-01 | RNASE6 |
| 7989023 | 3.45E-03 | 5.77E-04 | -3.542375 | -0.607292 | -3.17E-01 | RAB27A |
| 8127629 | 3.50E-03 | 5.86E-04 | 3.537592 | -0.622263 | 3.08E-01 | COX7A2 |
| 7997427 | 3.57E-03 | 6.04E-04 | -3.529048 | -0.648965 | -3.13E-01 | CMIP |
| 8005953 | 3.58E-03 | 6.05E-04 | 3.528391 | -0.651017 | 3.24E-01 | SNORD4A |
| 7919095 | 3.59E-03 | 6.07E-04 | -3.527203 | -0.654726 | -3.45E-01 | NOTCH2 |
| 8105340 | 3.60E-03 | 6.10E-04 | 3.525677 | -0.659486 | 5.86E-01 | GZMA |
| 8060734 | 3.64E-03 | 6.19E-04 | -3.521749 | -0.671738 | -3.57E-01 | MIR103A2 |
| 8143367 | 3.74E-03 | 6.40E-04 | -3.51197 | -0.702187 | -3.95E-01 | SLC37A3 |
| 7929609 | 3.76E-03 | 6.43E-04 | -3.51017 | -0.707784 | -3.14E-01 | C10orf12 |
| 7903308 | 3.81E-03 | 6.56E-04 | 3.504635 | -0.724981 | 3.18E-01 | TRMT13 |
| 8065403 | 3.82E-03 | 6.58E-04 | 3.503707 | -0.727864 | 3.03E-01 | CST3 |
| 7965060 | 3.84E-03 | 6.61E-04 | 3.502408 | -0.731897 | 3.00E-01 | BBS10 |
| 8125537 | 3.85E-03 | 6.64E-04 | 3.500975 | -0.736343 | 3.54E-01 | HLA-DMA |
| 8102950 | 3.98E-03 | 6.90E-04 | 3.489351 | -0.772359 | 4.10E-01 | INPP4B |
| 8157216 | 3.99E-03 | 6.95E-04 | -3.487437 | -0.778281 | -6.57E-01 | UGCG |
| 8171708 | 4.02E-03 | 7.01E-04 | -3.484629 | -0.786963 | -3.40E-01 | CXorf23 |
| 8083447 | 4.03E-03 | 7.03E-04 | -3.484138 | -0.788481 | -3.56E-01 | P2RY1 |
| 7920766 | 4.08E-03 | 7.14E-04 | -3.479563 | -0.802612 | -3.10E-01 | ASH1L |
| 7981990 | 4.11E-03 | 7.20E-04 | 3.47682 | -0.811077 | 6.85E-01 | SNORD116-21 |
| 8029280 | 4.20E-03 | 7.38E-04 | -3.469755 | -0.832857 | -1.05 | CD177 |
| 8167971 | 4.21E-03 | 7.41E-04 | -3.46839 | -0.837062 | -4.85E-01 | MIR223 |
| 7931754 | 4.27E-03 | 7.54E-04 | -3.46308 | -0.853405 | -3.10E-01 | IDI1 |
| 7963770 | 4.30E-03 | 7.61E-04 | -3.460515 | -0.861291 | -8.10E-01 | GPR84 |
| 8138592 | 4.31E-03 | 7.65E-04 | -3.458902 | -0.866249 | -4.02E-01 | TRA2A |
| 8048283 | 4.32E-03 | 7.66E-04 | -3.458527 | -0.867399 | -4.26E-01 | SLC11A1 |
| 7923547 | 4.34E-03 | 7.72E-04 | -3.456331 | -0.874144 | -8.06E-01 | CHI3L1 |
| 8140840 | 4.35E-03 | 7.73E-04 | -3.455773 | -0.875858 | -5.54E-01 | STEAP4 |
| 8008885 | 4.39E-03 | 7.81E-04 | -3.452544 | -0.885768 | -5.58E-01 | MIR21 |
| 8039166 | 4.41E-03 | 7.87E-04 | -3.450225 | -0.892881 | -3.19E-01 | MBOAT7 |
| 8079153 | 4.51E-03 | 8.08E-04 | -3.442471 | -0.916636 | -3.50E-01 | ABHD5 |
| 7903592 | 4.51E-03 | 8.09E-04 | -3.442256 | -0.917295 | -5.59E-01 | KIAA1324 |
| 8078272 | 4.54E-03 | 8.16E-04 | 3.43954 | -0.925605 | 3.39E-01 | NR1D2 |
| 8170602 | 4.55E-03 | 8.20E-04 | 3.438226 | -0.929624 | 4.81E-01 | ZNF185 |
| 8160587 | 4.58E-03 | 8.26E-04 | 3.435945 | -0.936597 | 3.11E-01 | NDUFB6 |
| 7948221 | 4.59E-03 | 8.27E-04 | -3.435472 | -0.938044 | -4.45E-01 | PRG2 |
| 8089647 | 4.60E-03 | 8.30E-04 | -3.434453 | -0.941156 | -3.38E-01 | USF3 |
| 7928300 | 4.70E-03 | 8.52E-04 | 3.426715 | -0.964776 | 3.21E-01 | ANAPC16 |
| 7976818 | 4.83E-03 | 8.82E-04 | -3.416244 | -0.996668 | -3.36E-01 | SNORD114-6 |
| 8120501 | 4.86E-03 | 8.89E-04 | -3.41375 | -1.004252 | -3.19E-01 | COL19A1 |
| 8117458 | 4.87E-03 | 8.91E-04 | 3.413221 | -1.00586 | 3.71E-01 | BTN3A1 |
| 7900235 | 5.02E-03 | 9.27E-04 | -3.401186 | -1.042394 | -4.04E-01 | MACF1 |
| 8131705 | 5.04E-03 | 9.30E-04 | 3.40029 | -1.045109 | 3.48E-01 | RPL23P8 |
| 8058670 | 5.06E-03 | 9.35E-04 | 3.398643 | -1.050101 | 4.43E-01 | IKZF2 |
| 8117368 | 5.07E-03 | 9.37E-04 | 3.397896 | -1.052362 | 5.53E-01 | HIST1H4C |
| 7906764 | 5.07E-03 | 9.38E-04 | -3.397798 | -1.052659 | -3.39E-01 | HSPA6 |
| 7945262 | 5.10E-03 | 9.46E-04 | 3.395321 | -1.060158 | 4.80E-01 | JAM3 |
| 7931081 | 5.12E-03 | 9.51E-04 | 3.393519 | -1.065612 | 4.02E-01 | PLEKHA1 |
| 8091600 | 5.20E-03 | 9.70E-04 | -3.387707 | -1.083186 | -3.28E-01 | PLCH1 |
| 7967322 | 5.33E-03 | 9.96E-04 | -3.379469 | -1.108051 | -8.57E-01 | HCAR3 |
| 7946275 | 5.33E-03 | 9.97E-04 | 3.379384 | -1.108308 | 4.04E-01 | GVINP1 |
| 8010454 | 5.38E-03 | 1.01E-03 | -3.375781 | -1.119168 | -3.46E-01 | RNF213 |
| 8023191 | 5.38E-03 | 1.01E-03 | -3.375741 | -1.119287 | -3.81E-01 | SMAD2 |
| 8161610 | 5.41E-03 | 1.01E-03 | -3.373933 | -1.124735 | -3.54E-01 | TMEM252 |
| 8074969 | 5.48E-03 | 1.03E-03 | 3.368446 | -1.141247 | 3.14E-01 | DDT |
| 8052443 | 5.51E-03 | 1.04E-03 | -3.366897 | -1.145905 | -3.40E-01 | USP34 |
| 8093950 | 5.54E-03 | 1.05E-03 | -3.364261 | -1.153826 | -4.30E-01 | S100P |
| 8063345 | 5.61E-03 | 1.06E-03 | -3.360013 | -1.166582 | -3.20E-01 | SNORD12C |
| 8163896 | 5.61E-03 | 1.06E-03 | -3.359921 | -1.166858 | -3.99E-01 | STOM |
| 8030860 | 5.67E-03 | 1.08E-03 | -3.355242 | -1.180893 | -5.33E-01 | FPR2 |
| 8025601 | 5.70E-03 | 1.09E-03 | -3.352526 | -1.189033 | -3.72E-01 | ICAM1 |
| 7907830 | 5.76E-03 | 1.10E-03 | -3.348903 | -1.199882 | -3.27E-01 | QSOX1 |
| 8140782 | 5.77E-03 | 1.10E-03 | 3.34824 | -1.201866 | 3.78E-01 | ABCB1 |
| 8088813 | 5.83E-03 | 1.12E-03 | -3.344452 | -1.213198 | -6.44E-01 | PROK2 |
| 8166157 | 5.83E-03 | 1.12E-03 | -3.344051 | -1.214397 | -6.94E-01 | BMX |
| 7972548 | 6.04E-03 | 1.17E-03 | 3.330482 | -1.254899 | 3.28E-01 | GPR18 |
| 8113800 | 6.05E-03 | 1.17E-03 | -3.329368 | -1.258217 | -3.75E-01 | FBN2 |
| 8180404 | 6.10E-03 | 1.19E-03 | 3.326057 | -1.268076 | 3.72E-01 | RPL27A |
| 7899392 | 6.13E-03 | 1.19E-03 | 3.324494 | -1.272728 | 3.44E-01 | SCARNA1 |
| 8112176 | 6.24E-03 | 1.22E-03 | 3.317943 | -1.292204 | 4.13E-01 | RNU6ATAC |
| 8095868 | 6.24E-03 | 1.22E-03 | -3.317728 | -1.292844 | -4.82E-01 | LOC100131826 |
| 8009476 | 6.40E-03 | 1.26E-03 | -3.307724 | -1.322522 | -3.81E-01 | MAP2K6 |
| 7902227 | 6.41E-03 | 1.26E-03 | -3.307409 | -1.323454 | -3.74E-01 | GADD45A |
| 8014057 | 6.48E-03 | 1.28E-03 | -3.303092 | -1.336241 | -4.74E-01 | OMG |
| 7919815 | 6.52E-03 | 1.29E-03 | -3.300679 | -1.343379 | -3.27E-01 | CTSK |
| 8122457 | 6.57E-03 | 1.30E-03 | -3.297628 | -1.352402 | -3.14E-01 | STX11 |
| 8107474 | 6.62E-03 | 1.31E-03 | -3.294802 | -1.360752 | -3.36E-01 | DMXL1 |
| 8089701 | 6.63E-03 | 1.32E-03 | -3.29431 | -1.362204 | -3.55E-01 | ZBTB20 |
| 7940598 | 6.72E-03 | 1.34E-03 | -3.28842 | -1.379587 | -3.10E-01 | LOC399900 |
| 7961365 | 6.75E-03 | 1.35E-03 | -3.286598 | -1.384958 | -6.66E-01 | MANSC1 |
| 7936871 | 6.77E-03 | 1.35E-03 | 3.285507 | -1.388173 | 4.23E-01 | OAT |
| 8041283 | 6.77E-03 | 1.36E-03 | -3.285218 | -1.389025 | -3.43E-01 | BIRC6 |
| 8037205 | 6.84E-03 | 1.37E-03 | -3.281322 | -1.400498 | -7.25E-01 | CEACAM1 |
| 7989245 | 6.87E-03 | 1.38E-03 | -3.279695 | -1.405288 | -3.22E-01 | HSP90AB4P |
| 7940667 | 6.91E-03 | 1.39E-03 | 3.277348 | -1.412191 | 3.10E-01 | SNORA57 |
| 7985202 | 6.94E-03 | 1.40E-03 | 3.275956 | -1.416283 | 3.47E-01 | PSMA4 |
| 8057771 | 6.94E-03 | 1.40E-03 | 3.275534 | -1.417526 | 3.10E-01 | STAT4 |
| 8029076 | 7.00E-03 | 1.42E-03 | -3.272004 | -1.427897 | -3.15E-01 | CEACAM21 |
| 8001457 | 7.07E-03 | 1.43E-03 | 3.268054 | -1.43949 | 4.30E-01 | CES1 |
| 7989315 | 7.12E-03 | 1.45E-03 | 3.265237 | -1.447754 | 3.00E-01 | GTF2A2 |
| 8131067 | 7.17E-03 | 1.46E-03 | 3.262549 | -1.455633 | 3.57E-01 | GPR146 |
| 8050658 | 7.26E-03 | 1.48E-03 | -3.257736 | -1.469724 | -3.11E-01 | ATAD2B |
| 8015133 | 7.27E-03 | 1.49E-03 | -3.257037 | -1.47177 | -5.09E-01 | KRT23 |
| 8124940 | 7.37E-03 | 1.51E-03 | -3.251829 | -1.486997 | -3.73E-01 | SNORD117 |
| 7942679 | 7.45E-03 | 1.53E-03 | -3.24751 | -1.49961 | -3.17E-01 | ACER3 |
| 8029914 | 7.56E-03 | 1.56E-03 | -3.241879 | -1.516033 | -3.07E-01 | C5AR2 |
| 8108370 | 7.58E-03 | 1.56E-03 | -3.241162 | -1.518123 | -5.86E-01 | EGR1 |
| 8047174 | 7.69E-03 | 1.59E-03 | 3.235215 | -1.53544 | 3.20E-01 | SLC39A10 |
| 7955890 | 7.74E-03 | 1.61E-03 | 3.232672 | -1.542836 | 3.07E-01 | HNRNPA1 |
| 7911252 | 7.91E-03 | 1.65E-03 | -3.223682 | -1.568946 | -3.15E-01 | OR2L2 |
| 8106602 | 7.95E-03 | 1.66E-03 | -3.221907 | -1.574093 | -3.49E-01 | ZFYVE16 |
| 7922976 | 8.17E-03 | 1.72E-03 | -3.211334 | -1.60471 | -7.16E-01 | PTGS2 |
| 8083594 | 8.21E-03 | 1.73E-03 | -3.209436 | -1.610198 | -4.45E-01 | PTX3 |
| 8023401 | 8.23E-03 | 1.74E-03 | -3.208225 | -1.613698 | -3.17E-01 | CCDC68 |
| 8044849 | 8.30E-03 | 1.75E-03 | 3.205215 | -1.622392 | 3.16E-01 | PTPN4 |
| 8144917 | 8.32E-03 | 1.76E-03 | -3.204171 | -1.625405 | -3.00E-01 | LPL |
| 8141843 | 8.32E-03 | 1.76E-03 | 3.204066 | -1.625707 | 3.10E-01 | LOC102724229 |
| 7981192 | 8.37E-03 | 1.77E-03 | -3.201618 | -1.632772 | -3.38E-01 | ATG2B |
| 8127158 | 8.42E-03 | 1.79E-03 | 3.19925 | -1.6396 | 3.44E-01 | GCLC |
| 8124088 | 8.42E-03 | 1.79E-03 | -3.199228 | -1.639662 | -3.21E-01 | KIF13A |
| 8168531 | 8.53E-03 | 1.82E-03 | 3.193792 | -1.655324 | 4.27E-01 | GPR174 |
| 8160011 | 8.62E-03 | 1.84E-03 | -3.19029 | -1.6654 | -3.16E-01 | KIAA2026 |
| 8031238 | 8.85E-03 | 1.90E-03 | 3.180702 | -1.692941 | 3.34E-01 | LILRB4 |
| 7917728 | 8.88E-03 | 1.90E-03 | 3.179368 | -1.696766 | 3.29E-01 | FAM69A |
| 8118111 | 8.94E-03 | 1.92E-03 | 3.176598 | -1.704709 | 3.35E-01 | HCP5 |
| 8143471 | 8.95E-03 | 1.92E-03 | -3.176258 | -1.705684 | -5.70E-01 | CLEC5A |
| 8177261 | 9.08E-03 | 1.96E-03 | -3.17071 | -1.721568 | -3.18E-01 | TTTY10 |
| 8082100 | 9.32E-03 | 2.02E-03 | -3.160333 | -1.751221 | -4.05E-01 | PARP14 |
| 8042356 | 9.41E-03 | 2.04E-03 | -3.156727 | -1.761506 | -4.88E-01 | MEIS1 |
| 7973067 | 9.57E-03 | 2.09E-03 | 3.149837 | -1.781131 | 3.11E-01 | PNP |
| 8177628 | 9.70E-03 | 2.12E-03 | -3.14466 | -1.795852 | -4.38E-01 | CCDC125 |
| 8027862 | 9.98E-03 | 2.20E-03 | -3.133983 | -1.82615 | -7.49E-01 | FFAR2 |
| 8084742 | 9.98E-03 | 2.20E-03 | -3.133747 | -1.826819 | -3.33E-01 | LPP |
| 8130553 | 1.01E-02 | 2.23E-03 | -3.12965 | -1.838422 | -3.11E-01 | LOC401281 |
| 8044574 | 1.01E-02 | 2.23E-03 | -3.12942 | -1.839072 | -3.71E-01 | IL1RN |
| 8089875 | 1.01E-02 | 2.24E-03 | -3.127383 | -1.844836 | -3.06E-01 | POLQ |
| 8072170 | 1.02E-02 | 2.25E-03 | -3.126701 | -1.846765 | -4.08E-01 | KREMEN1 |
| 8108478 | 1.05E-02 | 2.34E-03 | -3.113895 | -1.88292 | -5.25E-01 | CYSTM1 |
| 7944223 | 1.05E-02 | 2.35E-03 | -3.112713 | -1.886252 | -3.74E-01 | KMT2A |
| 7911241 | 1.05E-02 | 2.35E-03 | -3.112711 | -1.886257 | -3.83E-01 | OR2L8 |
| 8033257 | 1.05E-02 | 2.35E-03 | -3.1125 | -1.886851 | -4.26E-01 | C3 |
| 8126878 | 1.07E-02 | 2.41E-03 | -3.104431 | -1.909559 | -5.49E-01 | RHAG |
| 7919160 | 1.07E-02 | 2.41E-03 | -3.104314 | -1.90989 | -3.94E-01 | RNVU1-4 |
| 8025285 | 1.08E-02 | 2.43E-03 | -3.10094 | -1.919369 | -4.93E-01 | MCEMP1 |
| 8163908 | 1.13E-02 | 2.57E-03 | 3.083834 | -1.967303 | 4.13E-01 | GGTA1P |
| 8106660 | 1.13E-02 | 2.57E-03 | 3.082813 | -1.970156 | 3.27E-01 | RASGRF2 |
| 8154725 | 1.14E-02 | 2.62E-03 | -3.077217 | -1.985783 | -3.04E-01 | KRT18 |
| 7897890 | 1.15E-02 | 2.65E-03 | -3.073538 | -1.996044 | -3.08E-01 | VPS13D |
| 8145636 | 1.18E-02 | 2.71E-03 | -3.065883 | -2.017362 | -3.08E-01 | HMBOX1 |
| 7902861 | 1.19E-02 | 2.76E-03 | -3.060524 | -2.032259 | -3.37E-01 | LRRC8B |
| 8091778 | 1.23E-02 | 2.87E-03 | 3.047118 | -2.069429 | 3.48E-01 | SCARNA7 |
| 7963760 | 1.24E-02 | 2.91E-03 | -3.043531 | -2.079353 | -3.33E-01 | NFE2 |
| 7971950 | 1.25E-02 | 2.94E-03 | -3.039676 | -2.090003 | -3.23E-01 | DACH1 |
| 7915612 | 1.26E-02 | 2.96E-03 | -3.037837 | -2.09508 | -4.91E-01 | PTCH2 |
| 7909441 | 1.26E-02 | 2.96E-03 | -3.037223 | -2.096777 | -5.60E-01 | G0S2 |
| 8127989 | 1.27E-02 | 2.99E-03 | 3.034672 | -2.103815 | 3.52E-01 | SNORD50B |
| 7961279 | 1.27E-02 | 3.00E-03 | -3.033012 | -2.108392 | -4.82E-01 | TAS2R14 |
| 8039196 | 1.29E-02 | 3.04E-03 | -3.029203 | -2.118887 | -3.33E-01 | LILRB3 |
| 7989094 | 1.29E-02 | 3.04E-03 | -3.028631 | -2.120462 | -3.63E-01 | NEDD4 |
| 8021301 | 1.29E-02 | 3.05E-03 | -3.027823 | -2.122686 | -5.00E-01 | RAB27B |
| 7970513 | 1.34E-02 | 3.20E-03 | 3.012111 | -2.165839 | 3.05E-01 | SKA3 |
| 8132743 | 1.35E-02 | 3.22E-03 | -3.009916 | -2.171854 | -7.76E-01 | ABCA13 |
| 7978123 | 1.38E-02 | 3.31E-03 | 3.001176 | -2.195763 | 3.42E-01 | PSME2 |
| 8166059 | 1.38E-02 | 3.32E-03 | 2.999719 | -2.199742 | 3.69E-01 | TLR7 |
| 8048432 | 1.38E-02 | 3.33E-03 | -2.999153 | -2.201289 | -3.70E-01 | CYP27A1 |
| 8170119 | 1.41E-02 | 3.42E-03 | 2.98971 | -2.227038 | 3.93E-01 | FHL1 |
| 8180373 | 1.42E-02 | 3.44E-03 | 2.987955 | -2.231817 | 3.48E-01 | SUMO1 |
| 7961059 | 1.44E-02 | 3.51E-03 | 2.981183 | -2.250232 | 6.11E-01 | KLRB1 |
| 7908841 | 1.45E-02 | 3.55E-03 | -2.978267 | -2.258149 | -3.05E-01 | PPP1R12B |
| 8122464 | 1.45E-02 | 3.55E-03 | -2.977896 | -2.259157 | -3.60E-01 | UTRN |
| 7981976 | 1.46E-02 | 3.57E-03 | 2.976267 | -2.263577 | 5.19E-01 | SNORD116-14 |
| 7922406 | 1.48E-02 | 3.62E-03 | 2.971032 | -2.277769 | 3.02E-01 | SNORD79 |
| 7897801 | 1.50E-02 | 3.69E-03 | -2.965317 | -2.293236 | -4.38E-01 | RNU5E-1 |
| 8116983 | 1.50E-02 | 3.69E-03 | -2.964647 | -2.295046 | -3.31E-01 | CD83 |
| 8061416 | 1.52E-02 | 3.76E-03 | -2.959057 | -2.310149 | -4.59E-01 | CST7 |
| 7908459 | 1.52E-02 | 3.76E-03 | -2.959 | -2.310302 | -3.00E-01 | CFH |
| 8164008 | 1.54E-02 | 3.82E-03 | -2.953388 | -2.325439 | -3.03E-01 | MIR600HG |
| 8039226 | 1.54E-02 | 3.83E-03 | -2.953094 | -2.326233 | -3.78E-01 | LILRA3 |
| 7933821 | 1.55E-02 | 3.85E-03 | 2.951169 | -2.331419 | 3.11E-01 | RHOBTB1 |
| 8097903 | 1.55E-02 | 3.86E-03 | -2.949974 | -2.334635 | -3.01E-01 | TLR2 |
| 7972003 | 1.57E-02 | 3.91E-03 | 2.945791 | -2.345892 | 3.75E-01 | KLF12 |
| 8097335 | 1.59E-02 | 3.98E-03 | -2.93988 | -2.361773 | -3.05E-01 | HSPA4L |
| 8054722 | 1.59E-02 | 4.00E-03 | -2.938177 | -2.366344 | -5.08E-01 | IL1B |
| 7937942 | 1.60E-02 | 4.01E-03 | -2.93717 | -2.369044 | -4.37E-01 | OR52K1 |
| 8157446 | 1.60E-02 | 4.01E-03 | -2.937144 | -2.369115 | -6.08E-01 | ORM1 |
| 7924499 | 1.60E-02 | 4.03E-03 | -2.93584 | -2.372613 | -3.56E-01 | TLR5 |
| 8038809 | 1.62E-02 | 4.08E-03 | -2.931463 | -2.38434 | -4.15E-01 | NKG7 |
| 8115327 | 1.64E-02 | 4.14E-03 | 2.926477 | -2.397684 | 5.19E-01 | SPARC |
| 8072744 | 1.66E-02 | 4.23E-03 | -2.919655 | -2.415908 | -3.51E-01 | NCF4 |
| 7908388 | 1.67E-02 | 4.26E-03 | 2.917235 | -2.422365 | 5.29E-01 | RGS1 |
| 8162744 | 1.68E-02 | 4.27E-03 | -2.916477 | -2.424386 | -3.28E-01 | CORO2A |
| 8103722 | 1.68E-02 | 4.27E-03 | 2.916431 | -2.424506 | 3.49E-01 | HSP90AA6P |
| 8030366 | 1.68E-02 | 4.29E-03 | 2.914651 | -2.429253 | 3.48E-01 | SNORD35A |
| 7953878 | 1.71E-02 | 4.38E-03 | 2.907742 | -2.447644 | 3.43E-01 | CLEC2D |
| 8100210 | 1.72E-02 | 4.43E-03 | 2.90414 | -2.457218 | 3.70E-01 | TXK |
| 7969096 | 1.75E-02 | 4.52E-03 | -2.897458 | -2.474953 | -3.05E-01 | CDADC1 |
| 8170364 | 1.76E-02 | 4.54E-03 | -2.895398 | -2.480412 | -3.14E-01 | AFF2 |
| 8008723 | 1.82E-02 | 4.73E-03 | -2.882041 | -2.515735 | -4.11E-01 | EPX |
| 7929026 | 1.85E-02 | 4.83E-03 | -2.874857 | -2.534672 | -3.22E-01 | ACTA2-AS1 |
| 8171013 | 1.87E-02 | 4.91E-03 | 2.869236 | -2.549464 | 3.10E-01 | VBP1 |
| 7981988 | 1.87E-02 | 4.91E-03 | 2.869185 | -2.549599 | 4.62E-01 | SNORD116-20 |
| 7932598 | 1.88E-02 | 4.95E-03 | 2.866566 | -2.55648 | 4.43E-01 | ENKUR |
| 8118594 | 1.94E-02 | 5.16E-03 | 2.852384 | -2.593657 | 4.18E-01 | HLA-DPB1 |
| 8171313 | 2.05E-02 | 5.52E-03 | -2.828922 | -2.654809 | -3.02E-01 | ARHGAP6 |
| 7916984 | 2.11E-02 | 5.76E-03 | 2.814818 | -2.69136 | 3.02E-01 | MIR186 |
| 7906386 | 2.12E-02 | 5.79E-03 | 2.81294 | -2.696216 | 3.67E-01 | PYHIN1 |
| 8062927 | 2.15E-02 | 5.86E-03 | -2.808536 | -2.70759 | -3.62E-01 | PI3 |
| 8018038 | 2.15E-02 | 5.88E-03 | -2.807757 | -2.709601 | -3.18E-01 | ABCA5 |
| 8100378 | 2.17E-02 | 5.97E-03 | -2.802479 | -2.723207 | -3.12E-01 | RPL21P44 |
| 8129637 | 2.19E-02 | 6.03E-03 | -2.798576 | -2.733257 | -4.08E-01 | VNN2 |
| 7981978 | 2.20E-02 | 6.06E-03 | 2.797307 | -2.736521 | 5.08E-01 | SNORD116-15 |
| 8177222 | 2.20E-02 | 6.06E-03 | -2.797265 | -2.736629 | -5.44E-01 | CD24 |
| 8107909 | 2.20E-02 | 6.06E-03 | -2.79704 | -2.737207 | -3.58E-01 | SLC22A4 |
| 7915592 | 2.21E-02 | 6.08E-03 | -2.795778 | -2.740452 | -8.18E-01 | RNU5D-1 |
| 8079079 | 2.26E-02 | 6.28E-03 | -2.784457 | -2.769506 | -3.07E-01 | NKTR |
| 8030782 | 2.30E-02 | 6.41E-03 | -2.777615 | -2.787015 | -3.28E-01 | SIGLEC9 |
| 8135069 | 2.32E-02 | 6.48E-03 | -2.773795 | -2.796772 | -3.35E-01 | SERPINE1 |
| 8175288 | 2.36E-02 | 6.63E-03 | 2.765818 | -2.817115 | 3.57E-01 | MOSPD1 |
| 7916609 | 2.36E-02 | 6.64E-03 | -2.765283 | -2.818477 | -4.04E-01 | JUN |
| 8147019 | 2.37E-02 | 6.65E-03 | 2.764591 | -2.820239 | 3.15E-01 | ZC2HC1A |
| 8038899 | 2.40E-02 | 6.77E-03 | -2.758518 | -2.835685 | -3.35E-01 | FPR1 |
| 8051396 | 2.41E-02 | 6.78E-03 | -2.757858 | -2.837362 | -4.22E-01 | NLRC4 |
| 8166065 | 2.44E-02 | 6.89E-03 | -2.752199 | -2.851726 | -3.03E-01 | TLR8 |
| 8138202 | 2.50E-02 | 7.12E-03 | -2.740926 | -2.880262 | -3.01E-01 | ICA1 |
| 8122684 | 2.50E-02 | 7.13E-03 | -2.740647 | -2.880967 | -3.86E-01 | SUMO4 |
| 7903777 | 2.57E-02 | 7.36E-03 | 2.729088 | -2.910117 | 3.49E-01 | GSTM5 |
| 8099826 | 2.60E-02 | 7.47E-03 | -2.723813 | -2.923384 | -3.31E-01 | TLR10 |
| 8147244 | 2.60E-02 | 7.48E-03 | -2.723553 | -2.924038 | -6.14E-01 | NECAB1 |
| 8099850 | 2.61E-02 | 7.51E-03 | 2.722045 | -2.927827 | 3.01E-01 | TMEM156 |
| 7961275 | 2.66E-02 | 7.70E-03 | -2.713455 | -2.949372 | -3.98E-01 | TAS2R13 |
| 8171545 | 2.68E-02 | 7.75E-03 | 2.710944 | -2.955658 | 4.03E-01 | BEND2 |
| 8010915 | 2.68E-02 | 7.76E-03 | -2.710483 | -2.956813 | -3.03E-01 | FAM101B |
| 7961281 | 2.72E-02 | 7.91E-03 | -2.703776 | -2.973577 | -4.44E-01 | TAS2R50 |
| 7902158 | 2.75E-02 | 8.03E-03 | -2.698638 | -2.986396 | -3.79E-01 | TCTEX1D1 |
| 8104930 | 2.76E-02 | 8.06E-03 | -2.697251 | -2.989852 | -3.74E-01 | SLC1A3 |
| 8069668 | 2.85E-02 | 8.41E-03 | -2.682182 | -3.027306 | -3.42E-01 | CYYR1 |
| 8074399 | 2.86E-02 | 8.46E-03 | -2.679821 | -3.033158 | -3.51E-01 | CLTCL1 |
| 8055969 | 2.96E-02 | 8.84E-03 | -2.664397 | -3.071272 | -3.30E-01 | ERMN |
| 8161211 | 3.01E-02 | 9.04E-03 | -2.656186 | -3.091485 | -3.01E-01 | PAX5 |
| 8152280 | 3.03E-02 | 9.09E-03 | -2.654345 | -3.09601 | -3.93E-01 | LRP12 |
| 8130578 | 3.06E-02 | 9.20E-03 | 2.649939 | -3.106825 | 3.24E-01 | SNORA20 |
| 7969794 | 3.10E-02 | 9.35E-03 | -2.644254 | -3.120758 | -4.51E-01 | LOC100132099 |
| 8009502 | 3.14E-02 | 9.51E-03 | -2.638009 | -3.136034 | -4.47E-01 | KCNJ2 |
| 7898894 | 3.17E-02 | 9.62E-03 | 2.633829 | -3.14624 | 3.03E-01 | PITHD1 |
| 8084732 | 3.17E-02 | 9.63E-03 | 2.633588 | -3.146828 | 3.11E-01 | RTP4 |
| 7922400 | 3.24E-02 | 9.88E-03 | 2.624348 | -3.169338 | 3.05E-01 | SNORD81 |
| 7977732 | 3.28E-02 | 1.00E-02 | 2.618693 | -3.18308 | 4.50E-01 | SNORD8 |
| 7970737 | 3.29E-02 | 1.01E-02 | -2.617681 | -3.185535 | -3.49E-01 | FLT3 |
| 8091530 | 3.32E-02 | 1.02E-02 | 2.613154 | -3.196513 | 4.07E-01 | P2RY12 |
| 8055952 | 3.42E-02 | 1.06E-02 | -2.59973 | -3.228967 | -3.53E-01 | NR4A2 |
| 8026456 | 3.45E-02 | 1.07E-02 | -2.595595 | -3.238933 | -4.88E-01 | CYP4F3 |
| 8083272 | 3.45E-02 | 1.07E-02 | -2.594697 | -3.241096 | -4.06E-01 | GYG1 |
| 8083839 | 3.46E-02 | 1.07E-02 | -2.594067 | -3.242613 | -3.36E-01 | GPR160 |
| 7944623 | 3.47E-02 | 1.08E-02 | 2.592615 | -3.246107 | 3.01E-01 | TBCEL |
| 7917037 | 3.55E-02 | 1.11E-02 | 2.581772 | -3.27215 | 3.67E-01 | CRYZ |
| 7980537 | 3.57E-02 | 1.12E-02 | -2.579425 | -3.277775 | -3.47E-01 | STON2 |
| 7954631 | 3.62E-02 | 1.14E-02 | -2.572571 | -3.294175 | -3.42E-01 | FAR2 |
| 8114010 | 3.67E-02 | 1.16E-02 | -2.566986 | -3.307507 | -3.04E-01 | IRF1 |
| 8177137 | 3.70E-02 | 1.17E-02 | -2.562897 | -3.317255 | -1.07 | UTY |
| 8095986 | 3.72E-02 | 1.18E-02 | -2.56028 | -3.323483 | -6.02E-01 | ANXA3 |
| 8075956 | 3.81E-02 | 1.21E-02 | 2.549255 | -3.34967 | 5.97E-01 | LGALS2 |
| 7953835 | 3.94E-02 | 1.27E-02 | 2.532782 | -3.388606 | 3.35E-01 | KLRG1 |
| 8098439 | 4.03E-02 | 1.30E-02 | -2.522305 | -3.413254 | -3.25E-01 | EPCAM |
| 7928999 | 4.10E-02 | 1.33E-02 | -2.514502 | -3.431553 | -4.28E-01 | LIPN |
| 7981996 | 4.14E-02 | 1.35E-02 | 2.510652 | -3.440561 | 5.14E-01 | SNORD116-24 |
| 7907160 | 4.15E-02 | 1.35E-02 | -2.508413 | -3.445796 | -3.04E-01 | ATP1B1 |
| 7961293 | 4.17E-02 | 1.36E-02 | -2.506473 | -3.450326 | -4.20E-01 | TAS2R46 |
| 8082086 | 4.22E-02 | 1.38E-02 | -2.501309 | -3.462374 | -3.86E-01 | PARP15 |
| 7943240 | 4.27E-02 | 1.40E-02 | -2.495138 | -3.476741 | -3.30E-01 | PIWIL4 |
| 8132318 | 4.31E-02 | 1.42E-02 | -2.49131 | -3.485639 | -3.80E-01 | ANLN |
| 7982072 | 4.40E-02 | 1.46E-02 | 2.481347 | -3.508734 | 3.22E-01 | SNORD115-33 |
| 8096733 | 4.42E-02 | 1.47E-02 | 2.478642 | -3.514992 | 3.08E-01 | SGMS2 |
| 8037742 | 4.44E-02 | 1.47E-02 | -2.476823 | -3.519196 | -4.53E-01 | PGLYRP1 |
| 7897522 | 4.53E-02 | 1.51E-02 | 2.466427 | -3.543169 | 3.21E-01 | RBP7 |
| 7961287 | 4.61E-02 | 1.54E-02 | -2.459132 | -3.559938 | -4.22E-01 | TAS2R19 |
| 8161755 | 4.61E-02 | 1.55E-02 | 2.458627 | -3.561097 | 3.69E-01 | ALDH1A1 |
| 8016832 | 4.62E-02 | 1.55E-02 | 2.457589 | -3.563477 | 3.28E-01 | MMD |
| 8122058 | 4.65E-02 | 1.56E-02 | -2.455192 | -3.568976 | -6.03E-01 | ARG1 |
| 7898448 | 4.69E-02 | 1.58E-02 | -2.449901 | -3.581092 | -3.53E-01 | PADI4 |
| 8016932 | 4.78E-02 | 1.62E-02 | -2.440747 | -3.601999 | -6.06E-01 | MPO |
| 8176578 | 4.78E-02 | 1.62E-02 | -2.440353 | -3.602899 | -7.34E-01 | USP9Y |
| 7934898 | 4.79E-02 | 1.63E-02 | -2.439235 | -3.605446 | -6.36E-01 | ANKRD22 |
| 8156228 | 4.83E-02 | 1.64E-02 | 2.435697 | -3.613504 | 3.11E-01 | CTSL |
| 8180346 | 4.88E-02 | 1.66E-02 | 2.431663 | -3.622678 | 3.43E-01 | GPX1 |

Table S3 Enrichment analysis results of blue module.

| Ontology | ID | Description | GeneRatio | BgRatio | pvalue | p.adjust |
| --- | --- | --- | --- | --- | --- | --- |
| BP | GO:0002181 | cytoplasmic translation | 31/172 | 146/18800 | 7.69e-34 | 2.06e-30 |
| BP | GO:0042254 | ribosome biogenesis | 24/172 | 304/18800 | 6.47e-16 | 8.65e-13 |
| BP | GO:0022613 | ribonucleoprotein complex biogenesis | 26/172 | 448/18800 | 5.7e-14 | 5.08e-11 |
| BP | GO:0006364 | rRNA processing | 19/172 | 226/18800 | 2.67e-13 | 1.78e-10 |
| BP | GO:0016072 | rRNA metabolic process | 20/172 | 264/18800 | 4.32e-13 | 2.31e-10 |
| CC | GO:0022626 | cytosolic ribosome | 28/176 | 102/19594 | 2.89e-34 | 9.83e-32 |
| CC | GO:0044391 | ribosomal subunit | 30/176 | 178/19594 | 9.3e-30 | 1.58e-27 |
| CC | GO:0005840 | ribosome | 31/176 | 229/19594 | 1.09e-27 | 1.24e-25 |
| CC | GO:0022627 | cytosolic small ribosomal subunit | 14/176 | 43/19594 | 8.23e-19 | 7e-17 |
| CC | GO:0022625 | cytosolic large ribosomal subunit | 14/176 | 58/19594 | 9.48e-17 | 6.45e-15 |
| MF | GO:0003735 | structural constituent of ribosome | 29/169 | 181/18410 | 6.78e-28 | 2.81e-25 |
| MF | GO:0019843 | rRNA binding | 8/169 | 66/18410 | 1.56e-07 | 3.24e-05 |
| MF | GO:0030695 | GTPase regulator activity | 16/169 | 488/18410 | 1.14e-05 | 0.0010 |
| MF | GO:0060589 | nucleoside-triphosphatase regulator activity | 16/169 | 488/18410 | 1.14e-05 | 0.0010 |
| MF | GO:0008135 | translation factor activity, RNA binding | 7/169 | 84/18410 | 1.21e-05 | 0.0010 |
| KEGG | hsa03010 | Ribosome | 29/104 | 158/8164 | 2.06e-26 | 4.16e-24 |
| KEGG | hsa05171 | Coronavirus disease - COVID-19 | 28/104 | 232/8164 | 2.66e-20 | 2.69e-18 |
| KEGG | hsa05215 | Prostate cancer | 7/104 | 97/8164 | 0.0002 | 0.0150 |
| KEGG | hsa01521 | EGFR tyrosine kinase inhibitor resistance | 6/104 | 79/8164 | 0.0005 | 0.0245 |
| KEGG | hsa04935 | Growth hormone synthesis, secretion and action | 7/104 | 120/8164 | 0.0008 | 0.0329 |

Table S4 Enrichment analysis results of brown module.

| Ontology | ID | Description | GeneRatio | BgRatio | pvalue | p.adjust |
| --- | --- | --- | --- | --- | --- | --- |
| BP | GO:0002181 | cytoplasmic translation | 5/37 | 146/18800 | 9.41e-06 | 0.0057 |
| BP | GO:0006119 | oxidative phosphorylation | 4/37 | 139/18800 | 0.0002 | 0.0472 |
| BP | GO:0018202 | peptidyl-histidine modification | 2/37 | 13/18800 | 0.0003 | 0.0584 |
| BP | GO:0009060 | aerobic respiration | 4/37 | 187/18800 | 0.0005 | 0.0731 |
| BP | GO:0042773 | ATP synthesis coupled electron transport | 3/37 | 92/18800 | 0.0008 | 0.0786 |
| CC | GO:0098798 | mitochondrial protein-containing complex | 5/40 | 281/19594 | 0.0003 | 0.0077 |
| CC | GO:0034709 | methylosome | 2/40 | 12/19594 | 0.0003 | 0.0077 |
| CC | GO:0098800 | inner mitochondrial membrane protein complex | 4/40 | 155/19594 | 0.0003 | 0.0077 |
| CC | GO:0005852 | eukaryotic translation initiation factor 3 complex | 2/40 | 15/19594 | 0.0004 | 0.0077 |
| CC | GO:0033290 | eukaryotic 48S preinitiation complex | 2/40 | 15/19594 | 0.0004 | 0.0077 |
| MF | GO:0051087 | chaperone binding | 3/38 | 106/18410 | 0.0014 | 0.0730 |
| MF | GO:0008137 | NADH dehydrogenase (ubiquinone) activity | 2/38 | 42/18410 | 0.0034 | 0.0730 |
| MF | GO:0050136 | NADH dehydrogenase (quinone) activity | 2/38 | 43/18410 | 0.0036 | 0.0730 |
| MF | GO:0003954 | NADH dehydrogenase activity | 2/38 | 45/18410 | 0.0039 | 0.0730 |
| MF | GO:0003955 | NAD(P)H dehydrogenase (quinone) activity | 2/38 | 45/18410 | 0.0039 | 0.0730 |
| KEGG | hsa00190 | Oxidative phosphorylation | 3/17 | 134/8164 | 0.0025 | 0.0696 |
| KEGG | hsa05014 | Amyotrophic lateral sclerosis | 4/17 | 364/8164 | 0.0058 | 0.0803 |
| KEGG | hsa05208 | Chemical carcinogenesis - reactive oxygen species | 3/17 | 223/8164 | 0.0103 | 0.0803 |
| KEGG | hsa04714 | Thermogenesis | 3/17 | 232/8164 | 0.0115 | 0.0803 |
| KEGG | hsa05012 | Parkinson disease | 3/17 | 266/8164 | 0.0166 | 0.0829 |

Table S5 Enrichment analysis results of turquoise module.

| Ontology | ID | Description | GeneRatio | BgRatio | pvalue | p.adjust |
| --- | --- | --- | --- | --- | --- | --- |
| BP | GO:0030217 | T cell differentiation | 26/213 | 263/18800 | 3.08e-17 | 8.97e-14 |
| BP | GO:0030098 | lymphocyte differentiation | 28/213 | 382/18800 | 4.11e-15 | 4.9e-12 |
| BP | GO:0050852 | T cell receptor signaling pathway | 18/213 | 127/18800 | 5.05e-15 | 4.9e-12 |
| BP | GO:0002429 | immune response-activating cell surface receptor signaling pathway | 24/213 | 300/18800 | 6.33e-14 | 3.69e-11 |
| BP | GO:0002757 | immune response-activating signal transduction | 24/213 | 300/18800 | 6.33e-14 | 3.69e-11 |
| CC | GO:0042581 | specific granule | 17/220 | 160/19594 | 3.22e-12 | 1.09e-09 |
| CC | GO:0030667 | secretory granule membrane | 22/220 | 312/19594 | 7.97e-12 | 1.35e-09 |
| CC | GO:0070821 | tertiary granule membrane | 12/220 | 73/19594 | 2.99e-11 | 3.37e-09 |
| CC | GO:0035579 | specific granule membrane | 12/220 | 91/19594 | 4.3e-10 | 3.59e-08 |
| CC | GO:0070820 | tertiary granule | 15/220 | 164/19594 | 5.32e-10 | 3.59e-08 |
| MF | GO:0019203 | carbohydrate phosphatase activity | 3/217 | 10/18410 | 0.0002 | 0.0285 |
| MF | GO:0042608 | T cell receptor binding | 3/217 | 10/18410 | 0.0002 | 0.0285 |
| MF | GO:0050308 | sugar-phosphatase activity | 3/217 | 10/18410 | 0.0002 | 0.0285 |
| MF | GO:0030159 | signaling receptor complex adaptor activity | 5/217 | 50/18410 | 0.0003 | 0.0351 |
| MF | GO:0140375 | immune receptor activity | 8/217 | 148/18410 | 0.0004 | 0.0353 |
| KEGG | hsa04660 | T cell receptor signaling pathway | 13/108 | 104/8164 | 8.2e-10 | 1.88e-07 |
| KEGG | hsa05235 | PD-L1 expression and PD-1 checkpoint pathway in cancer | 10/108 | 89/8164 | 2.29e-07 | 2.62e-05 |
| KEGG | hsa05340 | Primary immunodeficiency | 7/108 | 38/8164 | 5.25e-07 | 3.6e-05 |
| KEGG | hsa04640 | Hematopoietic cell lineage | 10/108 | 99/8164 | 6.29e-07 | 3.6e-05 |
| KEGG | hsa04659 | Th17 cell differentiation | 10/108 | 108/8164 | 1.42e-06 | 6.49e-05 |
